# Supplementary material for: Palladium-catalyzed dearomative cyclocarbonylation of allyl alcohol for the synthesis of quinolizinones
Source: Royal Society of Chemistry journal article supplement (doi:10.1039/d0ob02529a), 2021-01-01

Supporting Information for:

## **Palladium-Catalyzed Dearomative Cyclocarbonylation of Allyl Alcohol for the Synthesis of Quinolizinones**

Pengcheng Xu,<sup>a,c</sup> Bo Qian,<sup>\*a</sup> Zaojuan Qi,<sup>a</sup> Bao Gao,<sup>b</sup> Bin Hu,<sup>\*a</sup> and Hanmin Huang<sup>\*a,b</sup>

<sup>a</sup> State Key Laboratory for Oxo Synthesis and Selective Oxidation, Lanzhou Institute of Chemical Physics, Chinese Academy of Sciences, Lanzhou 730000, P. R. China.

<sup>b</sup> Hefei National Laboratory for Physical Sciences at the Microscale and Department of Chemistry, Center for Excellence in Molecular Synthesis, University of Science and Technology of China, Chinese Academy of Sciences, Hefei 230026, P. R. China.

<sup>c</sup> University of Chinese Academy of Sciences, Beijing 100049, P. R. China.

### **Contents**

|          |                                                                       |            |
|----------|-----------------------------------------------------------------------|------------|
| <b>1</b> | <b>General experimental details and materials.....</b>                | <b>S2</b>  |
| <b>2</b> | <b>Preparation of starting materials.....</b>                         | <b>S3</b>  |
| <b>3</b> | <b>Experimental characterization data for starting materials.....</b> | <b>S7</b>  |
| <b>4</b> | <b>General procedure for the synthesis of product.....</b>            | <b>S14</b> |
| <b>5</b> | <b>Optimization of the reaction conditions.....</b>                   | <b>S15</b> |
| <b>6</b> | <b>Experimental characterization data for products.....</b>           | <b>S18</b> |
| <b>7</b> | <b>Copies of NMR of starting materials and products.....</b>          | <b>S24</b> |

## 1. General experiment details and materials

All non-aqueous reactions and manipulations were used by standard Schlenk techniques. All solvents before used were dried by standard methods and stored under argon atmosphere. All reactions were monitored by TLC with silica gel-coated plates. NMR spectra were recorded on BRUKER Avance III (400 MHz) spectrometers. Chemical shifts were reported in parts per million (ppm) down field from tetramethylsilane (TMS) with the solvent resonance as the internal standard. Coupling constants (J) were reported in Hz and referred to apparent peak multiplications. High resolution mass spectra (HRMS) were recorded on Bruker MicroTOF-QII mass instrument (ESI). GC-MS analysis were performed with Agilent 7890B/5975B GC-MS system. All chemicals were purchased from commercial sources.

## 2. Preparation of starting materials

### 2.1. Method A:

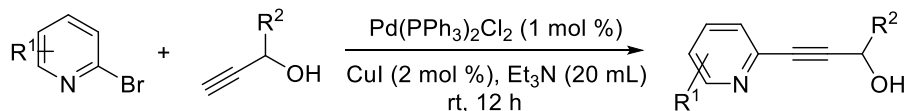

2-Bromopyridine (10 mmol, 1 equiv), prop-2-yn-1-ol (12 mmol, 1.2 equiv), Pd(PPh)<sub>2</sub>Cl<sub>2</sub> (0.1 mmol, 1 mol %), CuI (0.2 mmol, 2 mol %), and Et<sub>3</sub>N (50 mmol) were added to a 100 mL Schlenk flask under nitrogen atmosphere. The reaction mixture was stirred at room temperature for 12 hours and monitored by TLC. Then the reaction mixture was concentrated under reduced pressure. The crude product was purified by flash chromatography employing mixtures of petroleum ether/ EtOAc as eluents.

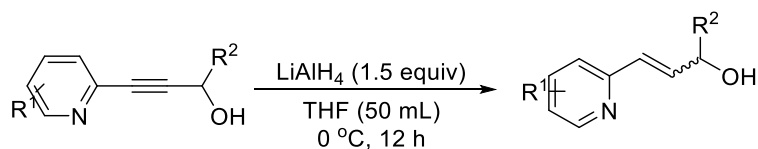

The above residue and anhydrous THF (50 mL) were added to 100 mL flask under nitrogen atmosphere. Then LiAlH<sub>4</sub> was carefully added in a few portions at 0 °C. The reaction mixture was gradually warmed to room temperature and stirred overnight. The reaction mixture was then cooled to 0 °C and quenched with EtOAc, followed by water. The solid aluminum salts was filtered, then the organic layer was separated and the aqueous layer was extracted with EtOAc (20 mL×3). The combined organic layer was dried over Na<sub>2</sub>SO<sub>4</sub>, filtered, and concentrated under reduced pressure. The crude residue was purified by flash column chromatography on silica gel and eluted with EtOAc/petroleum ether (1/3~1/1) afford the corresponding allylic alcohols **1a** (0.86 g, 67% yield).

## 2.2. Method B:

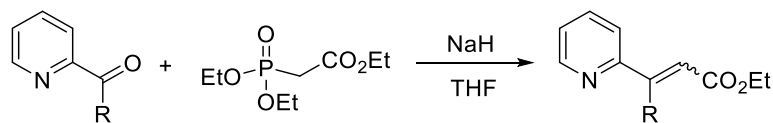

To a 100 mL round bottom flask containing NaH (20 mmol, 60% mineraldispersion) and anhydrous THF (40 mL) at 0 °C, triethyl phosphonoacetate (21.5 mmol) was dropwise added. The reaction mixture was naturally warmed to room temperature, followed by a dropwise addition of a 2-acetylpyridine solution (13 mmol, in 20 mL anhydrous THF). The reaction mixture was stirred for 12 hours, and then poured into a separating funnel containing water. The organic layer was collected, and the aqueous layer was extracted with diethyl ether (3×50 mL). The combined organic layer was dried over Na<sub>2</sub>SO<sub>4</sub>, filtered, and concentrated under reduced pressure. The crude residue was subjected to flash chromatography (EtOAc/petroleum ether = 1/80~1/20) to afford the corresponding  $\alpha,\beta$ -unsaturated ester (1.74 g, 70% yield)

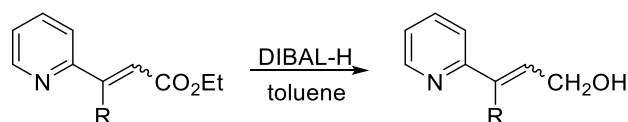

To a flame-dried 100 mL flask containing the unsaturated ester (20 mmol) obtained above and anhydrous toluene (30 mL), DIBAL-H (40 mmol) was carefully dropwise added at -78 °C. The reaction mixture was gradually warmed to room temperature and stirred overnight. The reaction mixture was then cooled to 0 °C and quenched with saturated aqueous NH<sub>4</sub>Cl. The solid aluminum salts were filtered, then the organic layer was separated and the aqueous layer was extracted with EtOAc (50 mL×3). The combined organic layer was dried over Na<sub>2</sub>SO<sub>4</sub>, filtered, and concentrated under reduced pressure. The crude residue was subjected to flash chromatography (EtOAc/petroleum ether = 1/3~1/1) to afford the corresponding allylic alcohol (1.4 g, 47% yield).

### 2.3. Method C:

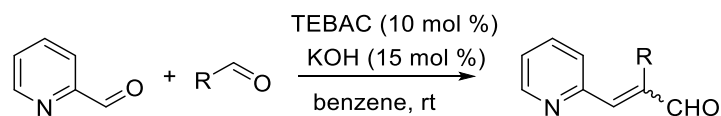

The solution of picolinaldehyde (18 mmol) in benzene (10 mL) and the solution of propionaldehyde (21.6 mmol) in benzene (10 mL) were added successively to vigorously stirred suspension of powdery KOH (2.7 mmol) and TEBAC (1.8 mmol) in benzene (10 mL) at room temperature. The reaction mixture was vigorously stirred at the same temperature until the condensation was finished (TLC monitoring). The organic solution was decanted from the wet TEBAC/KOH solid phase, and the residue was extracted with benzene (3×10 mL). The combined benzene extract was washed with water (2×10 mL) and dried over anhydrous Na<sub>2</sub>SO<sub>4</sub>. The solvent was evaporated under reduced pressure, and the residue was used in the next step without further purification.

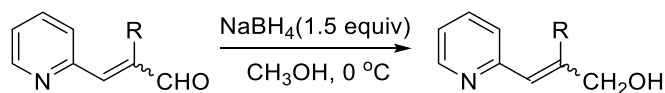

The residue of step 1 and CH<sub>3</sub>OH (20 mL) were added to 100 mL flask. Then NaBH<sub>4</sub> was carefully added in a few portions at 0 °C. The reaction mixture was stirred until the reaction was finished (TLC monitoring). The reaction mixture was quenched with NH<sub>4</sub>Cl and concentrated under reduced pressure. After removing most of the solvent, the residue was extracted with EtOAc (20 mL×3). The EtOAc extract was dried over anhydrous Na<sub>2</sub>SO<sub>4</sub>. The solvent was removed under reduced pressure and the residue was purified by flash column chromatography on silica gel and eluted with EtOAc/petroleum ether (1/3~1/1) to afford 2-methyl-3-(pyridin-2-yl)prop-2-en-1-ol (21 g, 78% yield).

## 2.4. Method D:

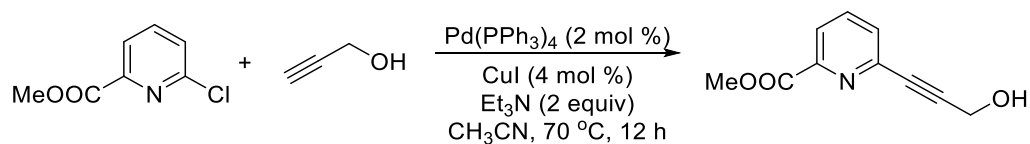

Ethyl 2-chloronicotinate (3.42 g, 20 mmol), prop-2-yn-1-ol (26 mmol, 1.3 equiv), Pd(PPh<sub>3</sub>)<sub>4</sub> (0.6 mmol, 2 mol %), CuI (2.7 mmol, 4 mol %), Et<sub>3</sub>N (60 mmol) and CH<sub>3</sub>CN (50 mL) were added to a 250 mL Schlenk flask under nitrogen atmosphere. The reaction mixture was stirred at 70 °C for 12 hours and monitored by TLC. Then the reaction mixture was concentrated under reduced pressure, The ethyl 2-(3-hydroxyprop-1-yn-1-yl)nicotinate, thus obtained, was used in the next step without further purification.

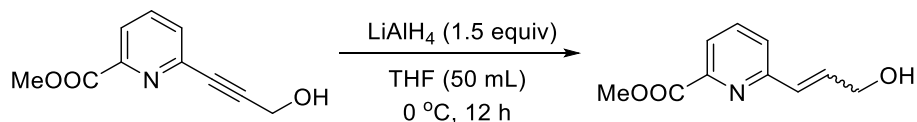

The above residue and anhydrous THF (50 mL) were added to 100 mL flask under nitrogen atmosphere. Then LiAlH<sub>4</sub> was carefully added in a few portions at 0 °C. The reaction mixture was gradually warmed to room temperature and stirred overnight. The reaction mixture was then cooled to 0 °C and quenched with EtOAc, followed by water. The solid aluminum salts was filtered, then the organic layer was separated and the aqueous layer was extracted with EtOAc (20 mL×3). The combined organic layer was dried over Na<sub>2</sub>SO<sub>4</sub>, filtered, and concentrated under reduced pressure. The crude residue was purified by flash column chromatography on silica gel and eluted with EtOAc/petroleum ether (1/3~1/1) afford 3-(3-(hydroxymethyl)pyridin-2-yl)prop-2-en-1-ol (1.97 g, 51% yield).

### 3. Experimental characterization data for starting materials

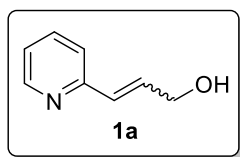

**3-(Pyridin-2-yl)prop-2-en-1-ol (1a):** The title compound was prepared according to the general procedure (method A) and purified by flash column chromatography to give the corresponding product as a yellow oil (56% yield, *E/Z* = 70:30).  $^1\text{H NMR}$  (400 MHz,  $\text{CDCl}_3$ )  $\delta$  2.94 (br, 1H), 4.39 (dd,  $J_1 = 1.6$  Hz,  $J_2 = 4.8$  Hz, 2H), 6.73(t,  $J = 1.5$  Hz, 0.3H), 6.77 (t,  $J = 1.5$  Hz, 0.7H), 6.82 (t,  $J = 4.8$  Hz, 0.7H), 6.86 (t,  $J = 4.8$  Hz, 0.3H), 7.12-7.15 (m, 1H), 7.27-7.31 (m, 1H), 7.61-7.65 (m, 1H), 8.53-8.54 (m, 1H);  $^{13}\text{C NMR}$  (100 MHz,  $\text{CDCl}_3$ )  $\delta$  63.1, 121.7, 122.3, 129.7, 134.1, 136.8, 149.5, 155.4; **HRMS (ESI)** calcd. for  $\text{C}_8\text{H}_{10}\text{NO}$  [ $\text{M}+\text{H}$ ]: 136.0757, found: 136.0766.

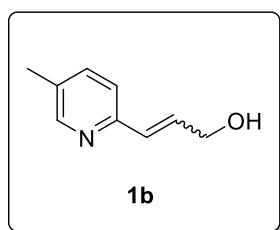

**3-(5-Methylpyridin-2-yl)prop-2-en-1-ol (1b):** The title compound was prepared according to the general procedure (method A) and purified by flash column chromatography to give the corresponding product as a yellow oil (66% yield, *E/Z* = 76:24).  $^1\text{H NMR}$  (400 MHz,  $\text{CDCl}_3$ )  $\delta$  2.32 (s, 3H), 2.34 (br, 1H), 4.38 (d,  $J = 4.2$  Hz, 2H), 6.68 (t,  $J = 1.2$  Hz, 0.2H), 6.72 (t,  $J = 1.2$  Hz, 0.8H), 6.76 (t,  $J = 4.8$  Hz, 0.7H), 6.80 (t,  $J = 4.8$  Hz, 0.3H), 7.21(d,  $J = 8.0$  Hz, 1H), 7.43 (dd,  $J_1 = 1.6$  Hz,  $J_2 = 8.0$  Hz, 1H), 8.37 (d,  $J = 2.4$  Hz, 1H);  $^{13}\text{C NMR}$  (100 MHz,  $\text{CDCl}_3$ )  $\delta$  18.4, 63.3, 121.2, 130.0, 131.9, 132.7, 137.2, 150.0, 152.7; **HRMS (ESI)** calcd. for  $\text{C}_9\text{H}_{12}\text{NO}$  [ $\text{M}+\text{H}$ ]: 150.0913, found: 150.0917.

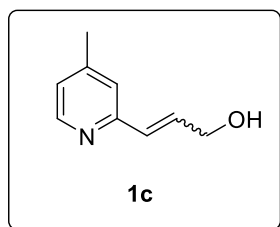

**3-(4-Methylpyridin-2-yl)prop-2-en-1-ol (1c):** The title compound was prepared according to the general procedure (method A) and purified by flash column chromatography to give the corresponding product as a yellow oil (65% yield, *E/Z* = 69:31).  $^1\text{H NMR}$  (400 MHz,  $\text{CDCl}_3$ )  $\delta$  2.33 (s, 3H), 2.96 (br, 1H), 4.36(dd,  $J_1 = 1.6$  Hz,  $J_2 = 4.8$  Hz, 2H), 6.68 (t,  $J = 1.5$  Hz, 0.3H), 6.72 (t,  $J = 1.2$  Hz, 0.7H), 6.78 (t,  $J = 4.8$  Hz, 0.7H), 6.82 (t,  $J = 4.8$  Hz, 0.3H), 6.94-9.96 (m, 1H), 7.11 (t,  $J = 1.0$  Hz, 1H), 8.36 (d,  $J = 4.8$  Hz, 1H);  $^{13}\text{C NMR}$  (100 MHz,  $\text{CDCl}_3$ )  $\delta$  21.1, 62.9, 122.6, 123.3, 129.6, 134.1, 147.9, 149.1, 155.2; **HRMS (ESI)** calcd. for

C<sub>9</sub>H<sub>12</sub>NO [M+H]: 150.0913, found: 150.0968.

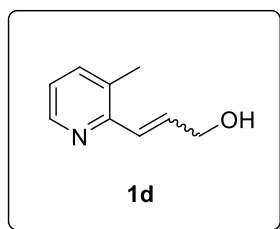

**3-(3-Methylpyridin-2-yl)prop-2-en-1-ol (1d):** The title compound was prepared according to the general procedure (method A) and purified by flash column chromatography to give the corresponding product as a yellow oil (57% yield, *E/Z* = 94:6). <sup>1</sup>H NMR (400 MHz, CDCl<sub>3</sub>) δ 2.28 (s, 3H), 4.35 (d, *J* = 3.1 Hz, 3H), 6.69 (s, 0.1H), 6.73 (s, 0.9H), 6.73 (d, *J* = 3.6 Hz, 0.9H), 6.77 (d, *J* = 3.6 Hz, 0.1H), 7.19 (d, *J* = 8.0 Hz, 1H), 7.40-7.43 (m, 1H), 8.32 (d, *J* = 2.0 Hz, 1H); <sup>13</sup>C NMR (100 MHz, CDCl<sub>3</sub>) δ 18.2, 62.7, 121.0, 129.3, 131.7, 133.5, 137.3, 149.6, 152.9; HRMS (ESI) calcd. for C<sub>9</sub>H<sub>12</sub>NO [M+H]: 150.0913, found: 150.0915.

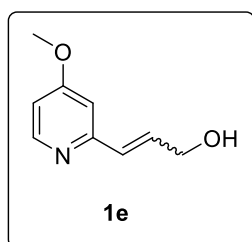

**3-(4-Methoxypyridin-2-yl)prop-2-en-1-ol (1e):** The title compound was prepared according to the general procedure (method A) and purified by flash column chromatography to give the corresponding product as a yellow oil (70% yield, *E/Z* = 85:15). <sup>1</sup>H NMR (400 MHz, CDCl<sub>3</sub>) δ 3.12 (br, 1H), 3.77 (s, 3H), 4.27 (d, *J* = 3.9 Hz, 2H), 6.55 (t, *J* = 3.7 Hz, 0.1H), 6.59 (t, *J* = 3.7 Hz, 0.9H), 6.61 (s, 0.9H), 6.65 (s, 0.1H), 7.06 (dd, *J*<sub>1</sub> = 2.9 Hz, *J*<sub>2</sub> = 8.6 Hz, 1H), 7.17 (d, *J* = 8.6 Hz, 1H), 8.15 (d, *J* = 3.0 Hz, 1H); <sup>13</sup>C NMR (100 MHz, CDCl<sub>3</sub>) δ 55.6, 63.0, 121.1, 121.8, 129.3, 131.6, 136.8, 148.1, 154.7; HRMS (ESI) calcd. for C<sub>9</sub>H<sub>12</sub>NO<sub>2</sub> [M+H]: 166.0863, found: 166.0859.

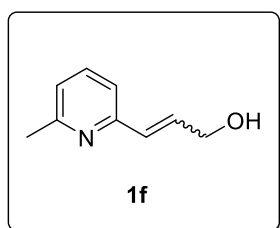

**3-(6-Methylpyridin-2-yl)prop-2-en-1-ol (1f):** The title compound was prepared according to the general procedure (method A) and purified by flash column chromatography to give the corresponding product as a yellow oil (43% yield, *E/Z* = 90:10). <sup>1</sup>H NMR (400 MHz, CDCl<sub>3</sub>) δ 2.53 (s, 3H), 3.17 (br, 1H), 4.36 (d, *J* = 3.2 Hz, 2H), 6.70 (s, 0.1H), 6.74 (s, 0.9H), 6.75 (d, *J* = 3.6 Hz, 0.9H), 6.79 (d, *J* = 3.6 Hz, 0.1H), 6.98 (d, *J* = 8.0 Hz, 1H), 7.12 (d, *J* = 7.8 Hz, 1H), 7.51 (t, *J* = 7.6 Hz, 1H); <sup>13</sup>C NMR (100 MHz, CDCl<sub>3</sub>) δ 24.4, 62.8, 118.5, 121.9, 129.8, 134.0, 137.0, 155.0, 158.1; HRMS (ESI) calcd. for C<sub>9</sub>H<sub>12</sub>NO [M+H]: 150.0913, found: 150.0918.



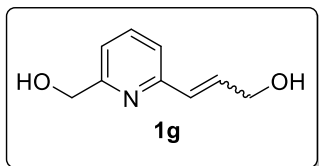

**3-(3-(Hydroxymethyl)pyridin-2-yl)prop-2-en-1-ol (1g):**

The title compound was prepared according to the general procedure (method **D**) and purified by flash column chromatography to give the corresponding product as a yellow oil (39% yield, *E/Z* = 63:37). <sup>1</sup>H NMR (400 MHz, CDCl<sub>3</sub>) δ 3.45 (br, 2H), 4.34 (dd, *J*<sub>1</sub> = 1.6 Hz, *J*<sub>2</sub> = 4.8 Hz, 2H), 4.71 (s, 2H), 6.66 (t, *J* = 1.7 Hz, 0.4H), 6.70 (t, *J* = 1.7 Hz, 0.6H), 6.80 (t, *J* = 0.9 Hz, 0.6H), 6.84 (t, *J* = 0.9 Hz, 0.4H), 7.09 (d, *J* = 7.6 Hz, 1H), 7.14 (d, *J* = 7.6 Hz, 1H), 7.62 (t, *J* = 7.6 Hz, 1H); <sup>13</sup>C NMR (100 MHz, CDCl<sub>3</sub>) δ 63.0, 64.0, 119.1, 120.4, 129.2, 134.1, 137.4, 154.0, 158.6; HRMS (ESI) calcd. for C<sub>9</sub>H<sub>12</sub>NO<sub>2</sub> [M+H]: 166.0868, found: 166.0935.

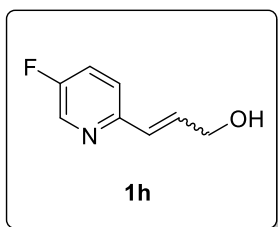

**3-(5-Fluoropyridin-2-yl)prop-2-en-1-ol (1h):**

The title compound was prepared according to the general procedure (method **A**) and purified by flash column chromatography to give the corresponding product as a yellow oil (85% yield, *E/Z* = 91:9). <sup>1</sup>H NMR (400 MHz, CDCl<sub>3</sub>) δ 3.03 (br, 1H), 4.38 (d, *J* = 4.0 Hz, 2H), 6.69 (s, 0.1H), 6.73 (s, 0.9H), 6.75 (d, *J* = 10.8 Hz, 0.9H), 6.78 (d, *J* = 10.8 Hz, 0.1H), 7.27-7.38 (m, 2H), 8.38 (d, *J* = 2.6 Hz, 1H); <sup>13</sup>C NMR (100 MHz, CDCl<sub>3</sub>) δ 62.7, 122.3 (d, *J* = 4.0 Hz), 123.5 (d, *J* = 19.0 Hz), 128.3, 134.1 (d, *J* = 3.0 Hz), 137.5 (d, *J* = 2.4 Hz), 151.8 (d, *J* = 4.0 Hz), 159.5 (d, *J* = 254 Hz); <sup>19</sup>F NMR (376 MHz, CDCl<sub>3</sub>) δ -128.8; HRMS (ESI) calcd. for C<sub>8</sub>H<sub>9</sub>FNO [M+H]: 154.0663, found: 150.0664.

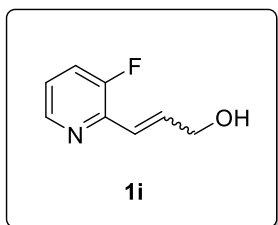

**3-(3-Fluoropyridin-2-yl)prop-2-en-1-ol(1i):**

The title compound was prepared according to the general procedure (method **A**) and purified by flash column chromatography to give the corresponding product as a yellow oil (54% yield, *E/Z* = 67:33). <sup>1</sup>H NMR (400 MHz, CDCl<sub>3</sub>) δ 4.41 (d, *J* = 2.1 Hz, 3H), 6.90 (d, *J* = 1.4 Hz, 0.3H), 6.94 (d, *J* = 1.4 Hz, 0.7H), 7.01 (t, *J* = 3.5 Hz, 0.7H), 7.01 (t, *J* = 3.5 Hz, 0.3H), 7.12-7.16 (m, 1H), 7.31-7.36 (m, 1H), 8.31 (d, *J* = 4.8 Hz, 1H); <sup>13</sup>C NMR (100 MHz, CDCl<sub>3</sub>) δ 62.7, 121.3, 123.1 (d, *J* = 4.0 Hz), 123.4 (d, *J* = 19.0 Hz), 136.8 (d, *J* = 5.0 Hz), 143.8 (d, *J* = 12.0 Hz), 144.8 (d, *J* = 6.0 Hz),

156.8 (d,  $J = 259.0$  Hz);  $^{19}\text{F}$  NMR  $\delta$  -126.07 (376 MHz  $\text{CDCl}_3$ ); **HRMS (ESI)** calcd. for  $\text{C}_8\text{H}_9\text{FNO}$  [ $\text{M}+\text{H}$ ]: 154.0663, found: 150.0668.

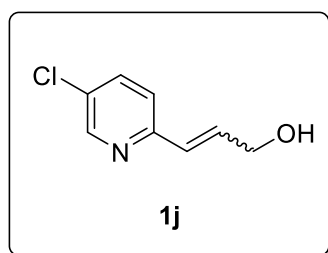

**3-(5-Chloropyridin-2-yl)prop-2-en-1-ol (1j):** The title compound was prepared according to the general procedure (method A) and purified by flash column chromatography to give the corresponding product as a yellow oil (58% yield,  $E/Z = 67:33$ ).  $^1\text{H}$  NMR (400 MHz,  $\text{CDCl}_3$ )  $\delta$  3.10 (t,  $J = 5.4$  Hz, 1H), 4.38 (t,  $J = 4.3$  Hz, 2H), 6.68 (t,  $J = 1.7$  Hz, 0.3H),

6.72 (t,  $J = 1.7$  Hz, 0.7H), 6.79 (t,  $J = 4.8$  Hz, 0.7H), 6.83 (t,  $J = 4.8$  Hz, 0.3H), 7.21 (d,  $J = 8.4$  Hz, 1H), 7.58 (dd,  $J_1 = 2.8$  Hz,  $J_2 = 8.4$  Hz, 1H), 8.46 (d,  $J = 2.4$  Hz, 1H);  $^{13}\text{C}$  NMR (100 MHz,  $\text{CDCl}_3$ )  $\delta$  62.8, 122.3, 128.4, 130.3, 134.9, 136.4, 148.3, 153.6; **HRMS (ESI)** calcd. for  $\text{C}_8\text{H}_9\text{ClNO}$  [ $\text{M}+\text{H}$ ]: 170.0367, found: 170.0360.

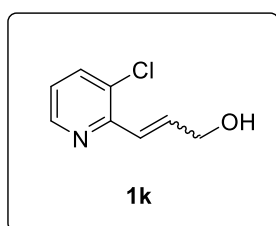

**3-(3-Chloropyridin-2-yl)prop-2-en-1-ol (1k):** The title compound was prepared according to the general procedure (method A) and purified by flash column chromatography to give the corresponding product as a yellow oil (59% yield,  $E/Z = 77:23$ ).  $^1\text{H}$  NMR (400 MHz,  $\text{CDCl}_3$ )  $\delta$  2.35 (br, 1H),

4.44 (dd,  $J_1 = 1.6$  Hz,  $J_2 = 4.4$  Hz, 2H), 7.06-7.14 (m, 2H), 7.14 (t,  $J = 1.5$  Hz, 0.8H), 7.18 (t,  $J = 1.5$  Hz, 0.2H), 7.64 (dd,  $J_1 = 1.2$  Hz,  $J_2 = 8.0$  Hz, 1H), 8.44 (dd,  $J_1 = 1.6$  Hz,  $J_2 = 4.8$  Hz, 1H);  $^{13}\text{C}$  NMR (100 MHz,  $\text{CDCl}_3$ )  $\delta$  63.2, 123.1, 124.4, 130.3, 137.0, 137.6, 147.5, 151.9; **HRMS (ESI)** calcd. for  $\text{C}_8\text{H}_9\text{ClNO}$  [ $\text{M}+\text{H}$ ]: 170.0373, found: 170.0449.

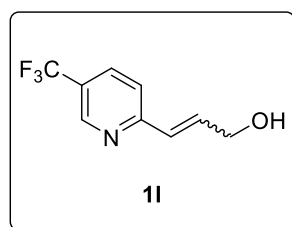

**3-(5-(Trifluoromethyl)pyridin-2-yl)prop-2-en-1-ol (1l):**

The title compound was prepared according to the general procedure (method A) and purified by flash column chromatography to give the corresponding product as a yellow oil (58% yield,  $E/Z = 58:42$ ).  $^1\text{H}$  NMR (400 MHz,  $\text{CDCl}_3$ )  $\delta$  2.85 (br, 1H), 4.43 (dd,  $J_1 = 2.0$  Hz,  $J_2 = 4.8$  Hz, 2H), 6.79 (t,  $J = 1.9$  Hz,

0.4H), 6.83 (t,  $J = 1.9$  Hz, 0.6H), 6.97 (t,  $J = 4.6$  Hz, 0.6H), 7.01 (t,  $J = 4.6$  Hz, 0.4H), 7.38 (d,  $J = 8.0$  Hz, 1H), 7.84 (dd,  $J_1 = 2.4$  Hz,  $J_2 = 8.4$  Hz, 1H), 8.78-8.79 (m, 1H);

$^{13}\text{C}$  NMR (100 MHz,  $\text{CDCl}_3$ )  $\delta$  62.7, 121.3, 122.3, 124.8 (dd,  $J_1 = 66.0$  Hz,  $J_2 = 30.0$  Hz), 128.1, 133.9 (dd,  $J_1 = 7.0$  Hz,  $J_2 = 3.0$  Hz), 137.3, 146.4 (dd,  $J_1 = 9.0$  Hz,  $J_2 = 4.0$  Hz), 158.6 (d,  $J = 2.0$  Hz);  $^{19}\text{F}$  NMR (376 MHz  $\text{CDCl}_3$ )  $\delta$  -62.3; **HRMS (ESI)** calcd. for  $\text{C}_9\text{H}_9\text{F}_3\text{NO}$  [ $\text{M}+\text{H}$ ]: 204.0626, found: 204.0770.

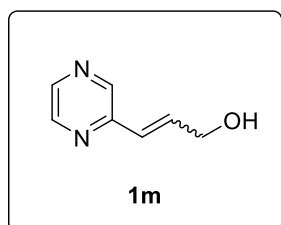

**3-(Pyrimidin-4-yl)prop-2-en-1-ol (1m):** The title compound was prepared according to the general procedure (method **A**) and purified by flash column chromatography to give the corresponding product as a yellow oil (42% yield,  $E/Z = 56:44$ ).  $^1\text{H}$  NMR (400 MHz,  $\text{CDCl}_3$ )  $\delta$  2.83 (br, 1H), 4.42 (dd,  $J_1 = 2.0$  Hz,  $J_2 = 4.4$  Hz, 2H), 6.83 (t,  $J = 2.0$  Hz, 0.4H), 6.87 (t,  $J = 2.0$  Hz, 0.6H), 7.11 (t,  $J = 4.9$  Hz, 1H), 7.24 (t,  $J = 4.5$  Hz, 0.6H), 7.29 (t,  $J = 4.5$  Hz, 0.4H), 8.66 (d,  $J = 4.9$  Hz, 1H);  $^{13}\text{C}$  NMR (100 MHz,  $\text{CDCl}_3$ )  $\delta$  62.4, 118.9, 128.3, 140.8, 157.1, 164.3; **HRMS (ESI)** calcd. for  $\text{C}_7\text{H}_9\text{N}_2\text{O}$  [ $\text{M}+\text{H}$ ]: 137.0715, found: 137.0775.

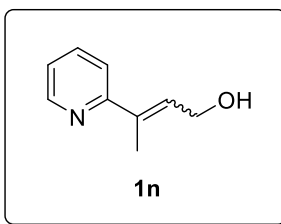

**3-(Pyridin-2-yl)but-2-en-1-ol (1n):** The title compound was prepared according to the general procedure (method **B**) and purified by flash column chromatography to give the corresponding product as a yellow oil (59% yield,  $E/Z = 56:44$ ).  $^1\text{H}$  NMR (400 MHz,  $\text{CDCl}_3$ )  $\delta$  2.09 (br, 1H), 2.13 (d,  $J = 1.2$  Hz, 3H), 4.43 (dd,  $J_1 = 1.2$  Hz,  $J_2 = 6.4$  Hz, 2H), 6.48-6.52 (m, 1H), 7.14-7.18 (m, 1H), 7.43 (t,  $J = 1.0$  Hz, 0.4H), 7.45 (t,  $J = 1.0$  Hz, 0.6H), 7.63-7.67 (m, 1H), 8.56-8.58 (m, 1H);  $^{13}\text{C}$  NMR (100 MHz,  $\text{CDCl}_3$ )  $\delta$  14.7, 60.1, 120.1, 122.1, 130.0, 136.6, 136.9, 149.0, 159.3; **HRMS (ESI)** calcd. for  $\text{C}_9\text{H}_{12}\text{NO}$  [ $\text{M}+\text{H}$ ]: 150.0913, found: 150.0968.

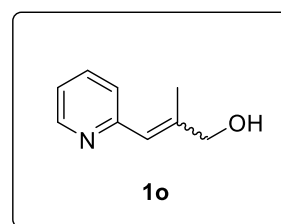

**2-Methyl-3-(pyridin-2-yl)prop-2-en-1-ol (1o):** The title compound was prepared according to the general procedure (method **C**) and purified by flash column chromatography to give the corresponding product as a yellow oil (58% yield,  $E/Z > 99:1$ ).  $^1\text{H}$  NMR (400 MHz,  $\text{CDCl}_3$ )  $\delta$  2.01 (s, 3H), 2.95 (br, 1H), 4.20 (d,  $J = 1.6$  Hz, 2H), 6.65 (d,  $J = 1.6$  Hz, 1H), 7.09-7.13 (m, 1H), 7.26 (d,  $J = 8.2$  Hz, 1H), 7.64 (m, 1H), 8.56-8.58 (m, 1H);  $^{13}\text{C}$  NMR (100 MHz,

CDCl<sub>3</sub>)  $\delta$  15.5, 68.1, 121.2, 123.3, 124.2, 136.3, 143.1, 149.0, 156.9; **HRMS (ESI)** calcd. for C<sub>9</sub>H<sub>12</sub>NO [M+H]: 150.0913, found: 150.0993.

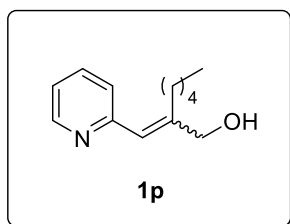

**2-(Pyridin-2-ylmethylene)heptan-1-ol (1p):** The title compound was prepared according to the general procedure (method C) and purified by flash column chromatography to give the corresponding product as a yellow oil (61% yield, *E/Z* > 99:1). **<sup>1</sup>H NMR** (400 MHz, CDCl<sub>3</sub>)  $\delta$  0.82-0.85 (m, 3H), 1.25-1.26 (m, 4H), 1.42-1.49 (m, 2H), 2.41-2.45 (m, 2H), 4.23 (s, 2H), 4.93 (br, 1H), 6.65 (s, 1H), 7.06-7.10 (m, 1H), 7.20 (d, *J* = 8.0 Hz, 1H), 7.59-7.63 (m, 1H), 8.52-8.54 (m, 1H); **<sup>13</sup>C NMR** (100 MHz, CDCl<sub>3</sub>)  $\delta$  14.0, 22.4, 28.0, 28.9, 32.0, 65.8, 121.0, 122.9, 123.8, 136.2, 147.9, 148.8, 157.0; **HRMS (ESI)** calcd. for C<sub>13</sub>H<sub>20</sub>NO [M+H]: 206.1539, found: 206.1545.

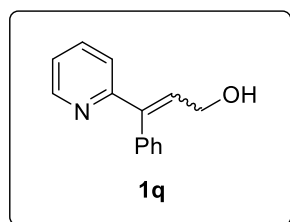

**3-Phenyl-3-(pyridin-2-yl)prop-2-en-1-ol (1q):** The title compound was prepared according to the general procedure (method B) and purified by flash column chromatography to give the corresponding product as a yellow oil (64% yield, *E/Z* = 72:28). **<sup>1</sup>H NMR** (400 MHz, CDCl<sub>3</sub>)  $\delta$  3.08 (br, 1H), 4.47 (dd, *J*<sub>1</sub> = 1.6 Hz, *J*<sub>2</sub> = 4.4 Hz, 2H), 6.91 (t, *J* = 4.4 Hz, 0.3H), 6.95 (t, *J* = 4.4 Hz, 0.7H), 6.99 (t, *J* = 1.6 Hz, 0.7H), 7.03 (t, *J* = 1.6 Hz, 0.7H), 7.44-7.55 (m, 4H), 7.64-7.72 (m, 2H), 7.77 (dd, *J*<sub>1</sub> = 1.6 Hz, *J*<sub>2</sub> = 8.4 Hz, 1H), 8.05-8.10 (m, 2H); **<sup>13</sup>C NMR** (100 MHz, CDCl<sub>3</sub>)  $\delta$  67.0, 121.3, 123.9, 125.2, 127.7, 128.4, 128.7, 135.7, 138.3, 147.2, 148.7, 156.1; **HRMS (ESI)** calcd. for C<sub>14</sub>H<sub>14</sub>NO [M+H]: 212.1070, found: 212.1072.

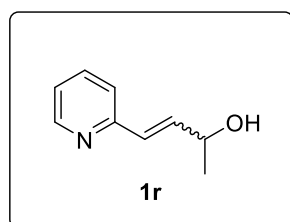

**4-(Pyridin-2-yl)but-3-en-2-ol (1r):** The title compound was prepared according to the general procedure (method A) and purified by flash column chromatography to give the corresponding product as a yellow oil (57% yield, *E/Z* = 69:31). **<sup>1</sup>H NMR** (400 MHz, CDCl<sub>3</sub>)  $\delta$  1.40 (d, *J* = 6.8 Hz, 3H), 2.28 (br, 1H), 4.53-4.59 (m, 1H), 6.66 (s, 0.3H), 6.70 (s, 0.7H), 6.76 (d, *J* = 8.0 Hz, 0.7H), 6.80 (d, *J* = 8.0 Hz, 0.3H), 7.12-7.15 (m, 1H), 7.27-7.30 (m, 1H), 7.61-7.65 (m, 1H), 8.54-8.56 (m, 1H); **<sup>13</sup>C NMR** (100 MHz, CDCl<sub>3</sub>)  $\delta$  23.4, 68.4,

121.9, 122.3, 128.8, 136.7, 138.5, 149.6, 155.4; **HRMS (ESI)** calcd. for C<sub>9</sub>H<sub>12</sub>NO  
[M+H]: 150.0913, found: 150.0968.

#### 4. General procedure for the synthesis of product

A mixture of catalyst, ligand, and allylic alcohols were added into a glass tube which was placed in an autoclave. Then the autoclave was purged and charged with CO at the designed pressure. The reaction mixture was stirred at the designed temperature for 12 hours. After the reaction finished, the autoclave was cooled to room temperature and the pressure was carefully released. The yield was determined by GC analysis relative to the **1** with *n*-hexadecane as internal standard. Then the corresponding reaction mixture was purified by flash column chromatography on a silica gel column EtOAc/petroleum ether (1/50~1/10) to give the desired product.

## 5. Optimization of the reaction conditions

**Table S1. Screening of the [Pd] catalysts.<sup>a</sup>**

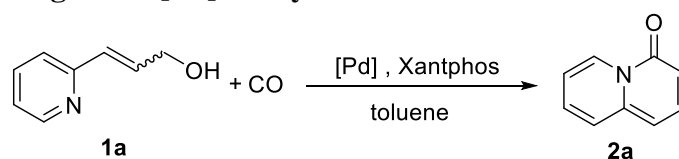

| Entry    | [Pd]                                                | Yield (%) <sup>b</sup> |
|----------|-----------------------------------------------------|------------------------|
| 1        | PdI <sub>2</sub>                                    | 20                     |
| 2        | PdBr <sub>2</sub>                                   | 70                     |
| <b>3</b> | <b>PdCl<sub>2</sub></b>                             | <b>88</b>              |
| 4        | Pd(TFA) <sub>2</sub>                                | 51                     |
| 5        | [Pd(allyl)Cl] <sub>2</sub>                          | 75                     |
| 6        | Pd(OAc) <sub>2</sub>                                | 54                     |
| 7        | Pd <sub>2</sub> (dba) <sub>3</sub>                  | ND                     |
| 8        | Pd(CH <sub>3</sub> CN) <sub>2</sub> Cl <sub>2</sub> | 79                     |

<sup>a</sup> Reaction conditions: **1a** (0.5 mmol), [Pd] (0.025 mmol, 5 mol %), Xantphos (0.03 mmol, 6 mol %), toluene (2 mL), CO (20 atm), 120 °C, 12 h. <sup>b</sup> Yields were determined by GC analysis using *n*-hexadecane as an internal standard.

**Table S2. Screening of the ligands.<sup>a</sup>**

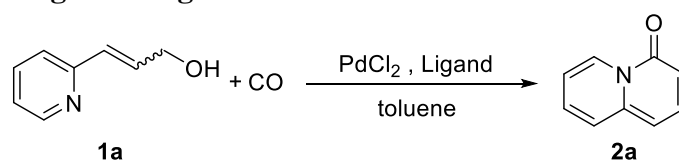

| Entry    | Ligand                                         | Yield (%) <sup>b</sup> |
|----------|------------------------------------------------|------------------------|
| <b>1</b> | <b>XantPhos</b>                                | <b>88</b>              |
| 2        | DPPM                                           | 34                     |
| 3        | DPPE                                           | 33                     |
| 4        | DPPB                                           | 16                     |
| 5        | DPPF                                           | 20                     |
| 6        | PPh <sub>3</sub>                               | 25 <sup>c</sup>        |
| 7        | P( <i>o</i> -Tolyl) <sub>3</sub>               | Trace <sup>c</sup>     |
| 8        | P( <i>m</i> -Tolyl) <sub>3</sub>               | Trace <sup>c</sup>     |
| 9        | PCy <sub>3</sub>                               | 16 <sup>c</sup>        |
| 10       | P(C <sub>6</sub> F <sub>5</sub> ) <sub>3</sub> | 23 <sup>c</sup>        |
| 11       | DPEPhos                                        | 41                     |

<sup>a</sup> Reaction conditions: **1a** (0.5 mmol), PdCl<sub>2</sub> (0.025 mmol, 5 mol%), ligands (0.03 mmol, 6 mol %), toluene (2 mL), CO (20 atm), 120 °C, 12 h. Yields were determined by GC analysis using *n*-hexadecane as an internal standard. <sup>b</sup> Yields were determined by GC analysis using *n*-hexadecane as an internal standard. <sup>c</sup> Ligand (12 mol%).

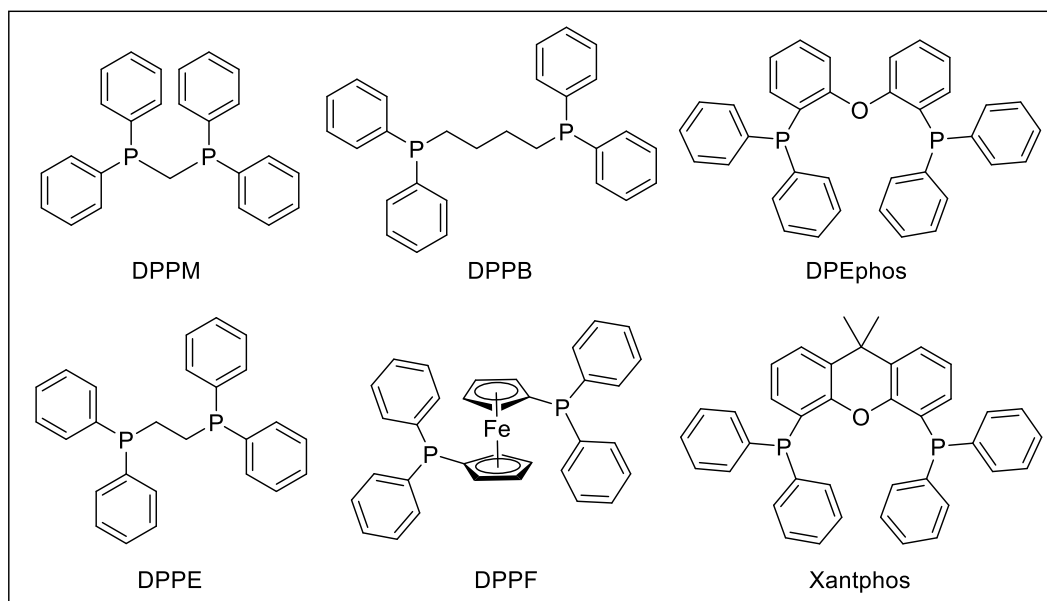

**Table S3. Screening of the solvents.<sup>a</sup>**

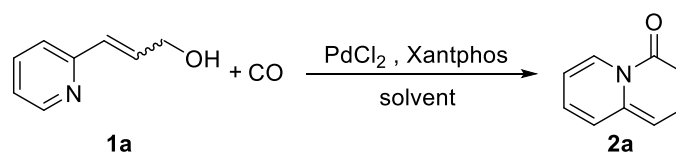

| Entry | Solvent            | Yield (%) <sup>b</sup> |
|-------|--------------------|------------------------|
| 1     | toluene            | 88                     |
| 2     | <i>i</i> -PrOH     | 58                     |
| 3     | THF                | 62                     |
| 4     | CH <sub>3</sub> CN | 55                     |
| 5     | NMP                | 67                     |
| 6     | DMF                | trace                  |
| 7     | anisole            | 48                     |
| 8     | xylene             | 85                     |
| 9     | mesitylene         | 81                     |
| 10    | PhCF <sub>3</sub>  | 70                     |

<sup>a</sup> Reaction conditions: **1a** (0.5 mmol), PdCl<sub>2</sub> (0.025 mmol, 5 mol %), XantPhos (0.03 mmol, 6 mol %), solvent (2 mL), CO (20 atm), 120 °C, 12 h. <sup>b</sup> Yields were determined by GC analysis using n-hexadecane as an internal standard.



**Table S4. Screening of temperature.<sup>a</sup>**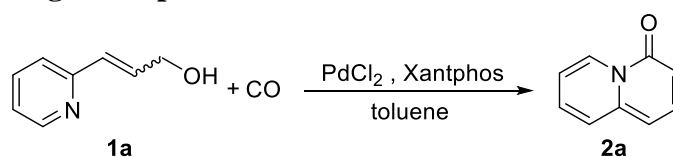

| Entry    | temperature (°C) | Yield (%) <sup>b</sup> |
|----------|------------------|------------------------|
| <b>1</b> | <b>120</b>       | <b>88</b>              |
| 2        | 100              | 87                     |
| 3        | 80               | 86                     |
| 4        | 60               | 62                     |

<sup>a</sup> Reaction conditions: **1a** (0.5 mmol),  $\text{PdCl}_2$  (0.025 mmol, 5 mol %), XantPhos (0.03 mmol, 6 mol %), toluene (2 mL), CO (20 atm), 12 h. <sup>b</sup> Yields were determined by GC analysis using *n*-hexadecane as an internal standard.

**Table S5. Screening of pressure of CO.<sup>a</sup>**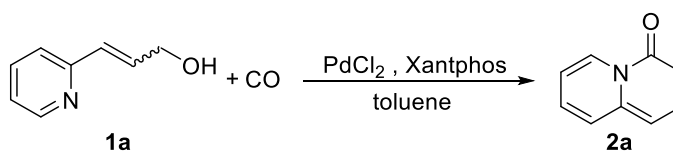

| Entry | pressure of CO (atm) | Yield (%) <sup>b</sup> |
|-------|----------------------|------------------------|
| 1     | 30                   | 88                     |
| 2     | 20                   | 88                     |
| 3     | 10                   | 85                     |
| 4     | 1                    | 85(86) <sup>c</sup>    |

<sup>a</sup> Reaction conditions: **1a** (0.5 mmol),  $\text{PdCl}_2$  (0.025 mmol, 5 mol %), XantPhos(0.03 mmol, 6 mol %), toluene (2 mL), CO, 80 °C, 12 h. <sup>b</sup> Yields were determined by GC analysis using *n*-hexadecane as an internal standard. <sup>c</sup> Isolated yield.

## 6. Experimental characterization data for products

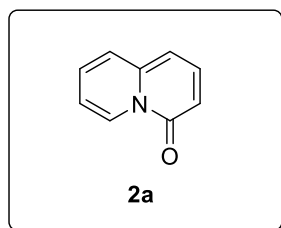

**4H-quinolizin-4-one (2a):** The title compound was prepared according to the general procedure and purified by flash column chromatography to give the corresponding product as a yellow solid, 62 mg, 86% yield.  $^1\text{H NMR}$  (400 MHz,  $\text{CDCl}_3$ )  $\delta$  6.61-6.66 (m, 2H), 6.98-7.02 (m, 1H), 7.31-7.35 (m, 1H), 7.45-7.48 (m, 1H), 7.64-7.68 (m, 1H), 9.12 (dd,  $J_1 = 1.2\text{Hz}$ ,  $J_2 = 7.6\text{Hz}$ , 1H);  $^{13}\text{C NMR}$  (100 MHz,  $\text{CDCl}_3$ )  $\delta$  103.3, 109.2, 115.0, 125.5, 127.4, 129.4, 138.2, 142.8, 158.8; **HRMS (ESI)** calcd. for  $\text{C}_9\text{H}_8\text{NO}$  [ $\text{M}+\text{H}$ ]: 146.0600, found: 146.0605.

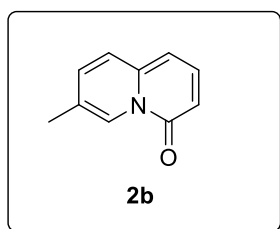

**7-Methyl-4H-quinolizin-4-one (2b):** The title compound was prepared according to the general procedure and purified by flash column chromatography to give the corresponding product as a yellow solid, 64 mg, 80% yield.  $^1\text{H NMR}$  (400 MHz,  $\text{CDCl}_3$ )  $\delta$  2.38 (d,  $J = 1.2\text{ Hz}$ , 3H), 6.63 (dd,  $J_1 = 7.6\text{ Hz}$ ,  $J_2 = 12.4\text{ Hz}$ , 2H), 7.19 (dd,  $J_1 = 1.6\text{ Hz}$ ,  $J_2 = 8.8\text{ Hz}$ , 1H), 7.40 (d,  $J = 8.8\text{ Hz}$ , 1H), 7.59 (dd,  $J_1 = 8.0\text{ Hz}$ ,  $J_2 = 8.8\text{ Hz}$ , 1H), 8.95 (s, 1H);  $^{13}\text{C NMR}$  (100 MHz,  $\text{CDCl}_3$ )  $\delta$  18.7, 103.2, 108.8, 124.6, 125.0, 125.2, 132.5, 137.4, 141.5, 158.5; **HRMS (ESI)** calcd. for  $\text{C}_{10}\text{H}_{10}\text{NO}$  [ $\text{M}+\text{H}$ ]: 160.0757, found: 160.0755.

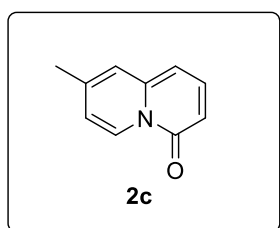

**8-Methyl-4H-quinolizin-4-one (2c):** The title compound was prepared according to the general procedure and purified by flash column chromatography to give the corresponding product as a yellow solid, 72 mg, 91% yield.  $^1\text{H NMR}$  (400 MHz,  $\text{CDCl}_3$ )  $\delta$  2.4 (d,  $J = 1.2\text{ Hz}$ , 3H), 6.50-6.54 (m, 2H), 6.82 (dd,  $J_1 = 2.0\text{ Hz}$ ,  $J_2 = 7.6\text{ Hz}$ , 1H), 7.22-7.23 (m, 1H), 7.58 (dd,  $J_1 = 7.6\text{ Hz}$ ,  $J_2 = 8.4\text{ Hz}$ , 1H), 9.03 (d,  $J = 7.6\text{ Hz}$ , 1H);  $^{13}\text{C NMR}$  (100 MHz,  $\text{CDCl}_3$ )  $\delta$  21.2, 102.2, 107.6, 117.9, 123.4, 126.9, 138.3, 140.8, 143.0, 158.7; **HRMS (ESI)** calcd. for  $\text{C}_{10}\text{H}_{10}\text{NO}$  [ $\text{M}+\text{H}$ ]: 160.0757, found: 160.0754.

**9-Methyl-4H-quinolizin-4-one (2d):** The title compound was prepared according to the general procedure and purified by flash column chromatography to give the

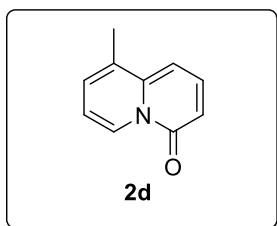

corresponding product as a yellow solid, 52 mg, 65% yield.

**$^1\text{H}$  NMR** (400 MHz,  $\text{CDCl}_3$ )  $\delta$  2.48 (s, 3H), 6.62 (dd,  $J_1 = 1.2$  Hz,  $J_2 = 8.8$  Hz, 1H), 6.67-6.69 (m, 1H), 6.93 (t,  $J = 7.2$  Hz, 1H), 7.19-7.21 (m, 1H), 7.66 (dd,  $J_1 = 8.0$  Hz,  $J_2 = 8.8$  Hz, 1H), 9.08 (dd,  $J_1 = 1.2$  Hz,  $J_2 = 7.6$  Hz, 1H);  **$^{13}\text{C}$  NMR**

(100 MHz,  $\text{CDCl}_3$ )  $\delta$  19.3, 100.0, 109.1, 114.5, 126.0, 129.3, 132.2, 137.8, 143.0, 159.3; **HRMS (ESI)** calcd. for  $\text{C}_{10}\text{H}_{10}\text{NO}$  [ $\text{M}+\text{H}$ ]: 160.0757, found: 160.0862.

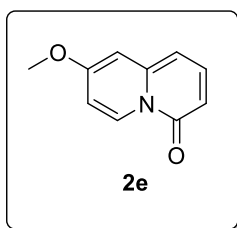

**8-Methoxy-4H-quinolizin-4-one (2e):** The title compound

was prepared according to the general procedure and purified by flash column chromatography to give the the corresponding product as a yellow solid, 56 mg, 64% yield.  **$^1\text{H}$  NMR** (400

MHz,  $\text{CDCl}_3$ )  $\delta$  3.94 (s, 3 H), 6.65 (dd,  $J_1 = 7.6$  Hz,  $J_2 = 14.2$

Hz, 2H), 7.15 (dd,  $J_1 = 2.5$  Hz,  $J_2 = 9.5$  Hz, 1H), 7.42 (d,  $J = 9.5$  Hz, 1H), 7.58 (dd,  $J_1$

$= 7.6$  Hz,  $J_2 = 8.8$  Hz, 1H), 8.67 (d,  $J = 2.4$  Hz, 1H);  **$^{13}\text{C}$  NMR** (100 MHz,  $\text{CDCl}_3$ )  $\delta$

56.1, 103.8, 106.8, 108.7, 125.4, 126.1, 136.1, 139.5, 150.9, 158.2; **HRMS (ESI)**

calcd. for  $\text{C}_{10}\text{H}_{10}\text{NO}_2$  [ $\text{M}+\text{H}$ ]: 176.0706, found: 176.0710.

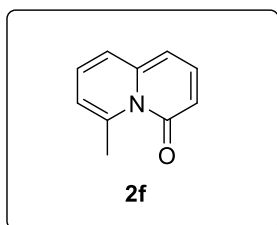

**6-Methyl-4H-quinolizin-4-one (2f):** The title compound

was prepared according to the general procedure and purified by flash column chromatography to give the corresponding product as a yellow solid, 29 mg, 36% yield.

**$^1\text{H}$  NMR** (400 MHz,  $\text{CDCl}_3$ )  $\delta$  3.02 (s, 3 H), 6.42 (s, 1H),

6.44 (s, 1H), 6.45-6.47 (m, 1H), 6.95-6.99 (m, 1H), 7.13 (dd,  $J_1 = 1.2$  Hz,  $J_2 = 8.8$  Hz,

1H), 7.45 (t,  $J = 8.0$  Hz, 1H);  **$^{13}\text{C}$  NMR** (100 MHz,  $\text{CDCl}_3$ )  $\delta$  25.0, 103.8, 112.4,

118.0, 124.6, 128.3, 137.3, 142.9, 145.1, 163.2; **HRMS (ESI)** calcd. for  $\text{C}_{10}\text{H}_{10}\text{NO}$

[ $\text{M}+\text{H}$ ]: 160.0757, found: 160.0754.

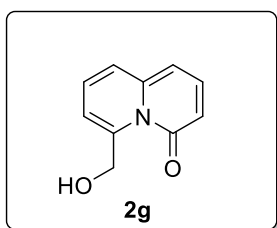

**6-(Hydroxymethyl)-4H-quinolizin-4-one (2g):** The title

compound was prepared according to the general procedure and purified by flash column chromatography to give the corresponding product as a yellow solid, 52 mg, 24% yield.

**<sup>1</sup>H NMR** (400 MHz, CDCl<sub>3</sub>) δ 4.94-5.01 (m, 3H), 6.62-6.67 (m, 2H), 6.78 (dd, *J*<sub>1</sub> = 1.6 Hz, *J*<sub>2</sub> = 6.8 Hz, 1H), 7.11 (dd, *J*<sub>1</sub> = 6.7 Hz, *J*<sub>2</sub> = 8.9 Hz, 1H), 7.35 (dd, *J*<sub>1</sub> = 1.6 Hz, *J*<sub>2</sub> = 8.9 Hz, 1 H), 7.59 (dd, *J*<sub>1</sub> = 7.4 Hz, *J*<sub>2</sub> = 8.7 Hz, 1 H), **<sup>13</sup>C NMR** (100 MHz, CDCl<sub>3</sub>) δ 65.3, 106.1, 113.2, 119.6, 127.2, 128.2, 137.8, 143.5, 144.5, 162.5; **HRMS (ESI)** calcd. for C<sub>10</sub>H<sub>9</sub>NNaO<sub>2</sub> [M+Na]: 198.0525, found: 198.0526.

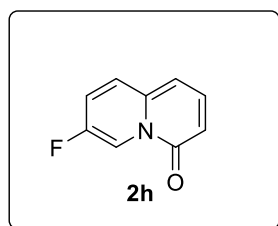

**7-Fluoro-4H-quinolizin-4-one (2h):** The title compound was prepared according to the general procedure and purified by flash column chromatography to give the corresponding product as a yellow solid, 69 mg, 85% yield. **<sup>1</sup>H NMR** (400 MHz, CDCl<sub>3</sub>) δ 6.64 (dd, *J*<sub>1</sub> = 1.2 Hz, *J*<sub>2</sub> = 8.8 Hz, 1H), 6.72 (d, *J* = 7.6 Hz, 1H), 7.25-7.30 (m, 1H), 7.49 (dd, *J*<sub>1</sub> = 5.6 Hz, *J*<sub>2</sub> = 9.6 Hz, 1H), 7.64 (dd, *J*<sub>1</sub> = 7.6 Hz, *J*<sub>2</sub> = 8.8 Hz, 1H), 9.03 (dd, *J*<sub>1</sub> = 2.4 Hz, *J*<sub>2</sub> = 6.0 Hz, 1H); **<sup>13</sup>C NMR** (100 MHz, CDCl<sub>3</sub>) δ 104.1, 109.6, 113.0, 113.4, 122.3, 122.6, 127.4, 127.4, 137.5, 140.5, 153.3, 155.7, 158.2, 158.2; **<sup>19</sup>F NMR** (376 MHz CDCl<sub>3</sub>) δ -133.7; **HRMS (ESI)** calcd. for C<sub>9</sub>H<sub>7</sub>FNO [M+H]: 164.0506, found: 164.0502.

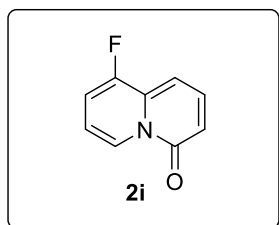

**9-Fluoro-4H-quinolizin-4-one (2i):** The title compound was prepared according to the general procedure and purified by flash column chromatography to give the corresponding product as a yellow solid, 51 mg, 63% yield. **<sup>1</sup>H NMR** (400 MHz, CDCl<sub>3</sub>) δ 6.67 (dd, *J*<sub>1</sub> = 1.2 Hz, *J*<sub>2</sub> = 8.8 Hz, 1H), 6.90 (t, *J* = 7.2 Hz, 1H), 7.07 (d, *J* = 7.6 Hz, 1H), 7.43 (dd, *J*<sub>1</sub> = 1.2 Hz, *J*<sub>2</sub> = 7.2 Hz, 1H), 7.72 (dd, *J*<sub>1</sub> = 8.0 Hz, *J*<sub>2</sub> = 9.2 Hz, 1H), 9.06 (d, *J* = 7.6 Hz, 1H); **<sup>13</sup>C NMR** (100 MHz, CDCl<sub>3</sub>) δ 101.0, 110.8, 113.3, 126.6, 128.9, 129.5, 138.6, 140.3, 158.8; **<sup>19</sup>F NMR** (376 MHz CDCl<sub>3</sub>) δ -122.7; **HRMS (ESI)** calcd. for C<sub>9</sub>H<sub>7</sub>FNO [M+H]: 164.0506, found: 164.0501.

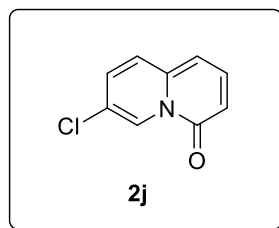

**7-Chloro-4H-quinolizin-4-one (2j):** The title compound was prepared according to the general procedure and purified by flash column chromatography to give the corresponding product as a yellow solid, 63 mg, 70% yield. **<sup>1</sup>H NMR** (400 MHz, CDCl<sub>3</sub>) δ 6.67 (dd, *J*<sub>1</sub> = 1.2 Hz, *J*<sub>2</sub> = 9.2 Hz, 1H), 6.90 (t, *J* = 7.2 Hz, 1H), 7.06

(d,  $J = 8.0$  Hz, 1H), 7.43 (dd,  $J_1 = 1.2$  Hz,  $J_2 = 7.2$  Hz, 1H), 7.71 (dd,  $J_1 = 8.0$  Hz,  $J_2 = 9.2$  Hz, 1H), 9.04 (d,  $J = 7.6$  Hz, 1 H);  $^{13}\text{C}$  NMR (100 MHz,  $\text{CDCl}_3$ )  $\delta$  100.9, 110.8, 113.3, 126.5, 128.7, 129.5, 138.6, 140.2, 158.7; **HRMS (ESI)** calcd. for  $\text{C}_9\text{H}_7\text{ClNO}$  [M+H]: 180.0211, found: 180.0209.

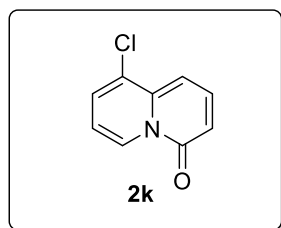

**9-Chloro-4H-quinolizin-4-one (2k):** The title compound was prepared according to the general procedure and purified by flash column chromatography to give the corresponding product as a yellow solid, 56 mg, 63% yield.

$^1\text{H}$  NMR (400 MHz,  $\text{CDCl}_3$ )  $\delta$  6.67 (dd,  $J_1 = 1.2$  Hz,  $J_2 = 9.2$  Hz, 1H), 6.89 (t,  $J = 7.2$  Hz, 1H), 7.07 (d,  $J = 7.6$  Hz, 1H), 7.42 (dd,  $J_1 = 1.2$  Hz,  $J_2 = 7.2$  Hz, 1H), 7.71 (dd,  $J_1 = 8.0$  Hz,  $J_2 = 8.8$  Hz, 1H), 9.04-9.07 (m, 1 H);  $^{13}\text{C}$  NMR (100 MHz,  $\text{CDCl}_3$ )  $\delta$  100.9, 110.7, 113.3, 126.5, 128.9, 129.4, 138.5, 140.2, 158.7; **HRMS (ESI)** calcd. for  $\text{C}_9\text{H}_7\text{ClNO}$  [M+H]: 180.0211, found: 180.0206.

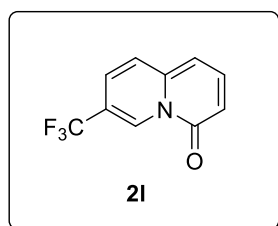

**7-(Trifluoromethyl)-4H-quinolizin-4-one (2l):** The title compound was prepared according to the general procedure and purified by flash column chromatography to give the corresponding product as a yellow solid, 76 mg, 71% yield.

$^1\text{H}$  NMR (400 MHz,  $\text{CDCl}_3$ )  $\delta$  6.63-6.67 (m, 2H), 7.27 (dd,  $J_1 = 1.2$  Hz,  $J_2 = 7.2$  Hz, 1H), 7.46 (d,  $J = 7.2$  Hz, 1H), 7.66 (dd,  $J_1 = 6.0$  Hz,  $J_2 = 7.2$  Hz, 1H), 9.35 (t,  $J = 1.6$  Hz, 1 H);  $^{13}\text{C}$  NMR (100 MHz,  $\text{CDCl}_3$ )  $\delta$  103.9, 111.7, 118.7 (d,  $J = 28.0$  Hz), 124.1 (q,  $J = 2.0$  Hz), 124.2, 126.7 (d,  $J = 5.0$  Hz), 126.8, 139.7, 142.1, 158.7;  $^{19}\text{F}$  NMR (376 MHz  $\text{CDCl}_3$ )  $\delta$  -63.7; **HRMS (ESI)** calcd. for  $\text{C}_{10}\text{H}_7\text{F}_3\text{NO}$  [M+H]: 214.0474, found: 214.0843.

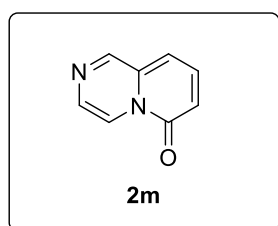

**6H-pyrido[1,2-a]pyrazin-6-one (2m):** The title compound was prepared according to the general procedure and purified by flash column chromatography to give the corresponding product as a yellow solid, 40 mg, 55% yield.  $^1\text{H}$  NMR (400 MHz,  $\text{CDCl}_3$ )  $\delta$  6.87 (s, 1H), 6.89-6.90 (m, 1H), 7.78 (dd,  $J_1 = 7.6$  Hz,  $J_2 = 9.2$  Hz, 1H), 7.89 (d,  $J = 5.2$  Hz, 1H), 8.67-8.69 (m, 1H), 8.88 (d,  $J = 1.2$  Hz, 1H);  $^{13}\text{C}$  NMR (100 MHz,  $\text{CDCl}_3$ )  $\delta$  105.0, 116.0, 117.2, 130.9, 135.6, 138.8,

152.5, 157.4; **HRMS (ESI)** calcd. for  $C_8H_7N_2O$  [M+H]: 147.0553, found: 147.0775.

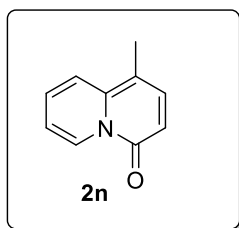

**Methyl-4H-quinolizin-4-one (2n):** The title compound was prepared according to the general procedure and purified by flash column chromatography to give the corresponding product as a yellow solid, 68 mg, 85% yield.  **$^1H$  NMR** (400 MHz,  $CDCl_3$ )  $\delta$  2.41 (s, 3H), 6.57 (d,  $J = 8.8$  Hz, 1H), 7.00-7.04 (m, 1H), 7.36-7.40 (m, 1H), 7.54 (d,  $J = 8.9$  Hz, 1H), 7.58-7.61 (m, 1H), 9.20 (d,  $J = 7.4$  Hz, 1H);  **$^{13}C$  NMR** (100 MHz,  $CDCl_3$ )  $\delta$  17.1, 108.5, 109.4, 114.7, 122.3, 128.0, 129.0, 140.1, 140.5, 158.2; **HRMS (ESI)** calcd. for  $C_{10}H_{10}NO$  [M+H]: 160.0757, found: 160.0888.

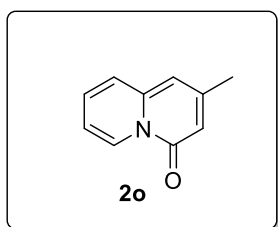

**2-Methyl-4H-quinolizin-4-one (2o):** The title compound was prepared according to the general procedure and purified by flash column chromatography to give the corresponding product as a yellow solid, 72 mg, 90% yield.  **$^1H$  NMR** (400 MHz,  $CDCl_3$ )  $\delta$  2.36 (s, 3 H), 6.44 (dd,  $J_1 = 1.6$  Hz,  $J_2 = 10.4$  Hz, 2H), 6.87-6.91 (m, 1H), 7.24-7.28 (m, 1H), 7.33-7.36 (m, 1H), 9.00-9.03 (m, 1H);  **$^{13}C$  NMR** (100 MHz,  $CDCl_3$ )  $\delta$  21.8, 104.7, 109.3, 114.2, 124.8, 127.0, 129.3, 141.7, 149.9, 158.4; **HRMS (ESI)** calcd. for  $C_{10}H_{10}NO$  [M+H]: 160.0757, found: 160.0801.

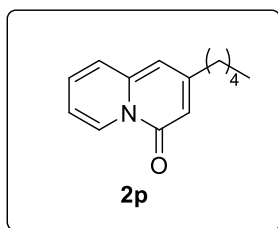

**Pentyl-4H-quinolizin-4-one (2p):** The title compound was prepared according to the general procedure and purified by flash column chromatography to give the corresponding product as a yellow solid, 71 mg, 66% yield.  **$^1H$  NMR** (400 MHz,  $CDCl_3$ )  $\delta$  0.88-0.91 (m, 3H), 1.32-1.36 (m, 4H), 1.63-1.71 (m, 2H), 2.61 (t,  $J = 7.6$  Hz, 2H), 6.48 (dd,  $J_1 = 1.4$  Hz,  $J_2 = 6.4$  Hz, 2H), 6.89-6.92 (m, 1H), 7.24-7.28 (m, 1H), 7.36-7.39 (m, 1H), 9.02 (dd,  $J_1 = 0.8$  Hz,  $J_2 = 7.6$  Hz, 1H);  **$^{13}C$  NMR** (100 MHz,  $CDCl_3$ )  $\delta$  14.1, 22.6, 29.8, 31.5, 36.0, 104.2, 108.8, 114.3, 125.1, 127.2, 129.2, 141.9, 154.6, 158.7; **HRMS (ESI)** calcd. for  $C_{14}H_{18}NO$  [M+H]: 216.1383, found: 216.1386.

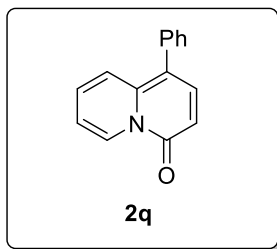

**1-Phenyl-4H-quinolizin-4-one (2q):** The title compound was prepared according to the general procedure and purified by flash column chromatography to give the corresponding product as a yellow solid, 85 mg, 77% yield.  $^1\text{H NMR}$  (400 MHz,  $\text{CDCl}_3$ )  $\delta$  6.87-6.89 (m, 2H), 6.97-7.00 (m, 1H), 7.32-7.36 (m, 1H), 7.43-7.53 (m, 4H), 7.68-7.71 (m, 2H), 9.11 (d,  $J = 7.4$  Hz, 1 H);  $^{13}\text{C NMR}$  (100 MHz,  $\text{CDCl}_3$ )  $\delta$  102.1, 106.6, 114.8, 125.6, 127.2, 127.2, 129.0, 129.2, 129.6, 138.4, 142.3, 150.4, 158.74; **HRMS (ESI)** calcd. for  $\text{C}_{15}\text{H}_{12}\text{NO}$  [ $\text{M}+\text{H}$ ]: 222.0913, found: 222.0913.

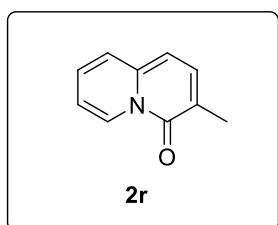

**7-Methyl-4H-quinolizin-4-one (2r):** The title compound was prepared according to the general procedure and purified by flash column chromatography to give the corresponding product as a yellow solid, 8 mg, 10% yield.  $^1\text{H NMR}$  (400 MHz,  $\text{CDCl}_3$ )  $\delta$  2.29 (s, 3 H), 6.53 (d,  $J = 7.6$  Hz, 1H), 6.84-6.88 (m, 1H), 7.10-7.15 (m, 1H), 7.33 (d,  $J = 8.8$  Hz, 1H), 7.51 (dd,  $J_1 = 1.0$  Hz,  $J_2 = 7.7$  Hz, 1H), 9.00 (d,  $J = 7.6$  Hz, 1H);  $^{13}\text{C NMR}$  (100 MHz,  $\text{CDCl}_3$ )  $\delta$  17.6, 102.7, 114.6, 119.0, 125.3, 126.6, 127.3, 137.0, 140.5, 158.5; **HRMS (ESI)** calcd. for  $\text{C}_{10}\text{H}_{10}\text{NO}$  [ $\text{M}+\text{H}$ ]: 160.0757, found: 160.0985.

## 7. Copies of NMR of starting materials and products

Jan26-2018-OSSO\_cJ.43.fid — XPC-X180126-11-HNMR

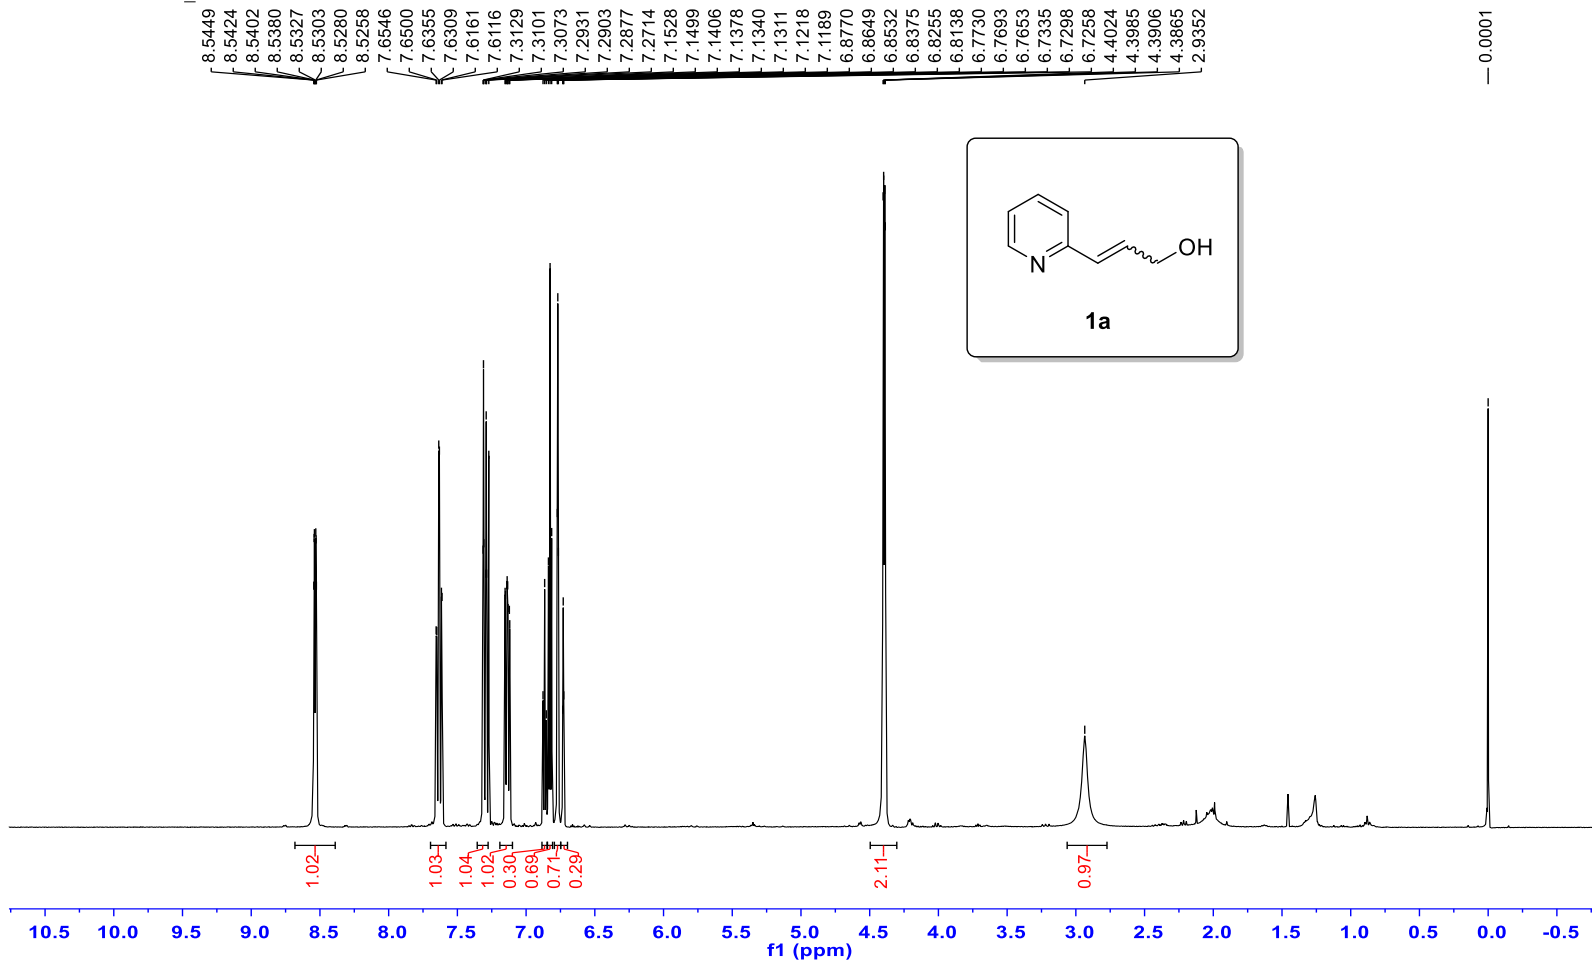



Jan26-2018-OSSO\_cJ.44.fid — XPC-X180126-11-CNMR

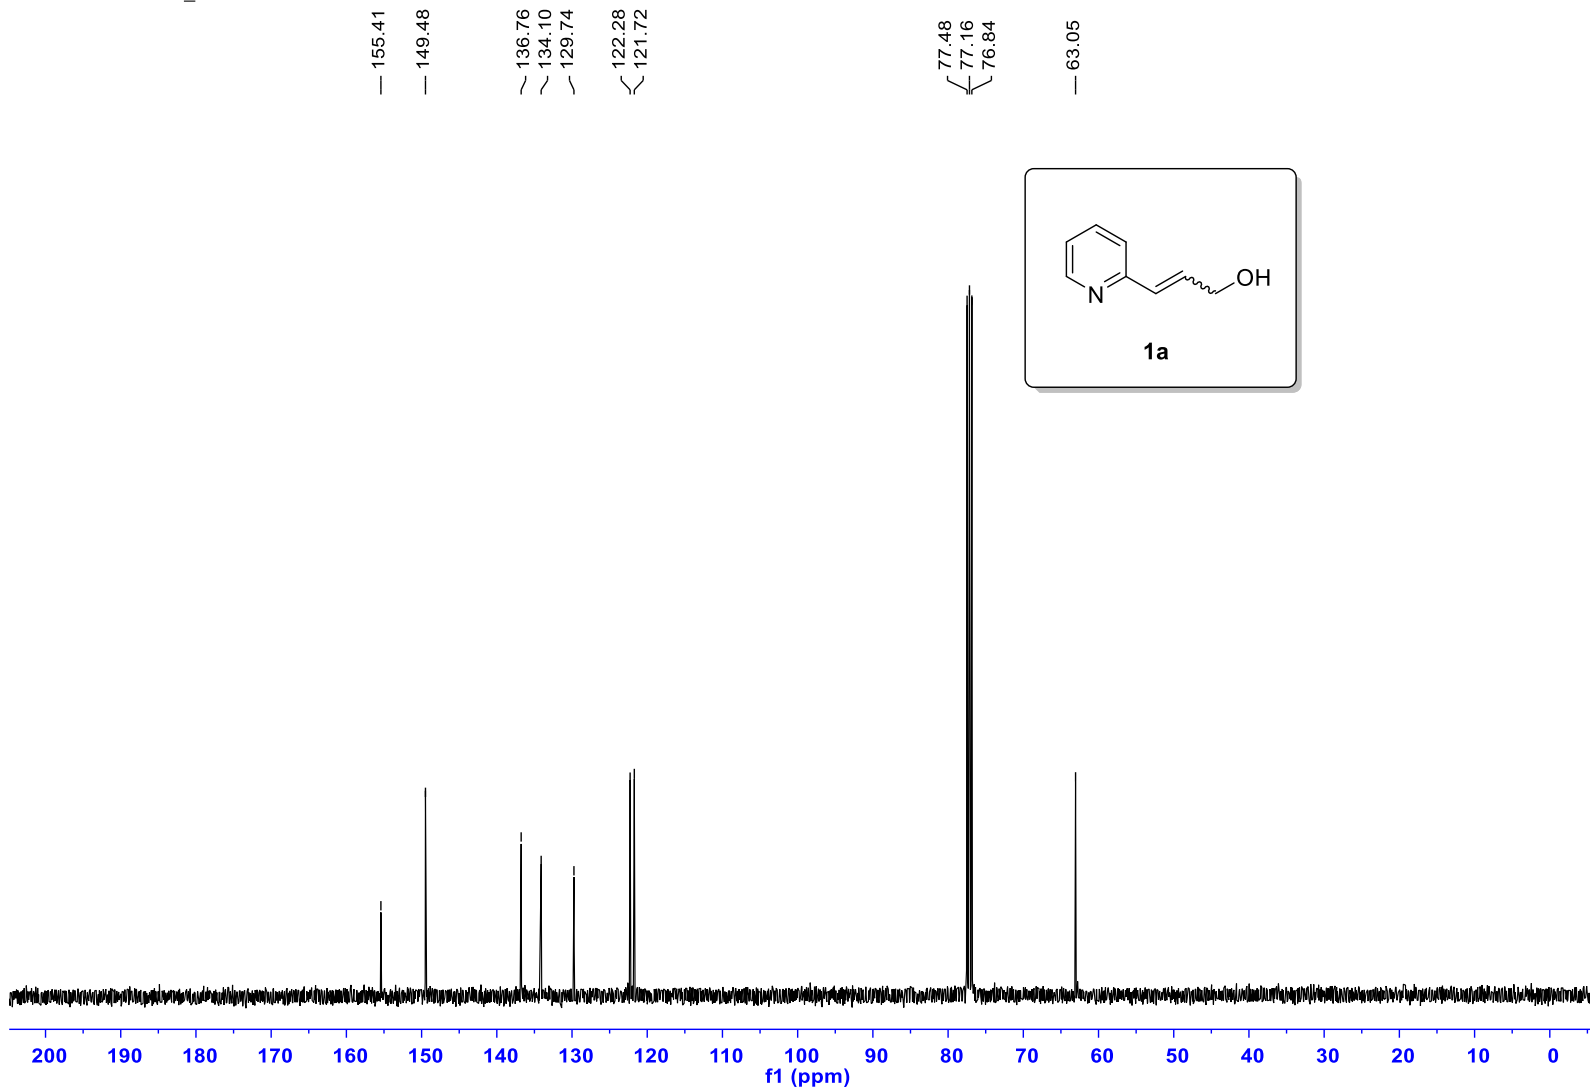

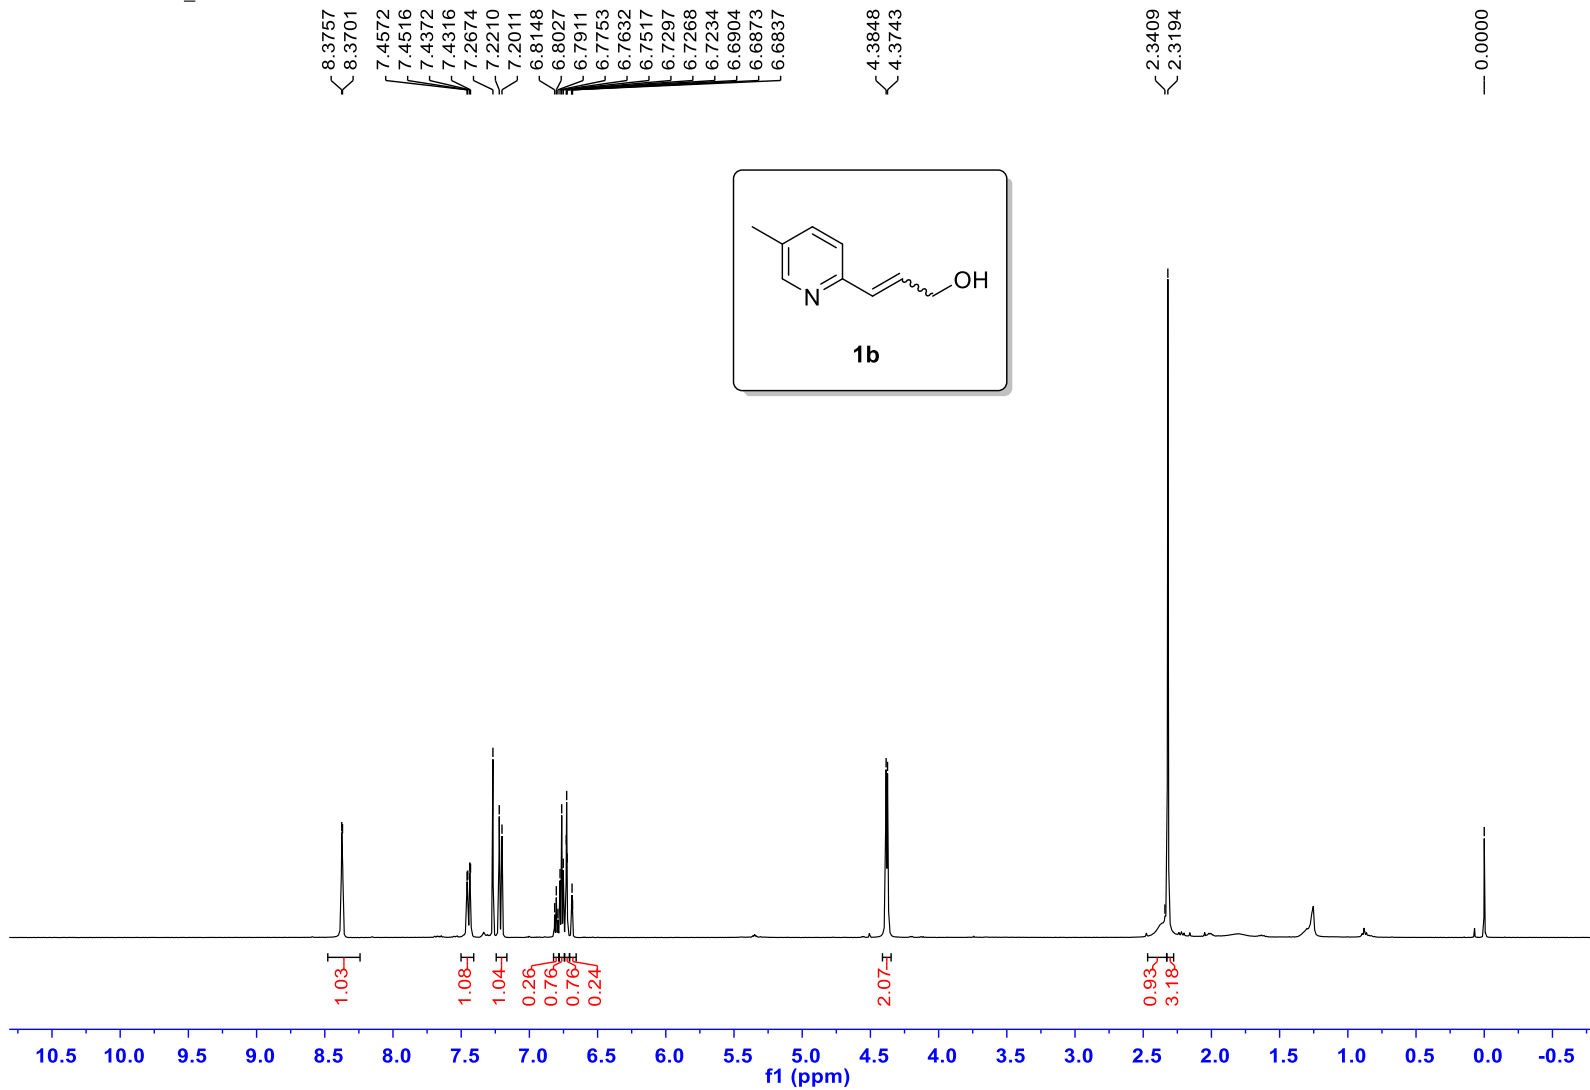

Jan22-2019-OSSO\_cJ.40.fid — XPC-X190122-2CNMR

152.72  
149.98

137.23  
132.66  
131.89  
130.02

121.21

77.47  
77.16  
76.84

63.29

18.38

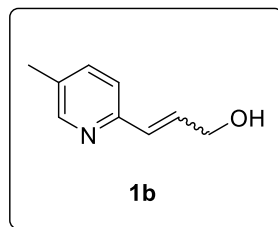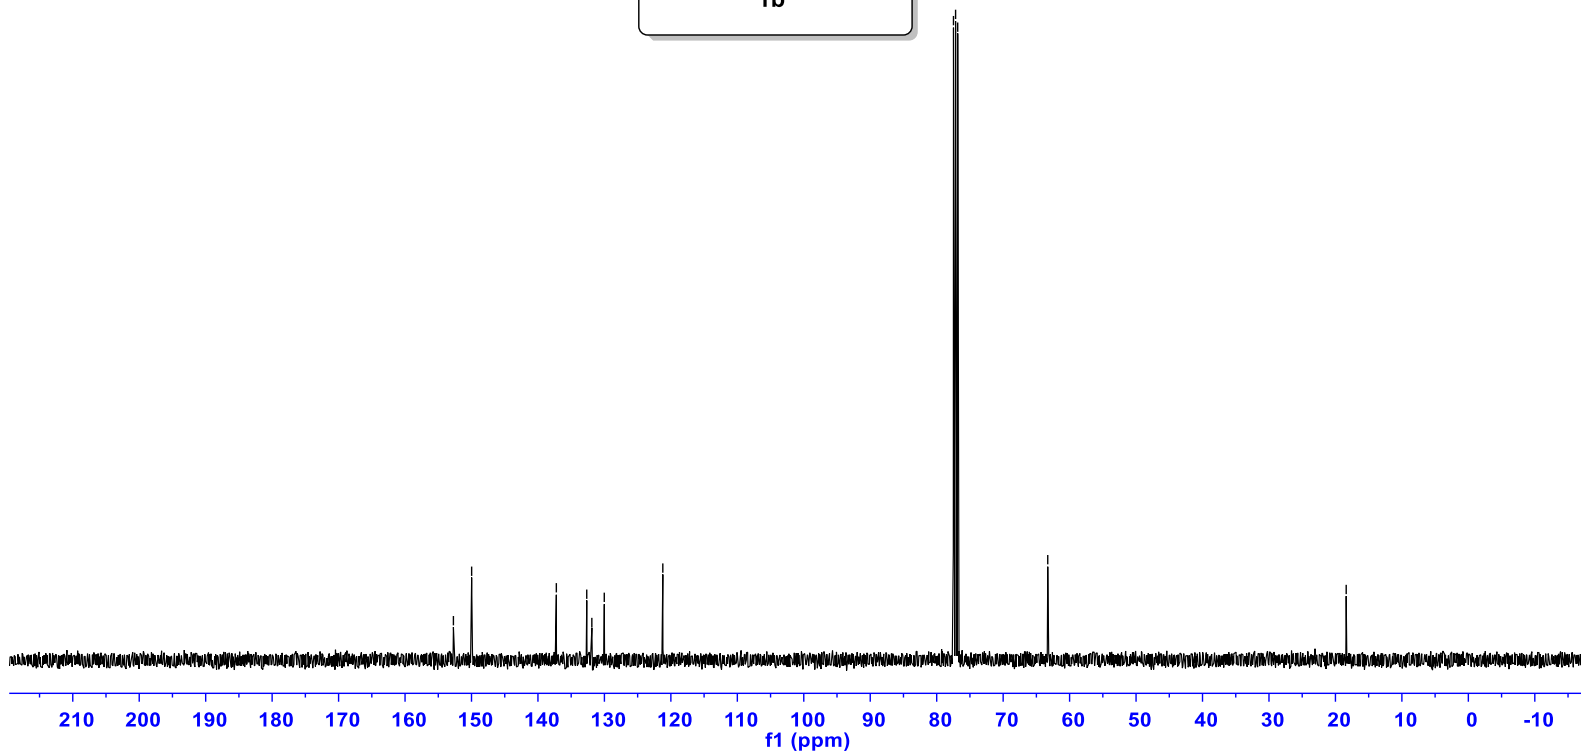

XPC-X191222-4Me-HNMR.10.fid

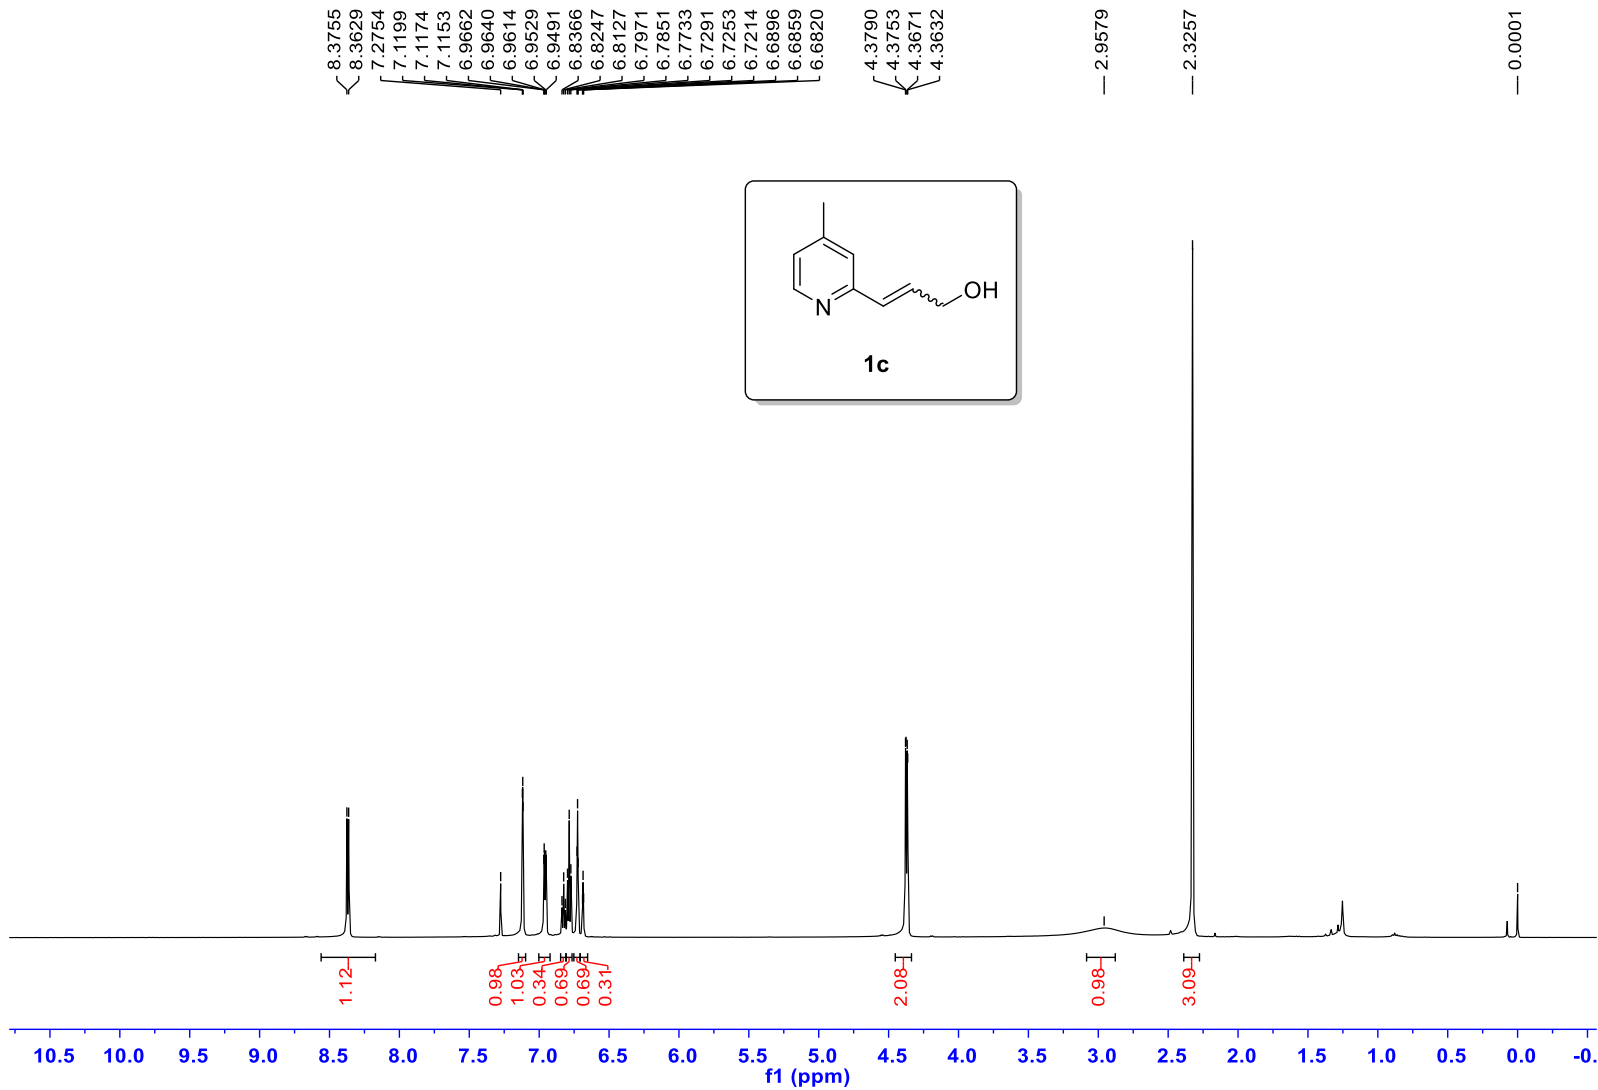

XPC-X191222-4Me-CNMR.11.fid —

— 155.21  
— 149.06  
— 147.92

— 134.10  
— 129.58  
— 123.30  
— 122.58

— 77.48  
— 77.16  
— 76.84

— 62.93

— 21.14

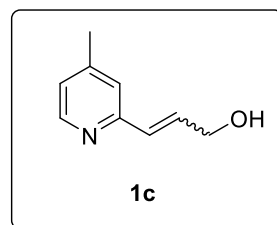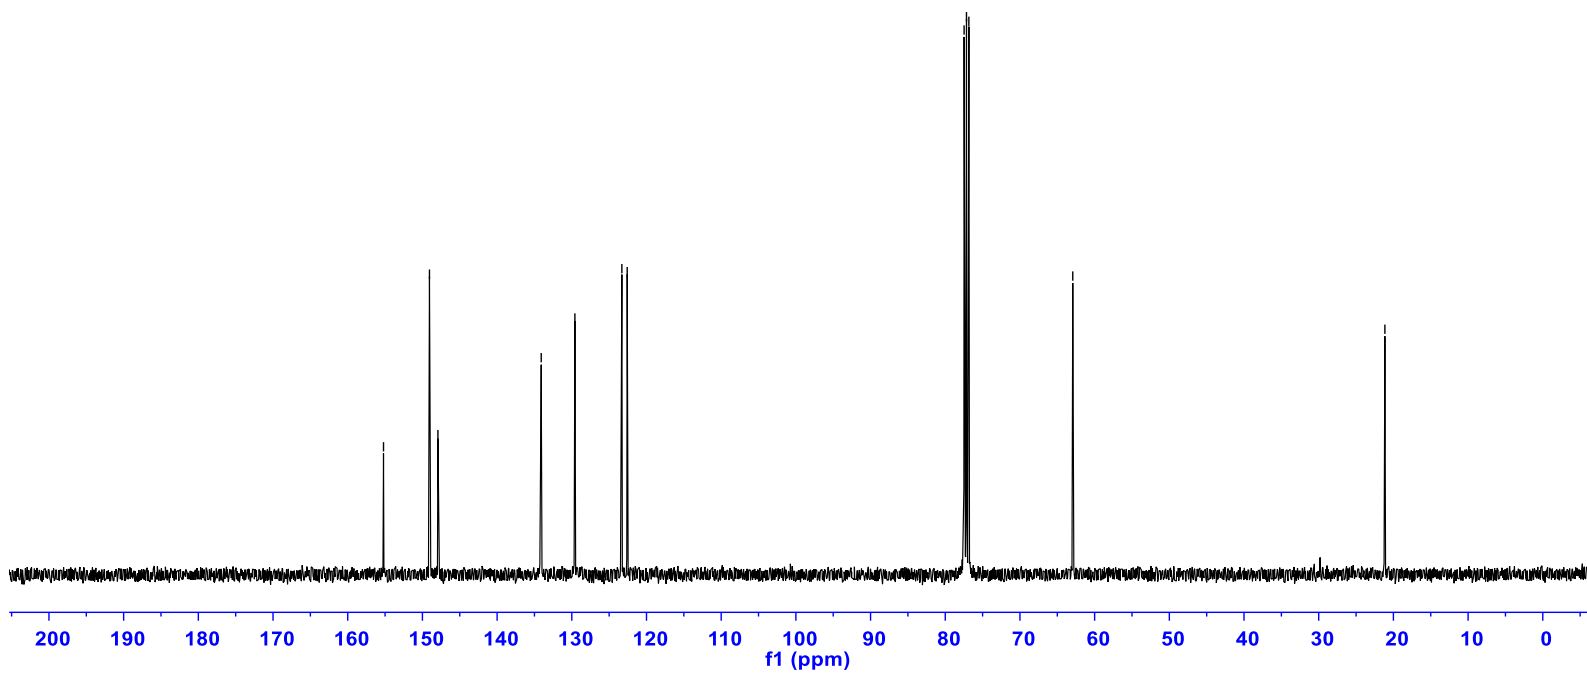

Jan26-2018-OSSO\_cj.37.fid — XPC-X180126-8-HNMR

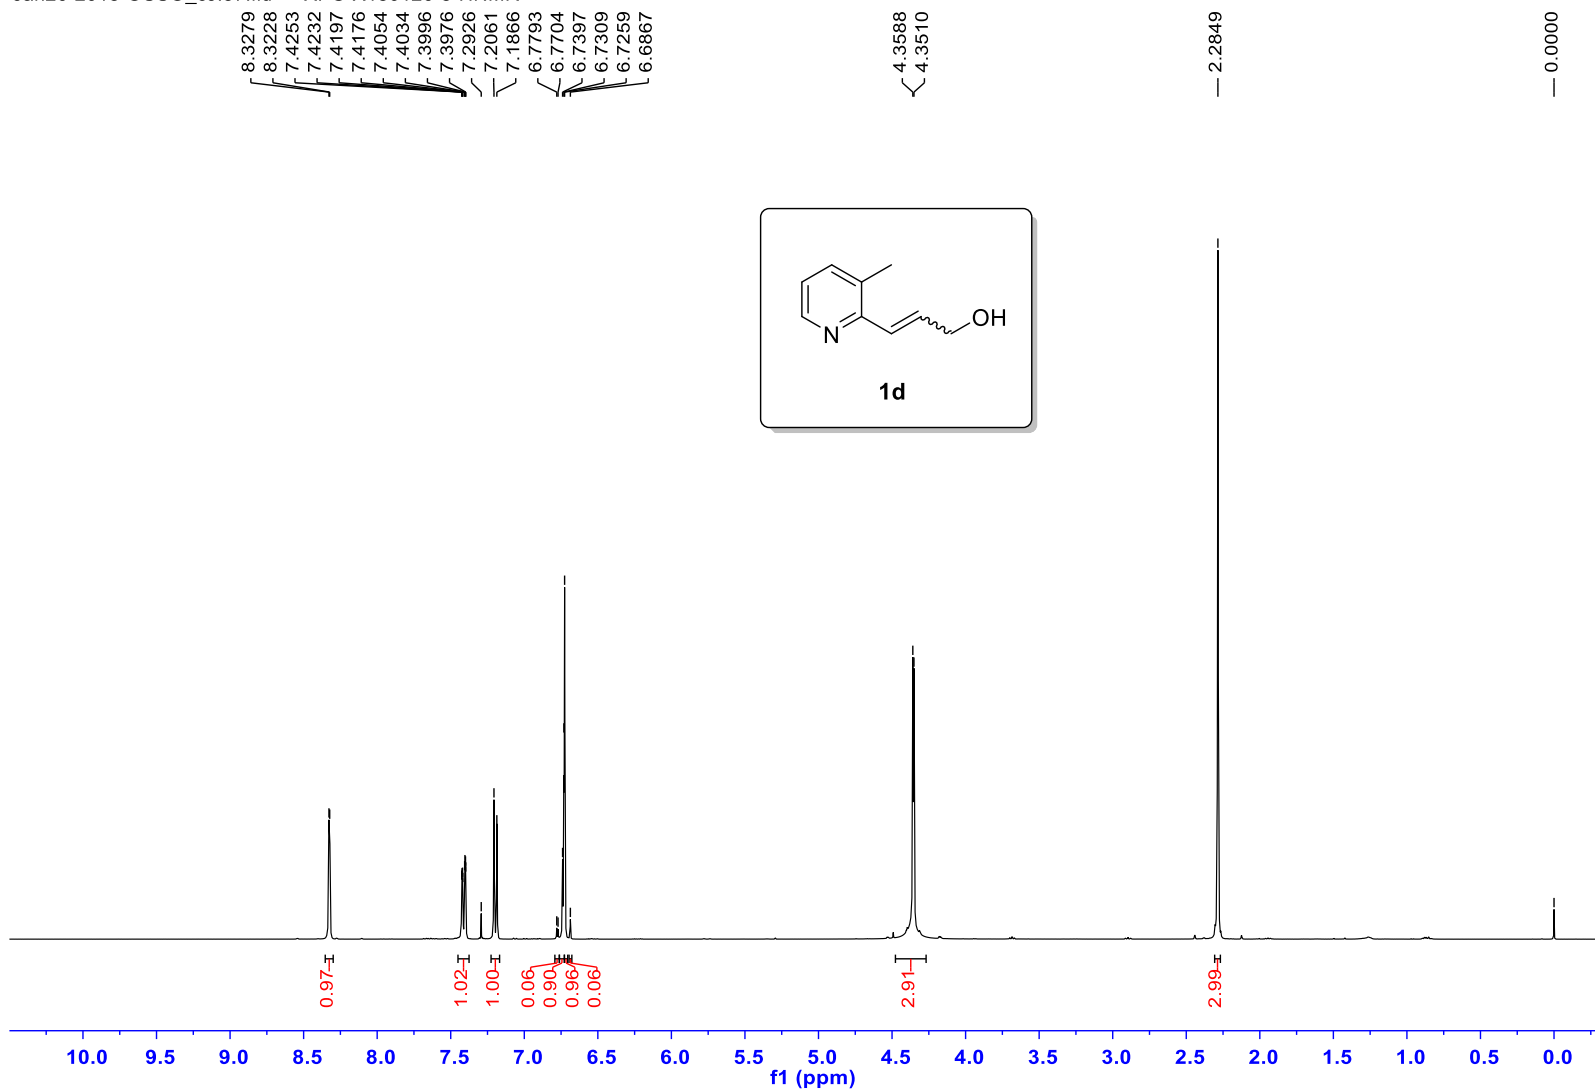

Jan26-2018-OSSO\_cJ.38.fid — XPC-X180126-8-CNMR

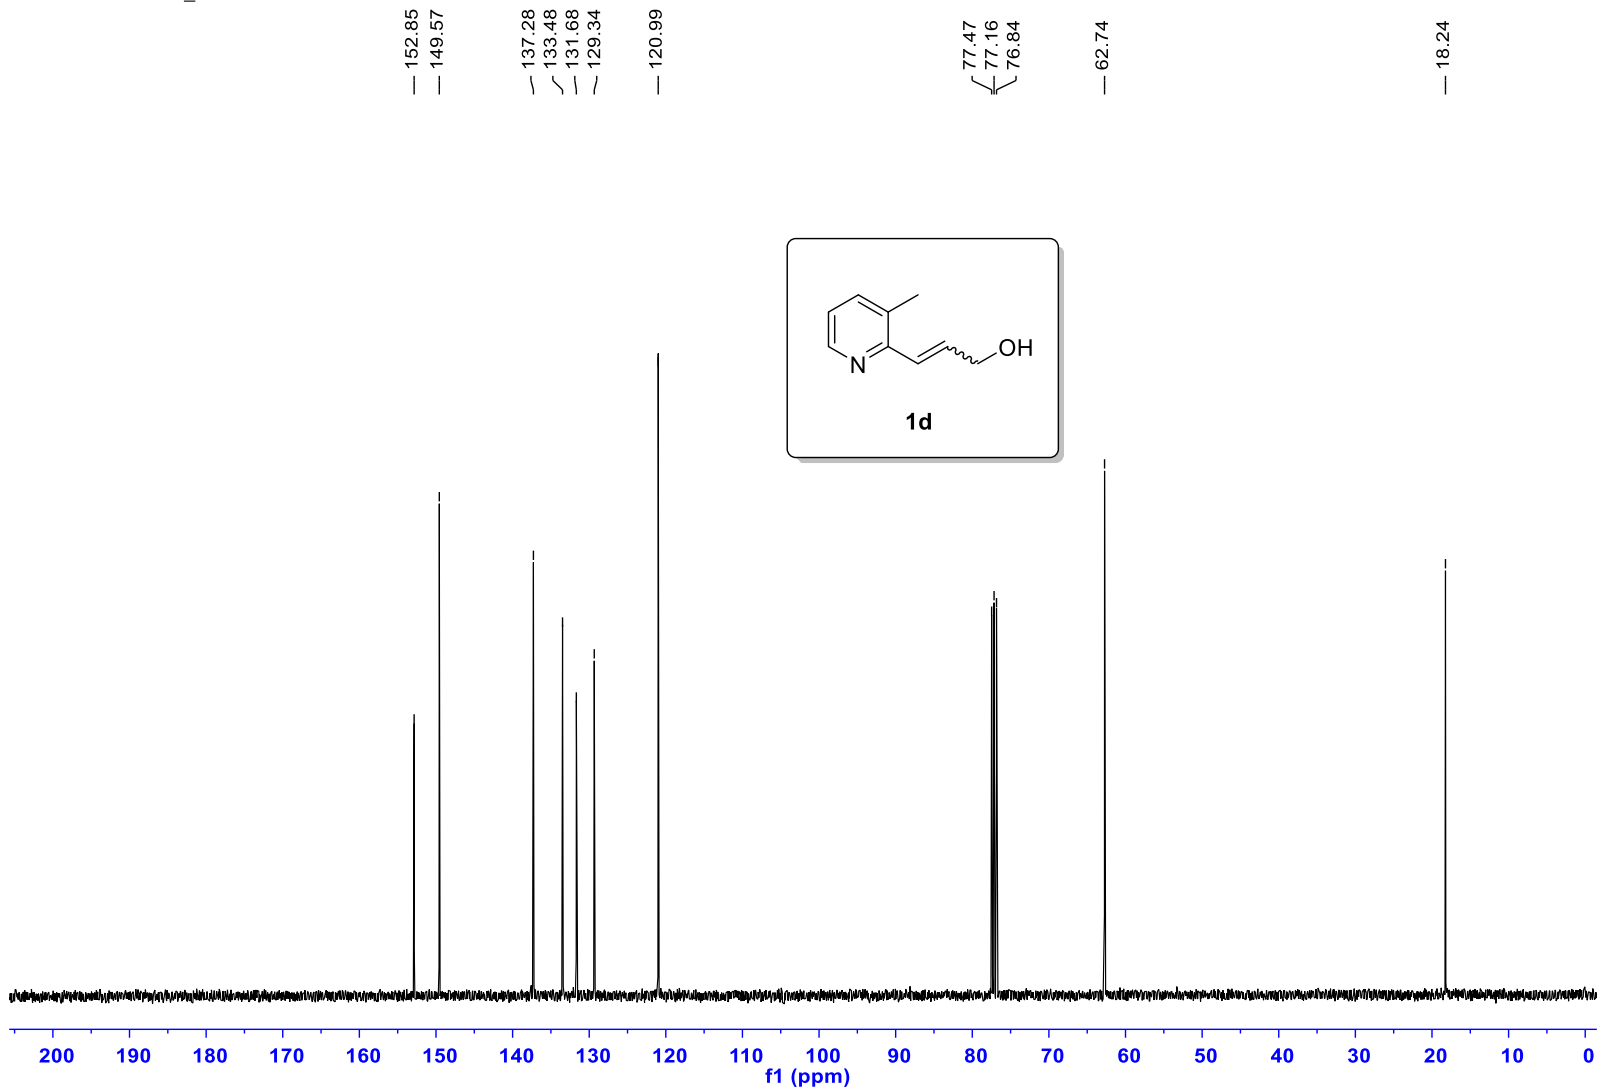

Jan04-2021-OSSO\_cJ.7.fid — XPC-X210104-2

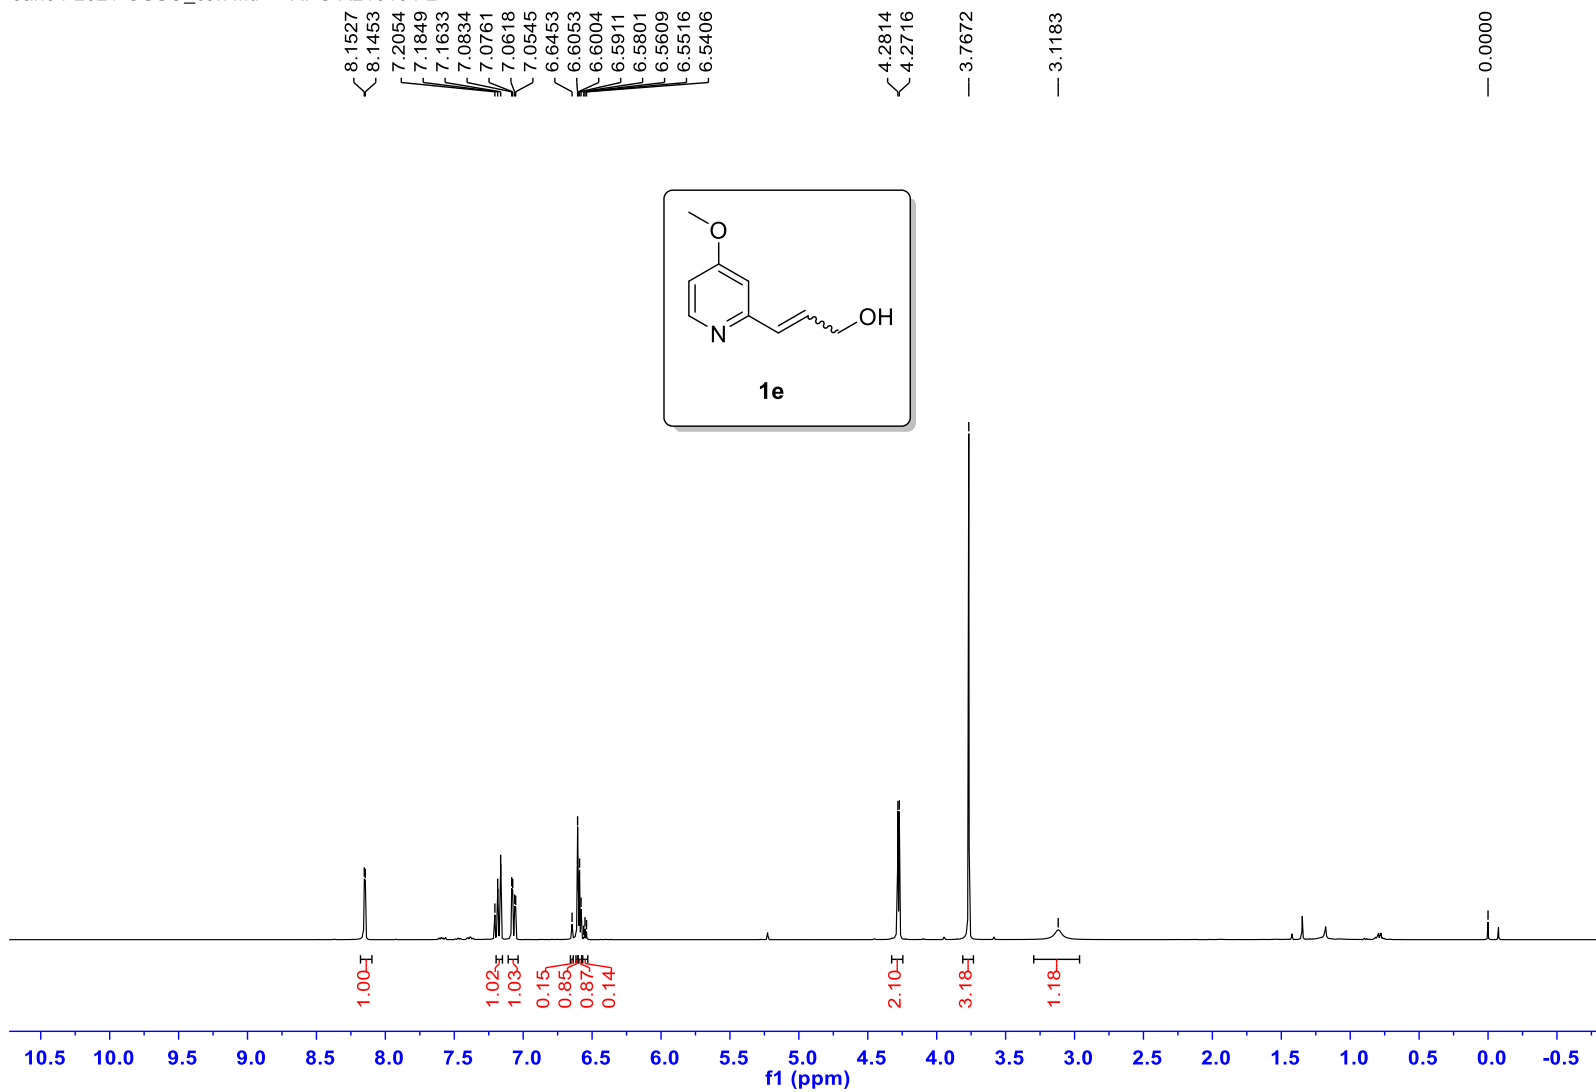



Jan04-2021-OSSO\_cJ.15.fid — XPC-X210104-2-C

— 154.6763

— 148.1466

~ 136.7582

~ 131.6432

~ 129.2532

~ 121.8387

~ 121.1498

— 62.9915

— 55.6443

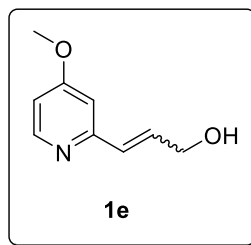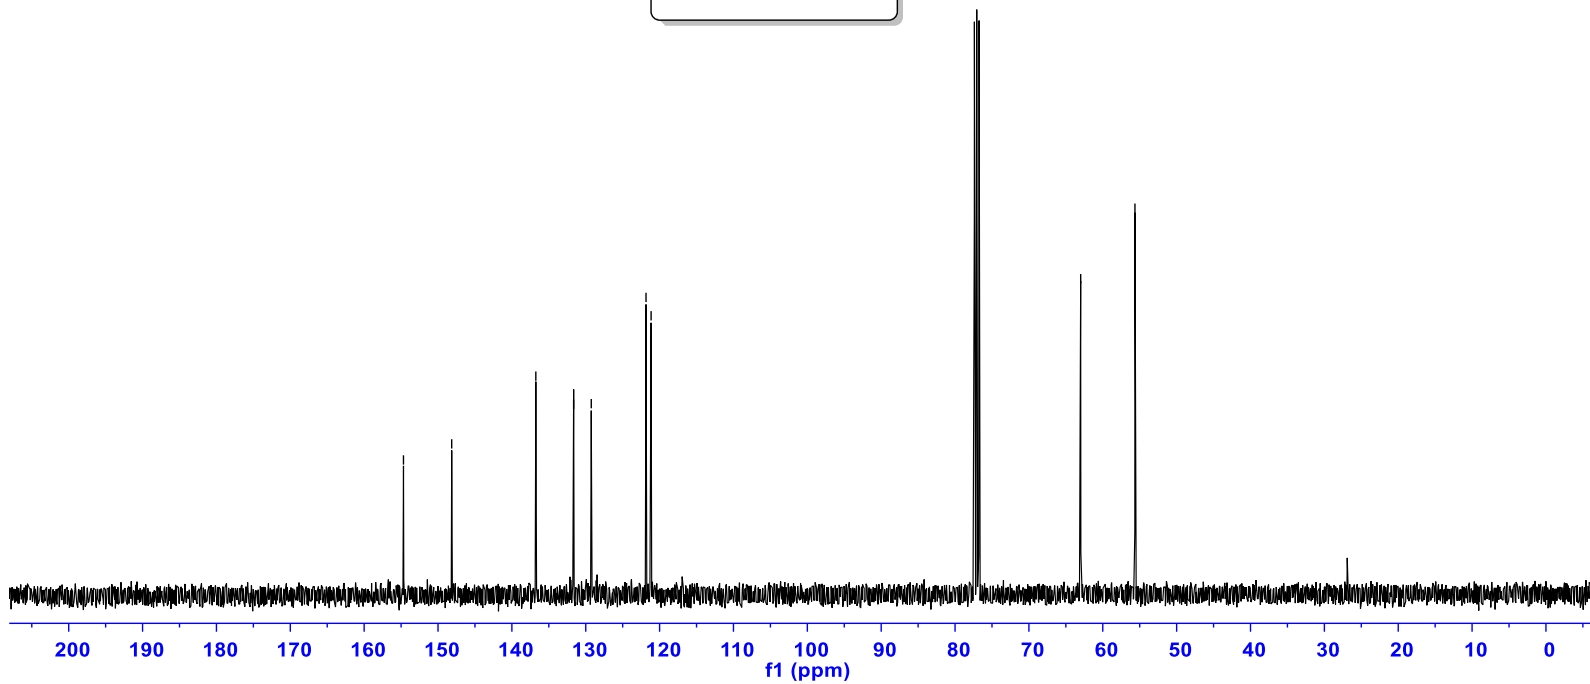

XPC-X191222-6Me-HNMR.10.fid —

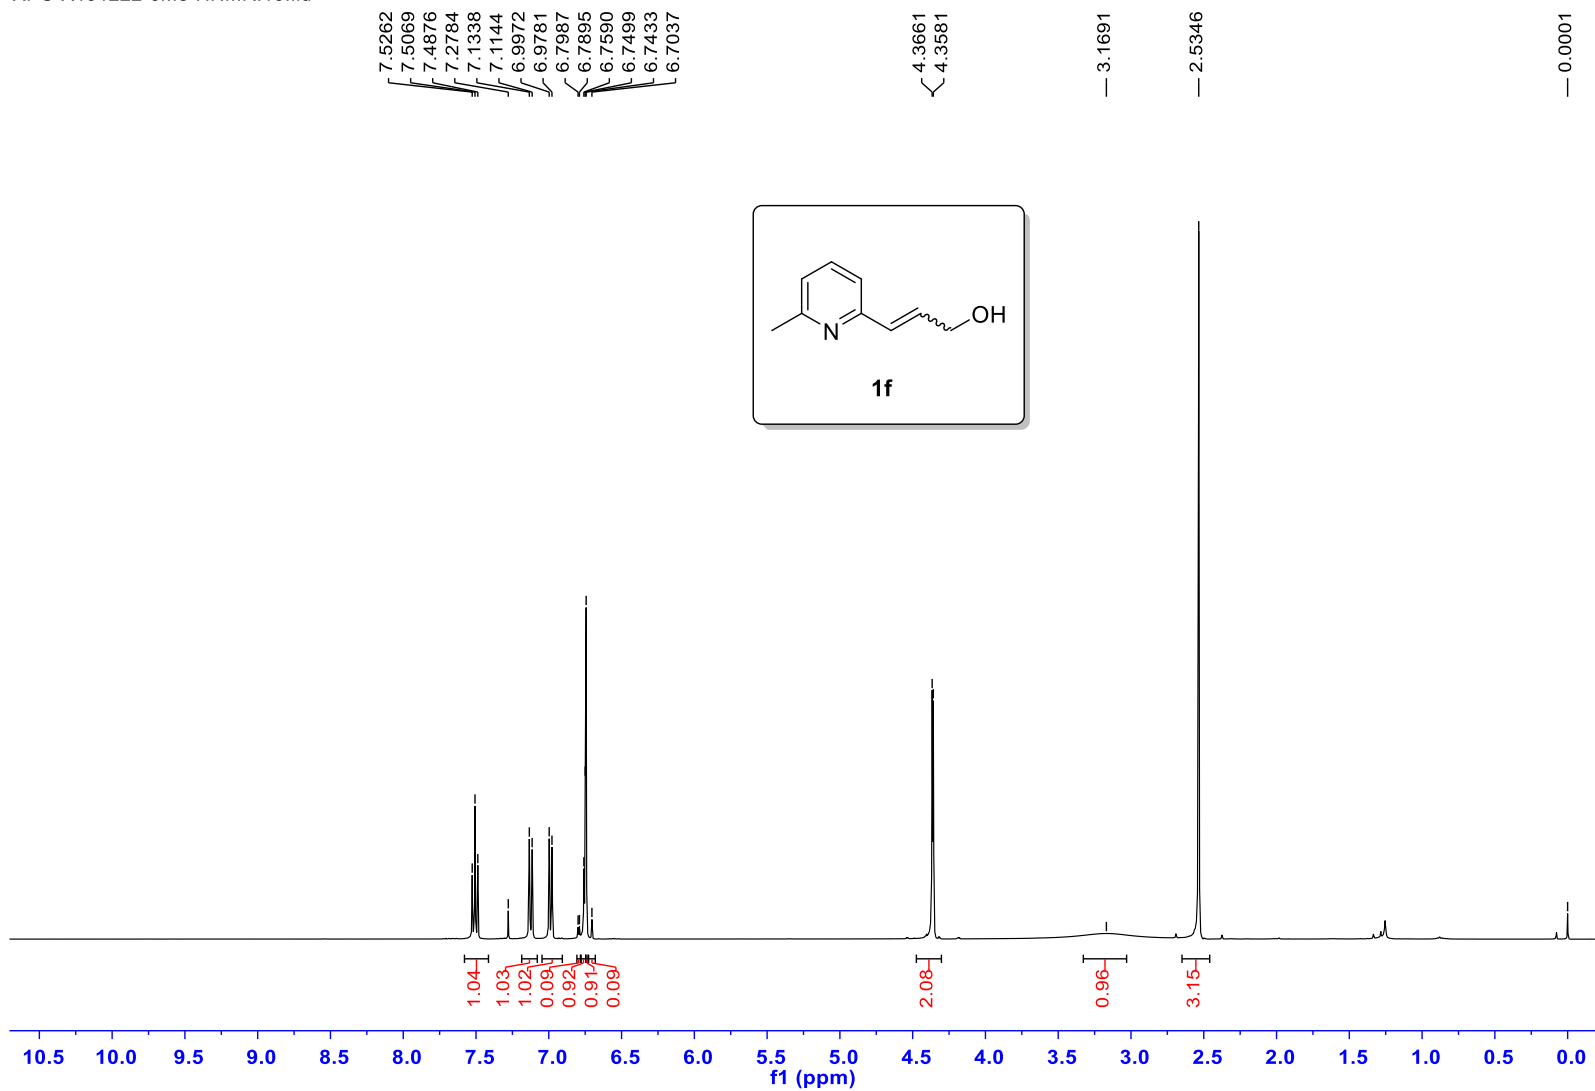

XPC-X191222-6Me-CNMR.11.fid —

— 158.06  
— 154.98

~ 136.95  
~ 134.02  
~ 129.83

— 121.89  
— 118.45

└ 77.48  
└ 77.16  
└ 76.84

— 62.78

— 24.40

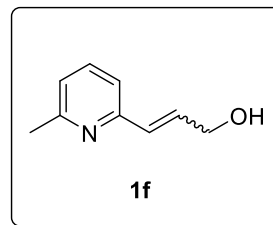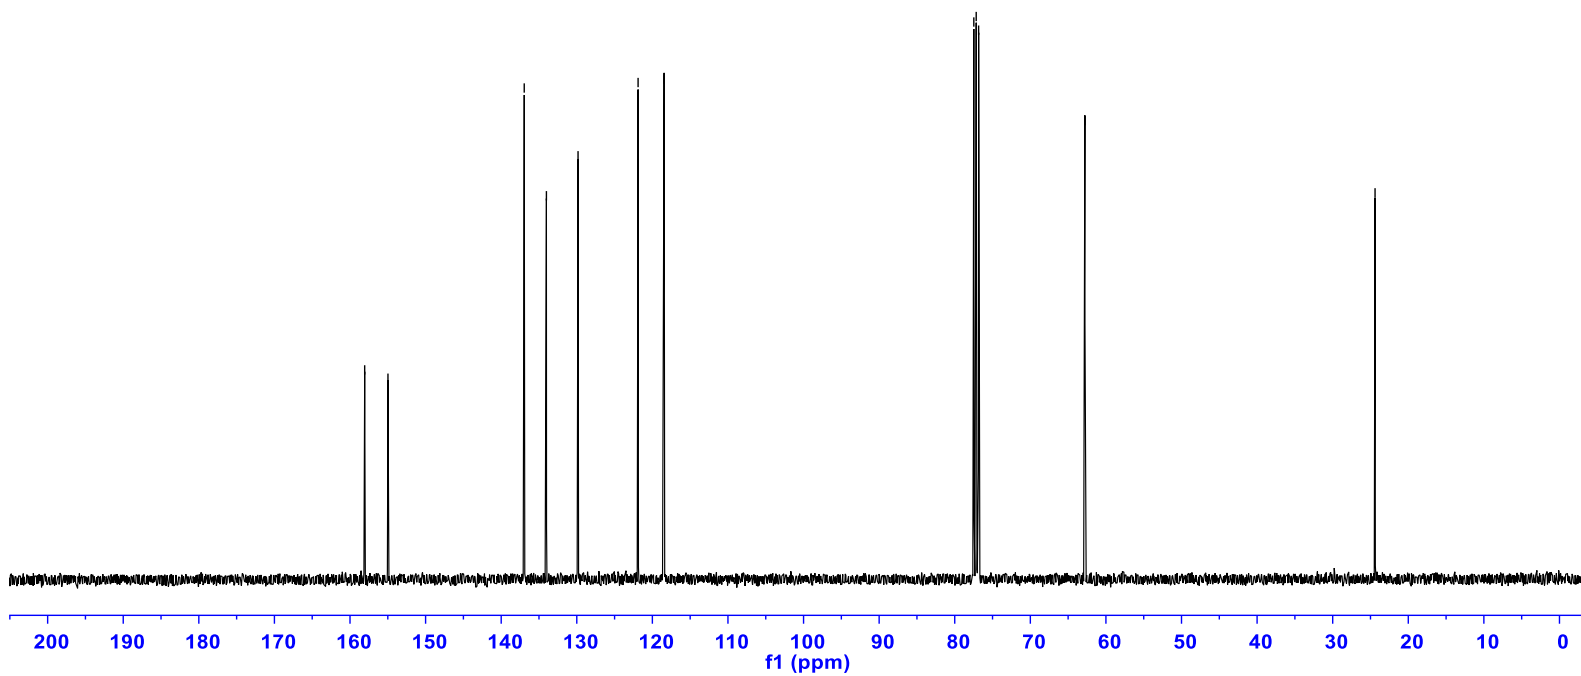

Sep24-2020-OSSO\_cj.8.fid — XPC-X200924-5

7.6139  
7.5947  
7.5754  
7.2793  
7.1594  
7.1401  
7.1062  
7.0870  
6.8573  
6.8448  
6.8326  
6.8177  
6.8054  
6.7932  
6.7059  
6.7017  
6.6973  
6.6665  
6.6622  
6.6580

4.7119  
4.3542  
4.3500  
4.3418  
4.3376

3.4511

-0.0000

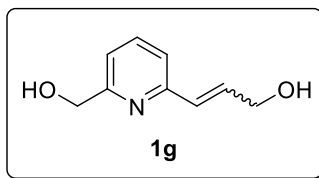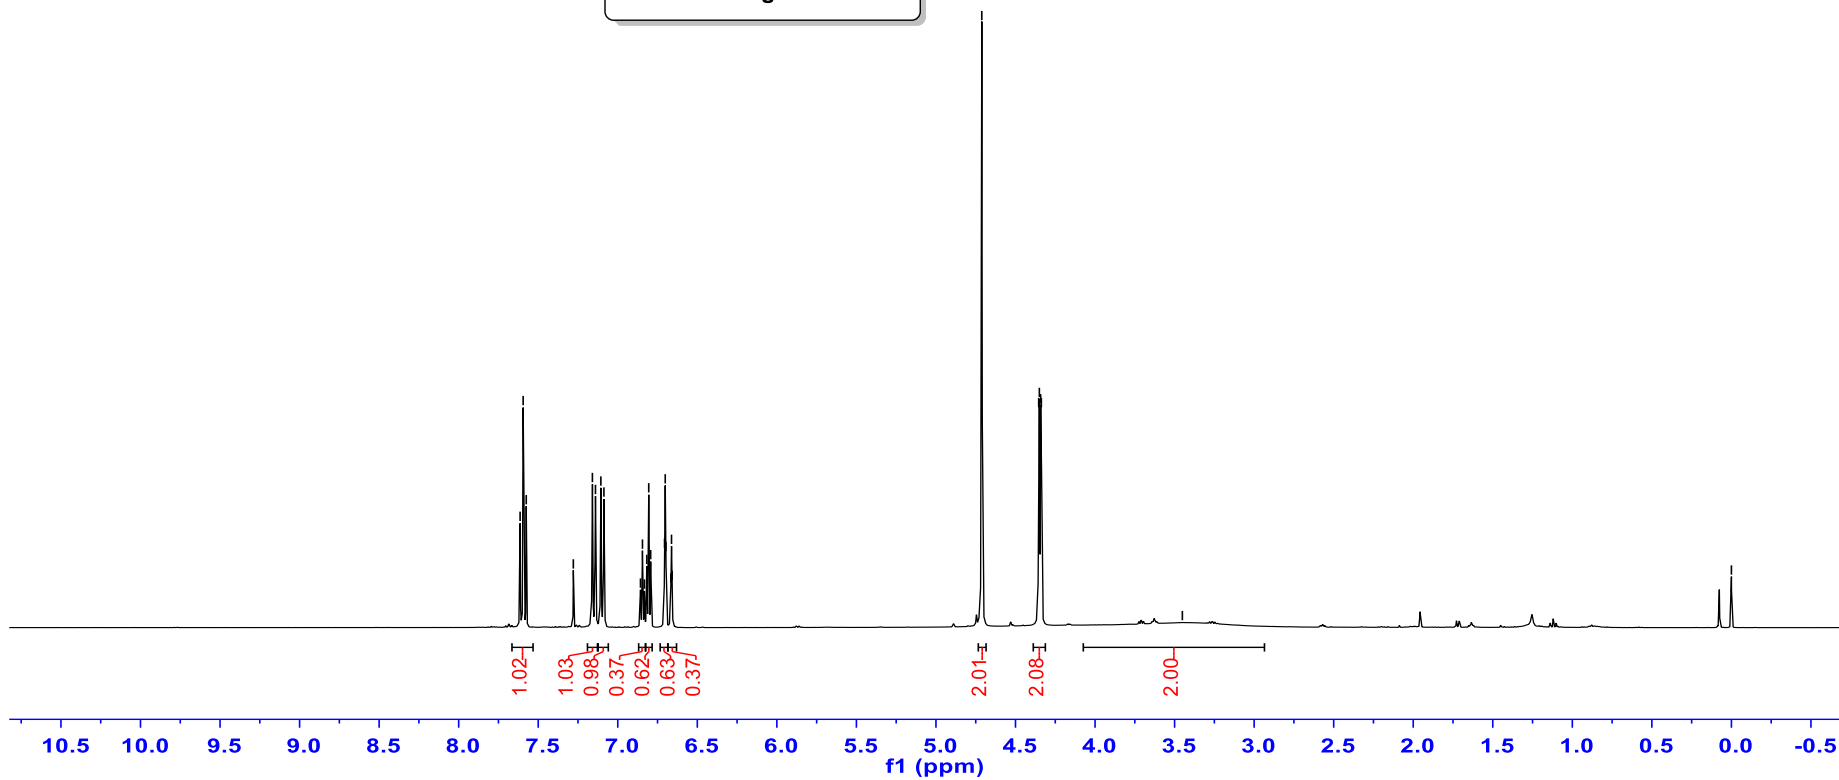

Sep24-2020-OSSO\_cj.9.fid — XPC-X200924-5-C

158.70  
154.16

137.44  
134.24  
129.11

120.29  
119.15

77.47  
77.16  
76.84

64.05  
62.81

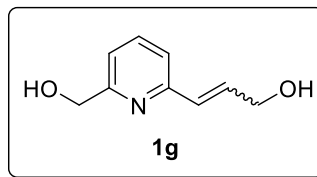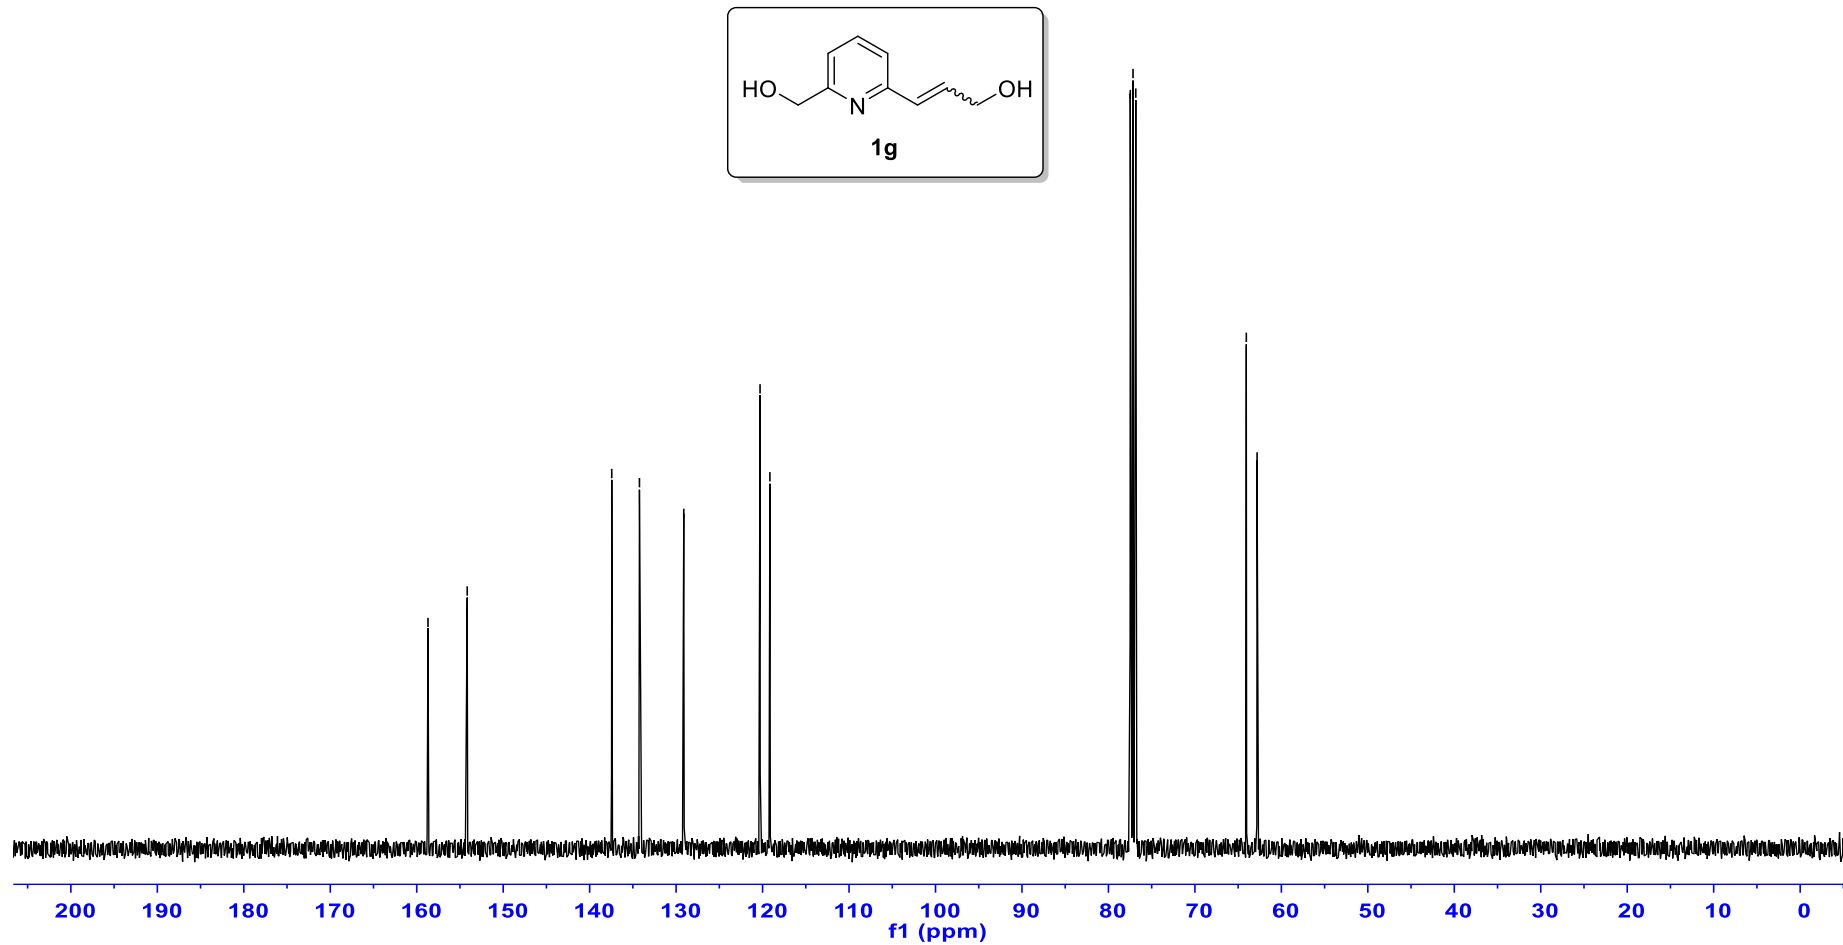

Nov19-2020-OSSO\_cj.19.fid — XPC-X201119-3

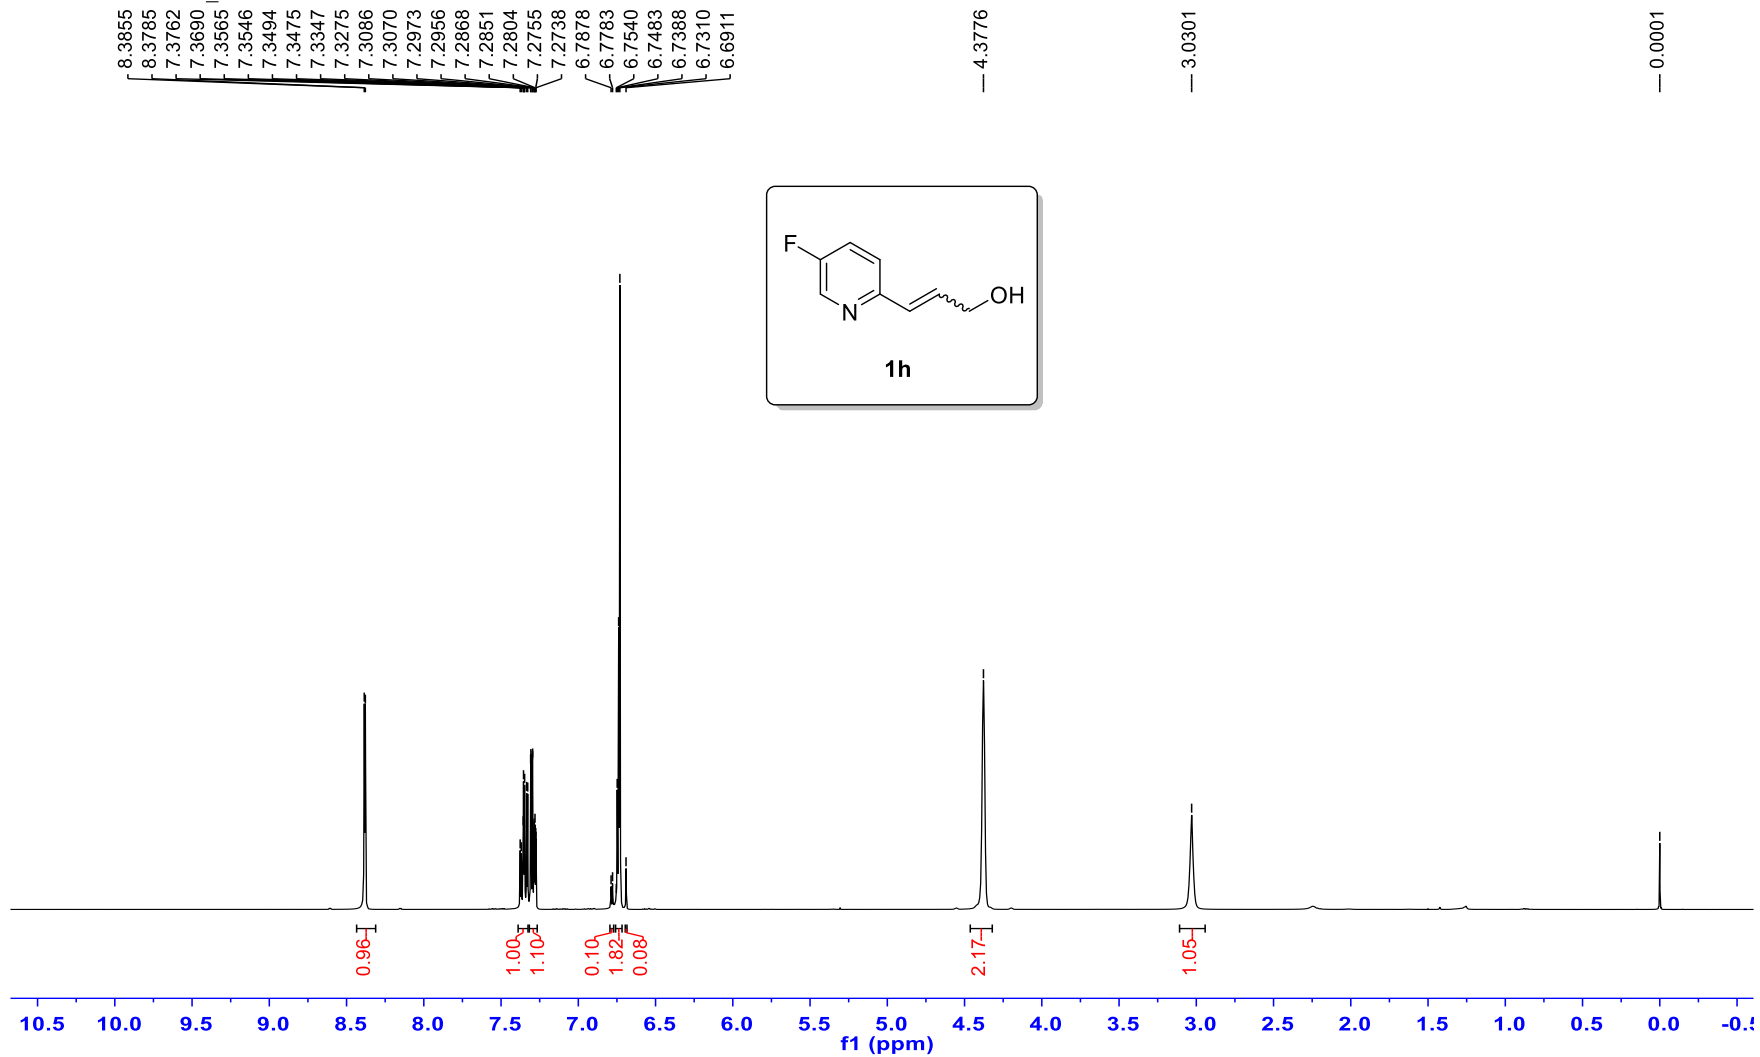

Jan26-2018-OSSO\_cJ.32.fid — XPC-X180126-6-HNMR

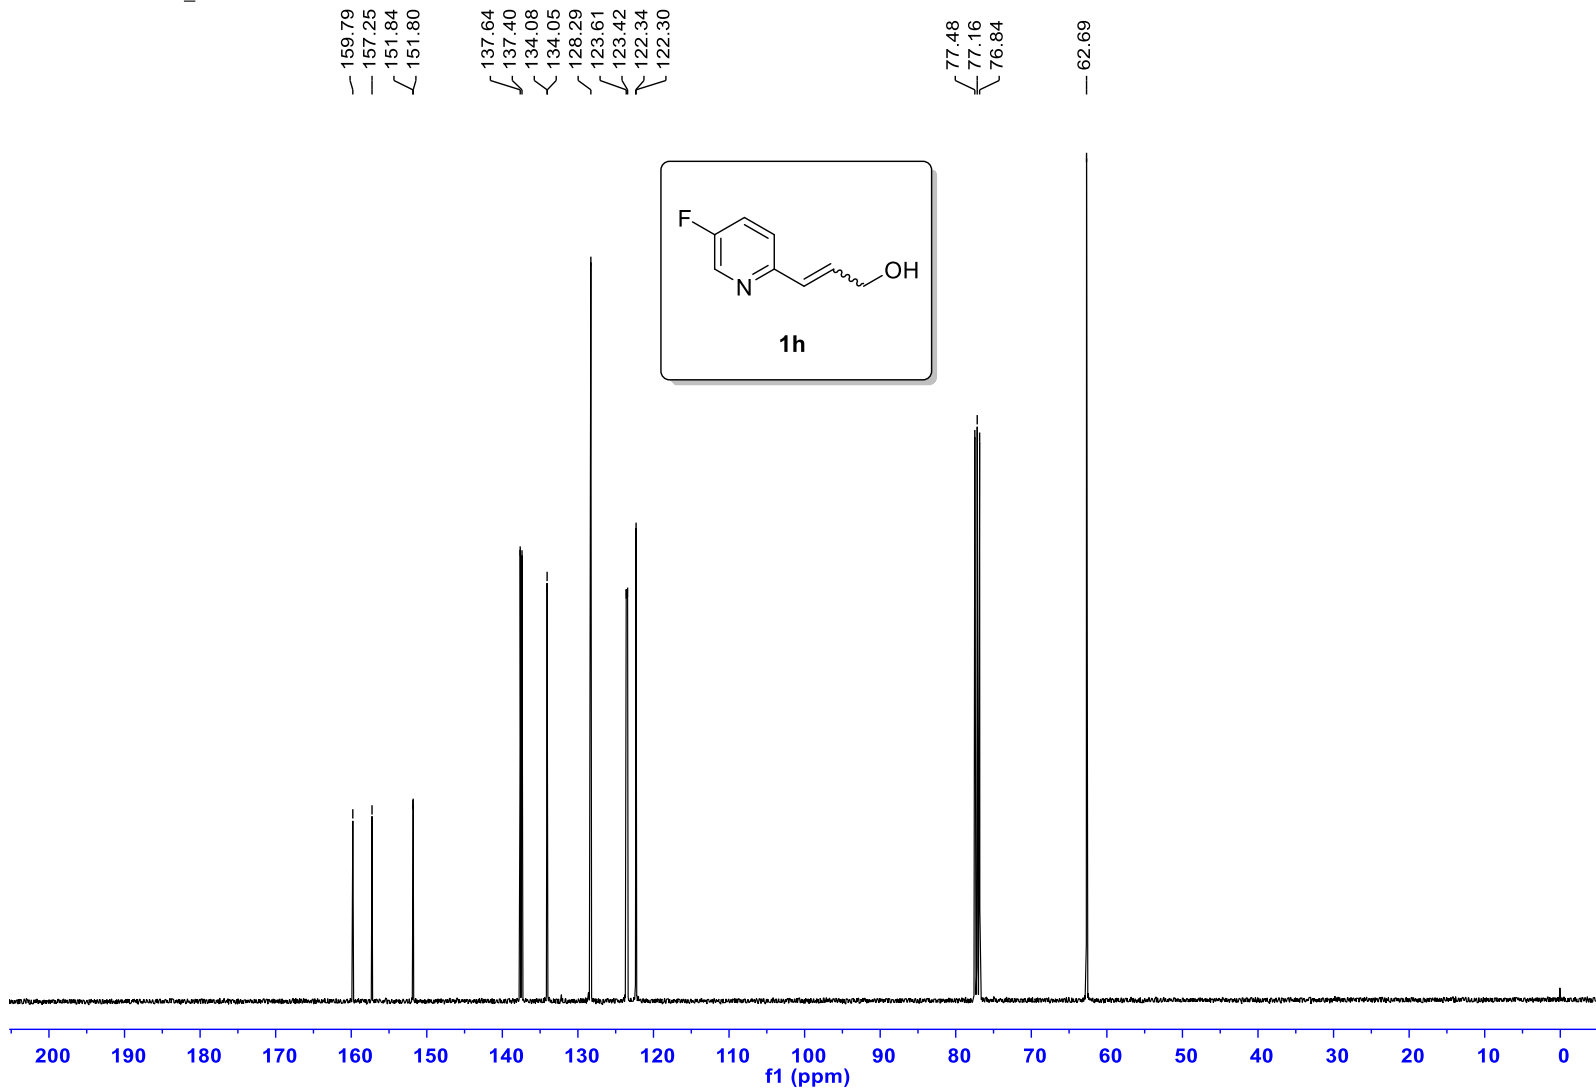

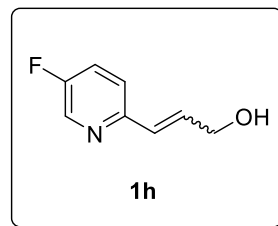

— -128.78

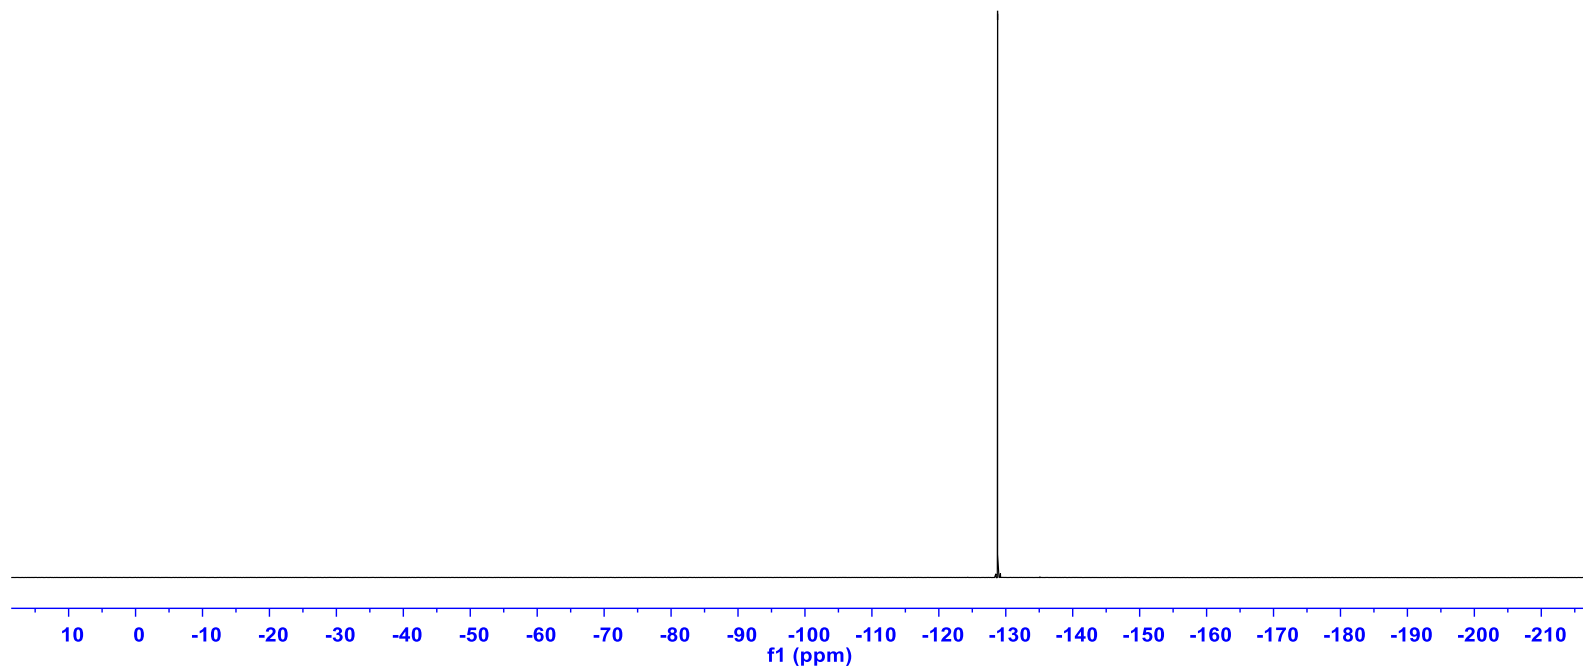



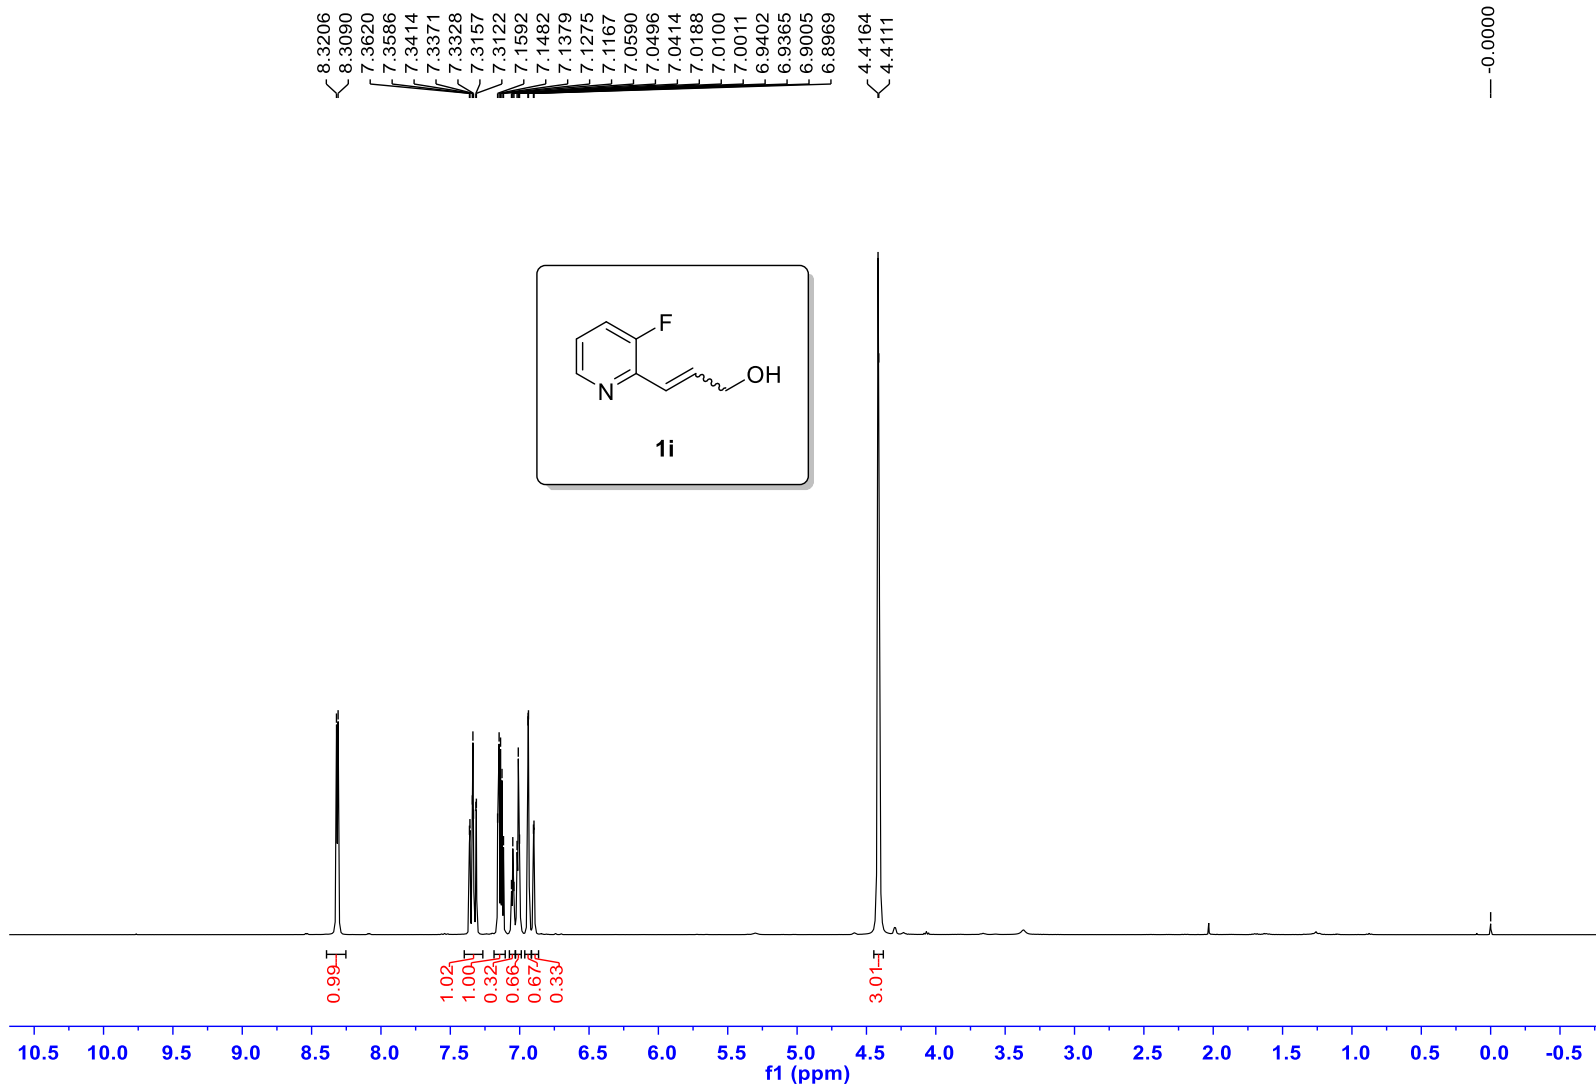

Nov21-2017-OSSO-CJ.3.fid — XPC-X171121-1-CNMR

158.12  
155.53  
144.89  
144.83  
143.86  
143.74  
136.81  
136.76

123.51  
123.32  
123.15  
123.11  
121.30

77.47  
77.16  
76.84

62.67

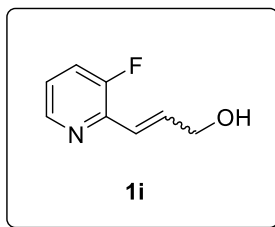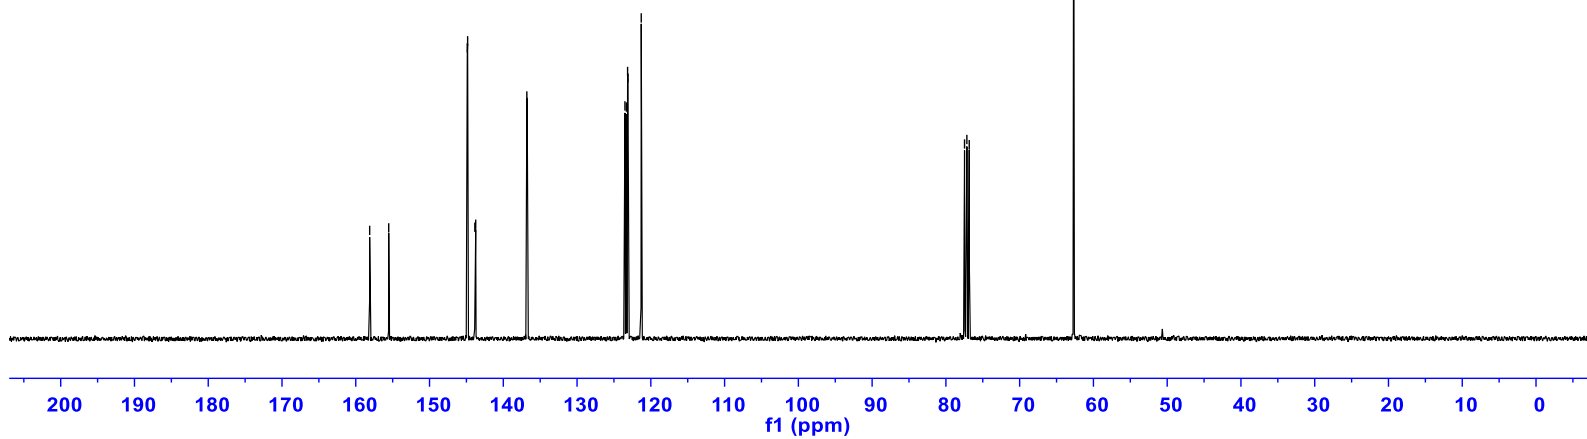

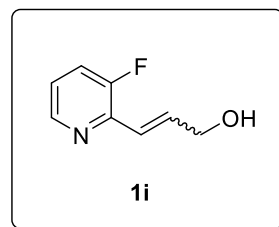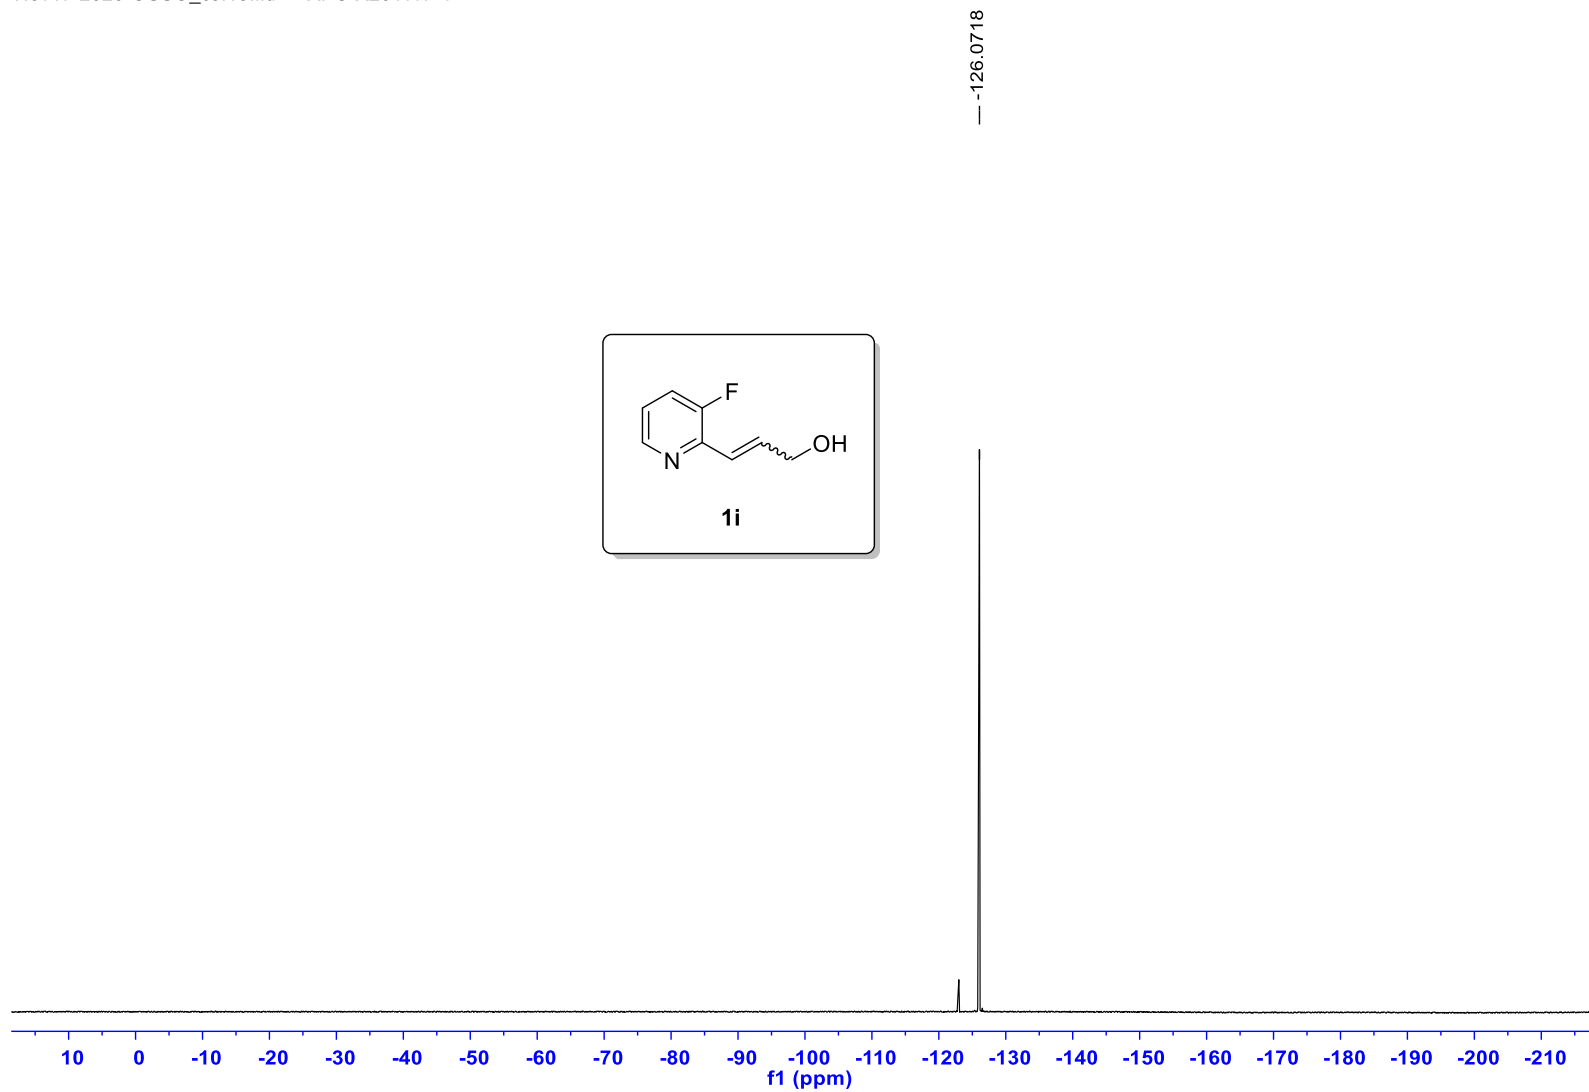

Sep24-2020-OSSO\_cj.7.fid — XPC-X200924-4

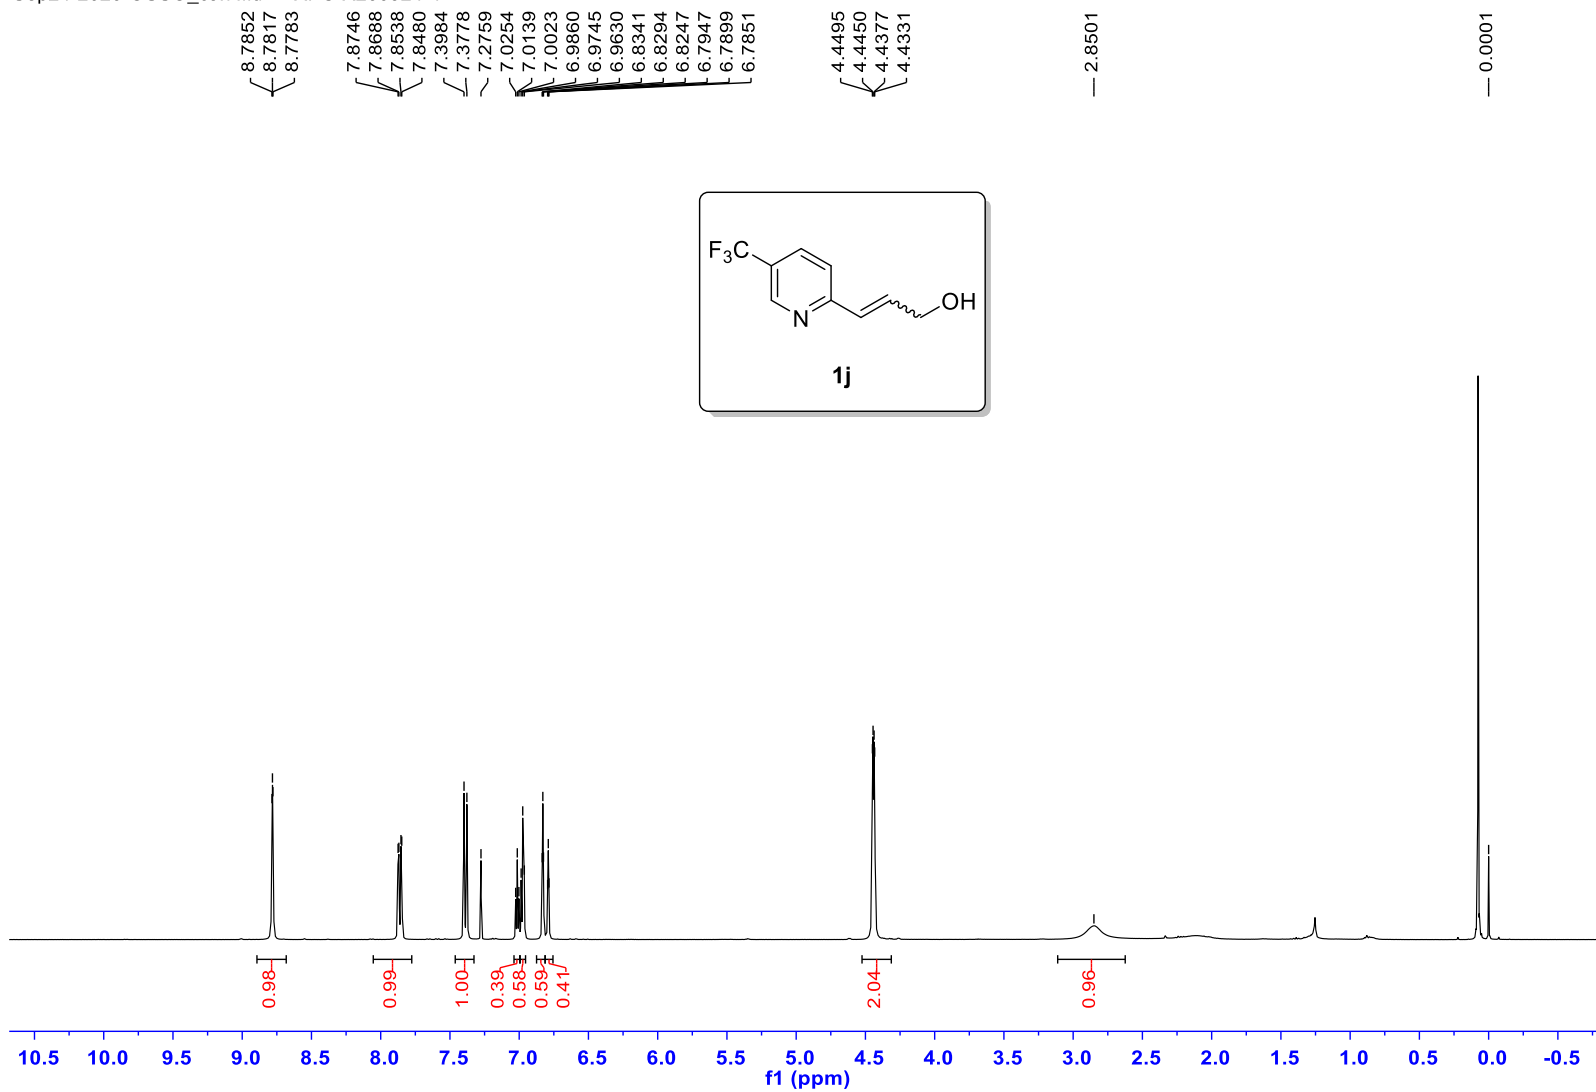

XPC-X191230-S-CF3-CNMR.11.fid —

158.65  
158.63  
146.47  
146.43  
146.38  
146.34  
137.28  
134.02  
133.99  
133.95  
133.91  
128.06  
125.32  
125.02  
124.66  
124.33  
122.31  
121.20

— 62.69

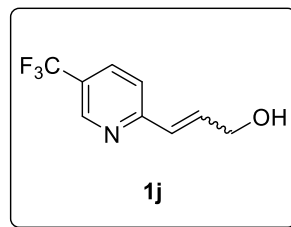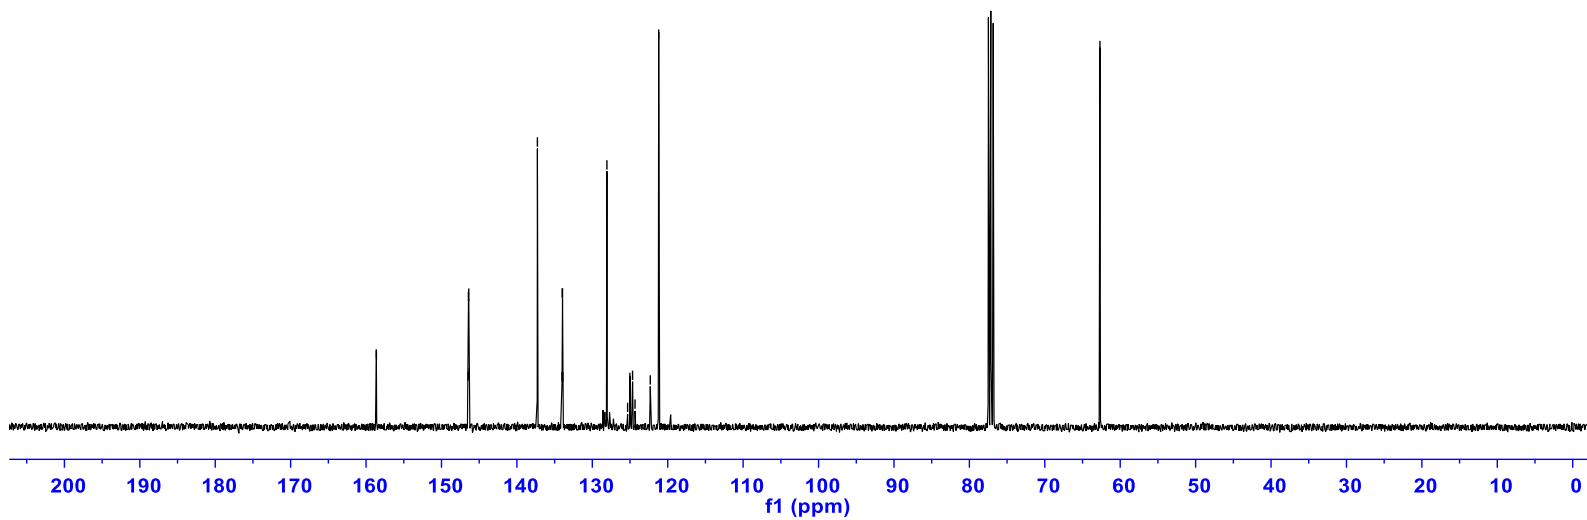

— 62.32

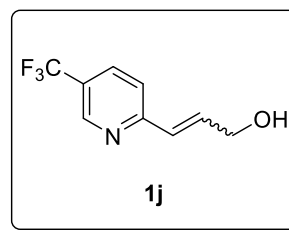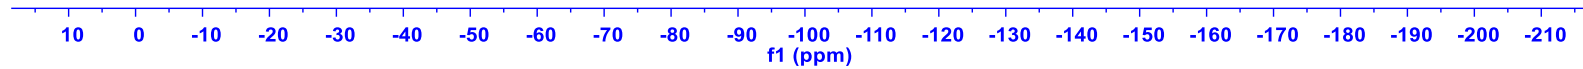

Jan26-2018-OSSO\_cJ.41.fid — XPC-X180126-10-HNMR

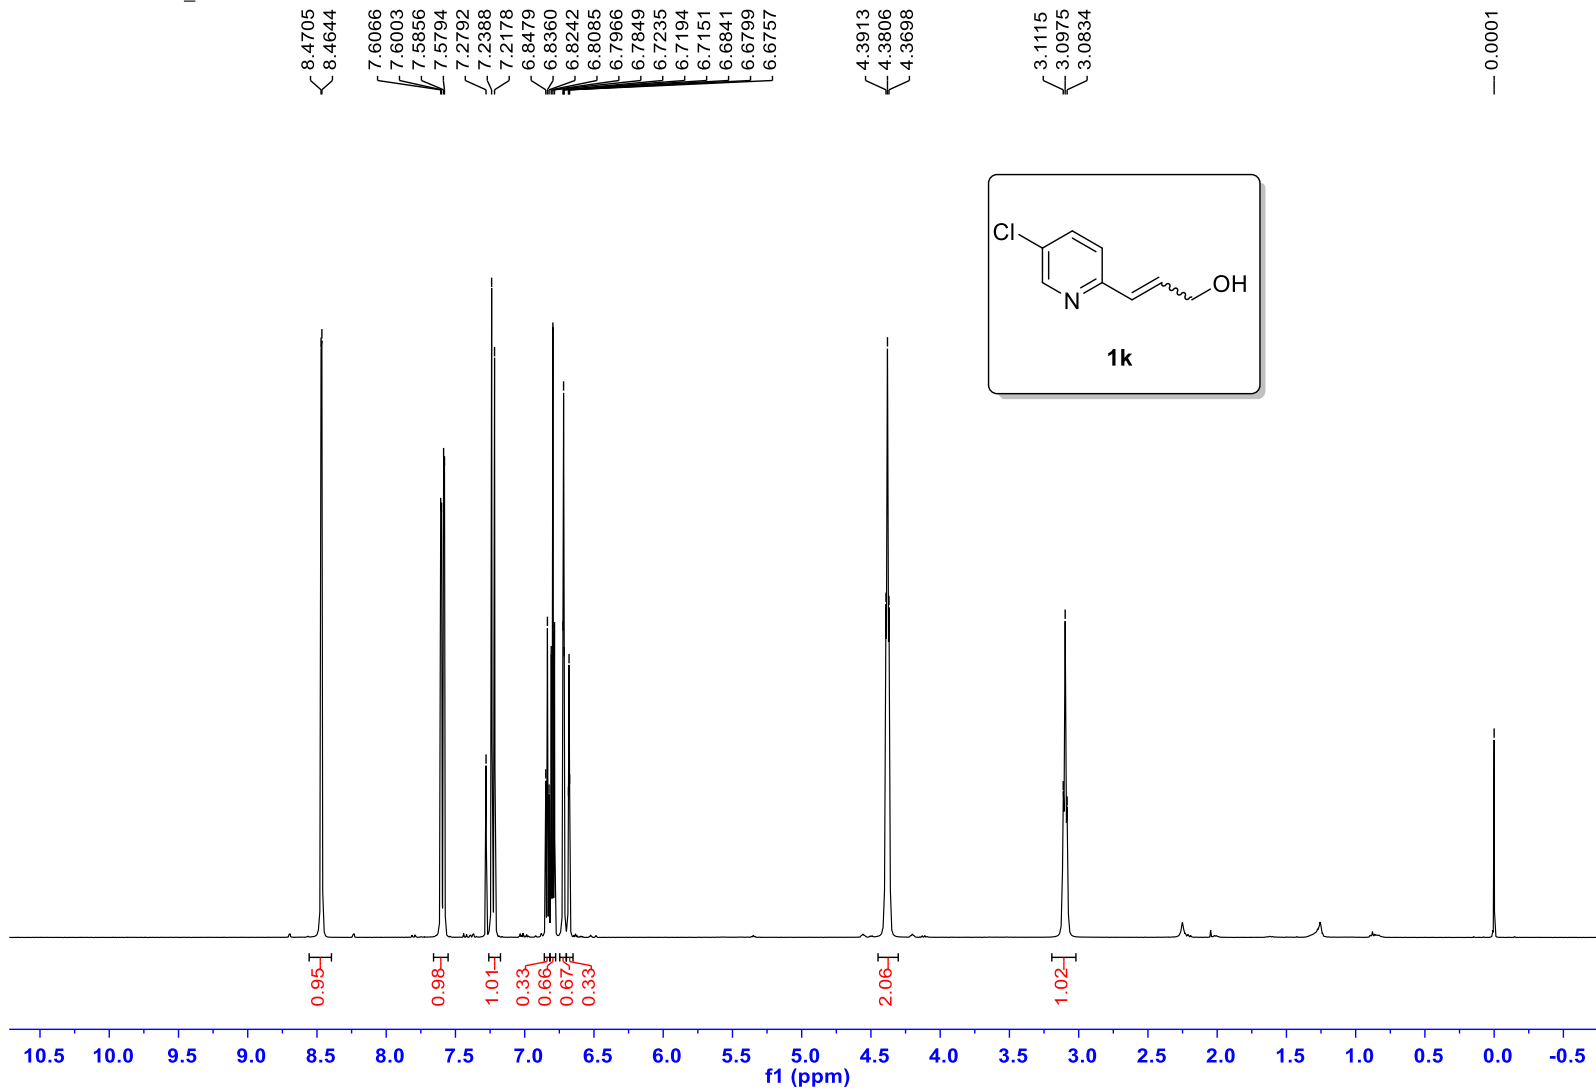

Jan26-2018-OSSO\_cJ.42.fid — XPC-X180126-10-CNMR

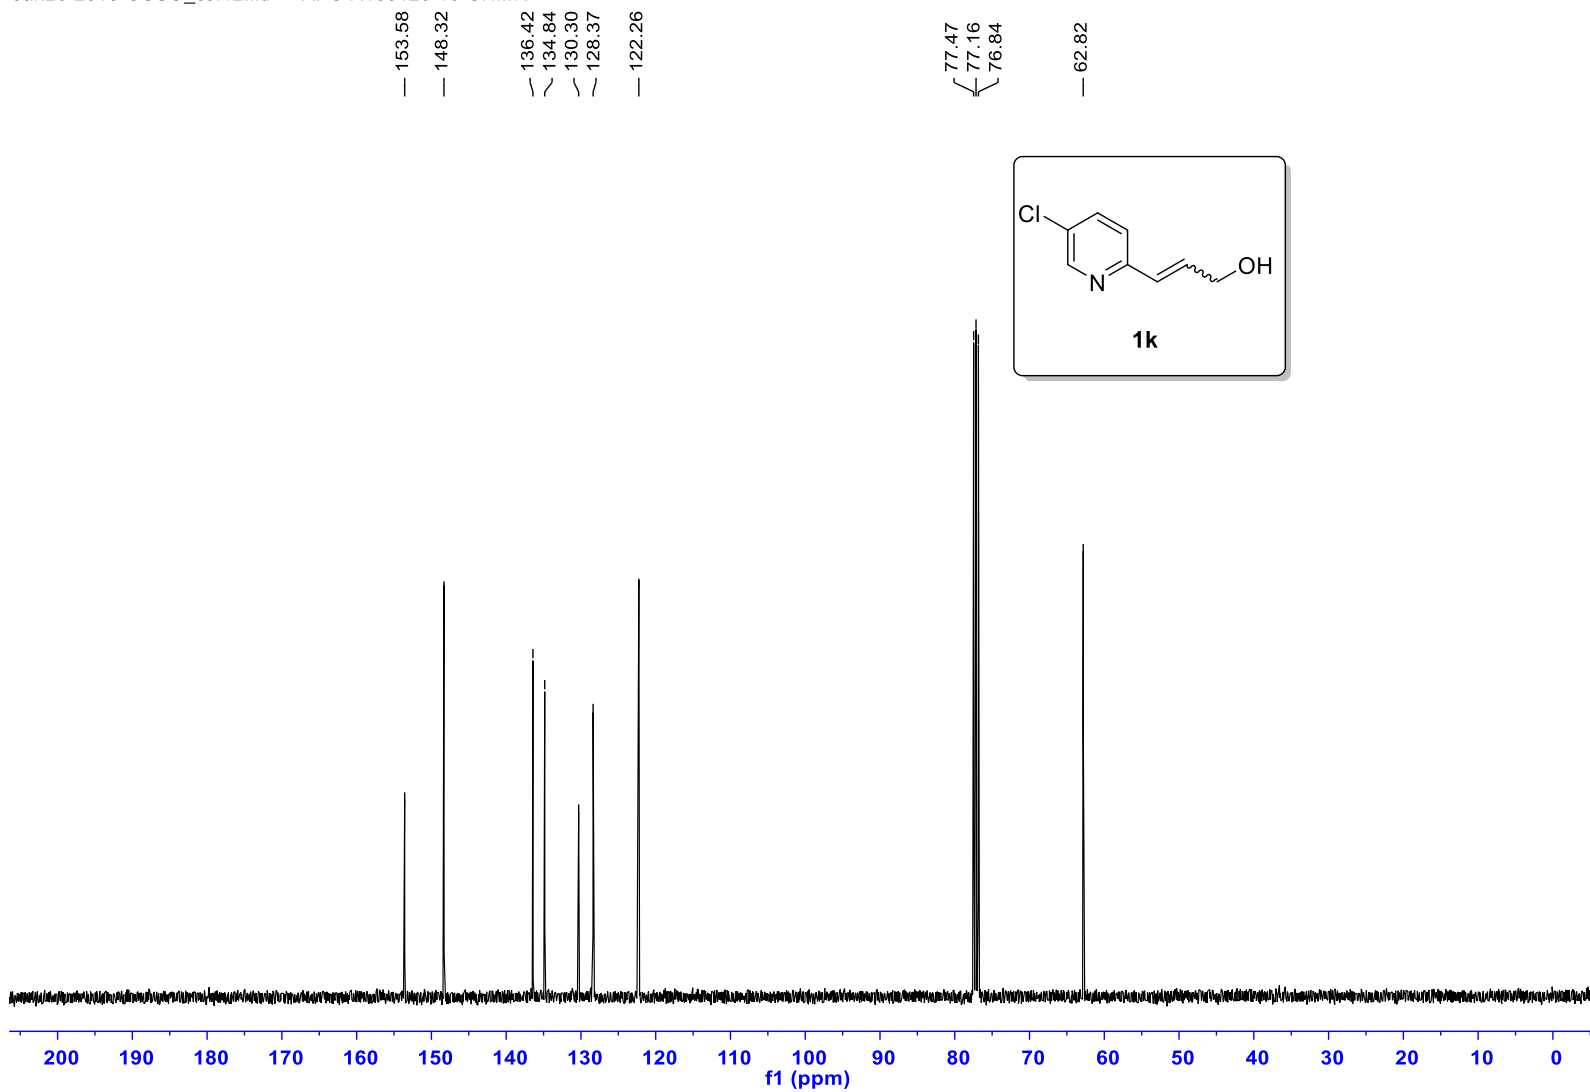



XPC-X191222-3Cl-HNMR.10.fid

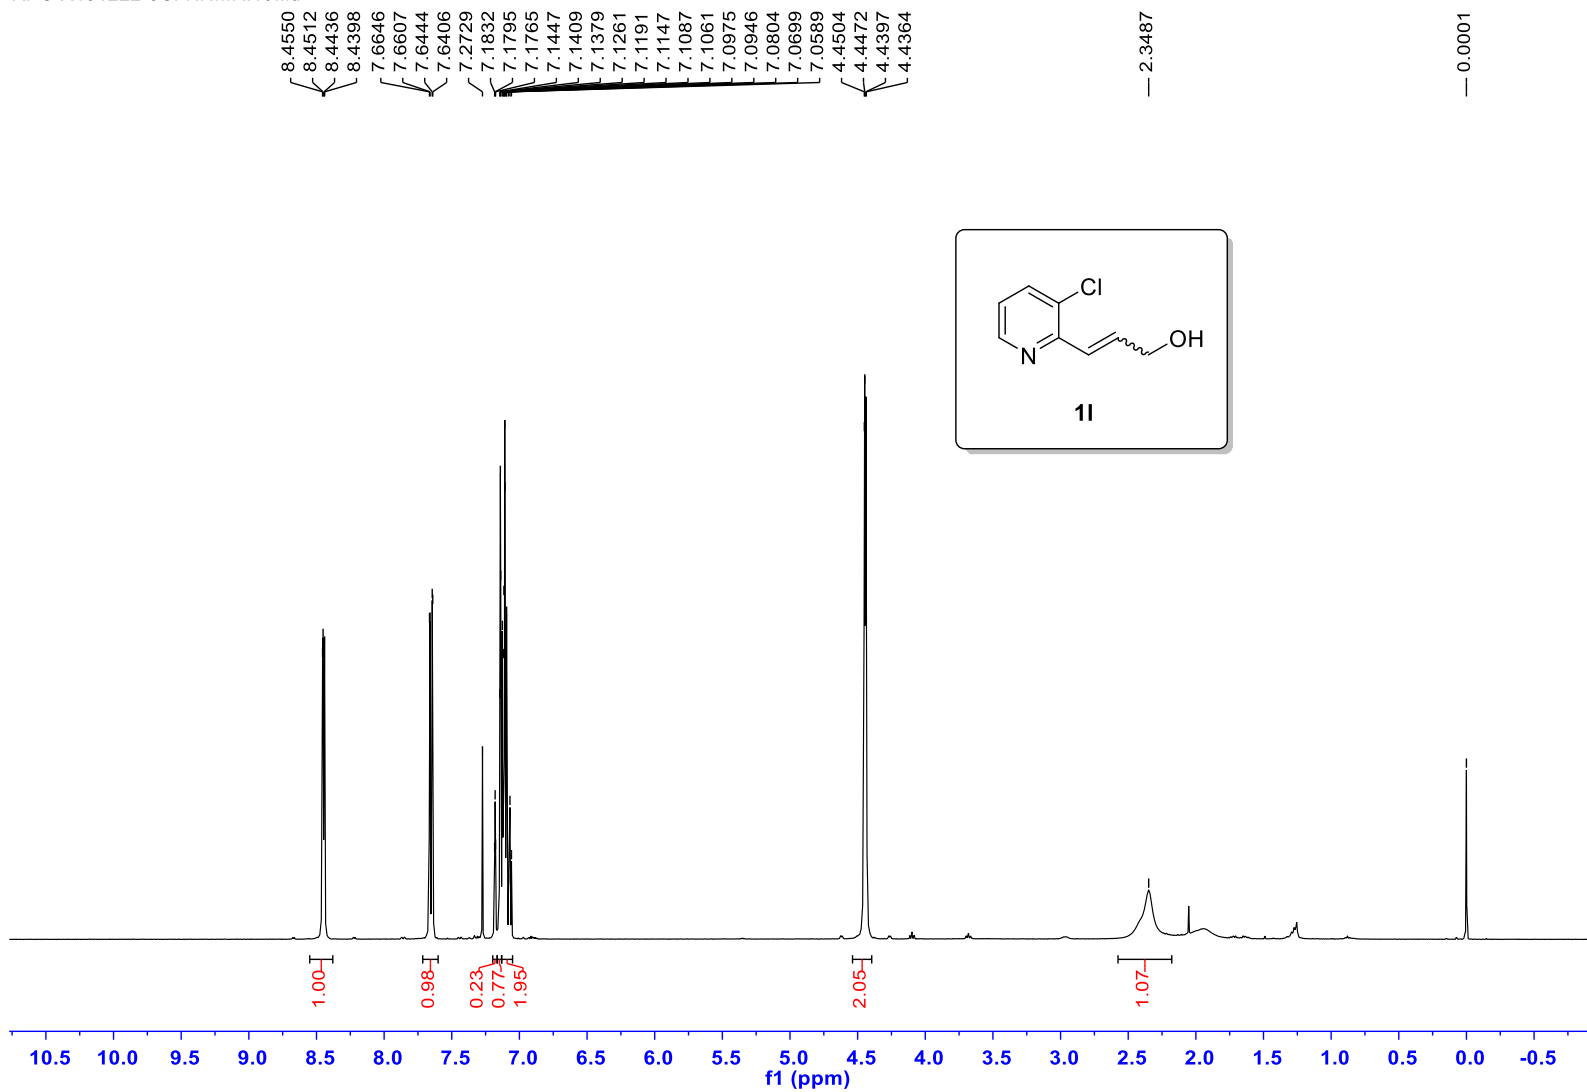

XPC-X191222-3Cl-CNMR.11.fid —

— 151.87  
— 147.49  
└─ 137.58  
└─ 137.04  
└─ 137.01  
— 130.32  
└─ 124.35  
└─ 123.12  
  
└─ 77.48  
└─ 77.16  
└─ 76.84  
  
— 63.17

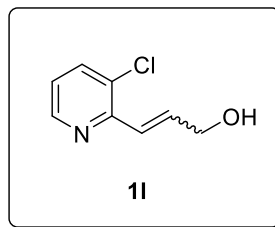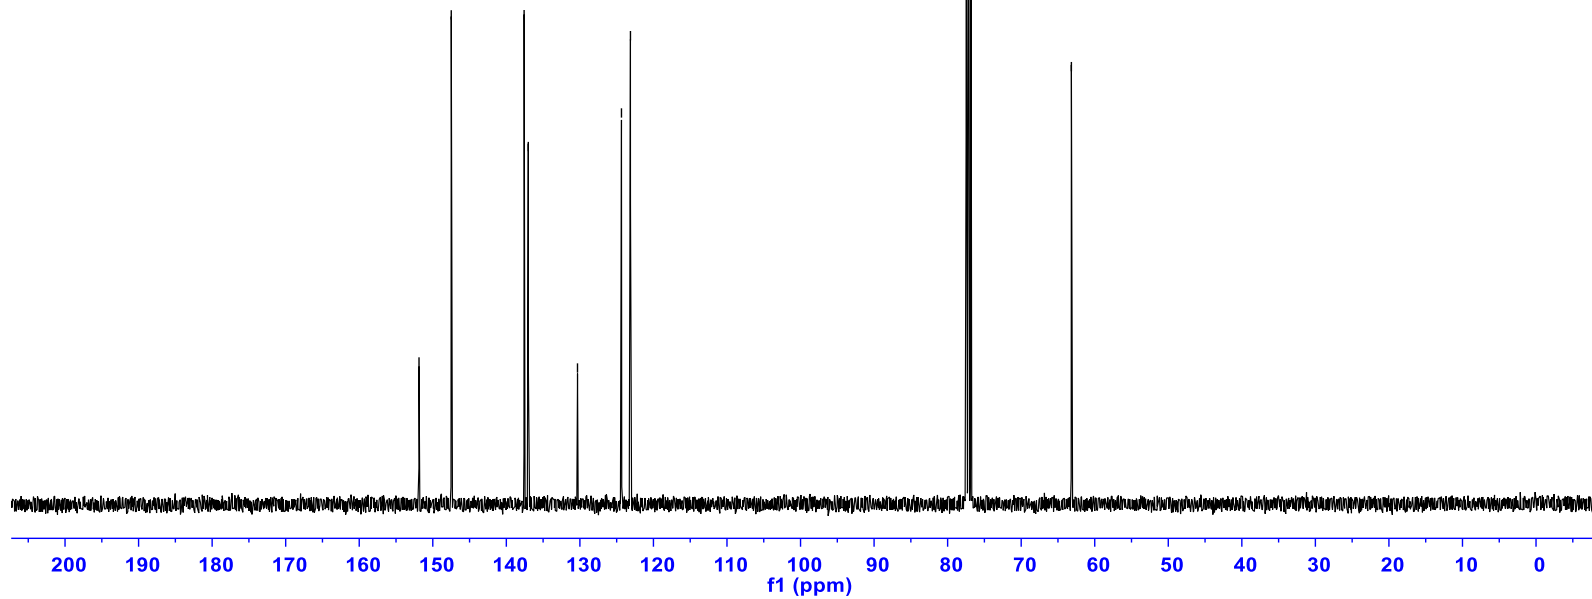

XPC-X191222-MIDING-HNMR.10.fid —

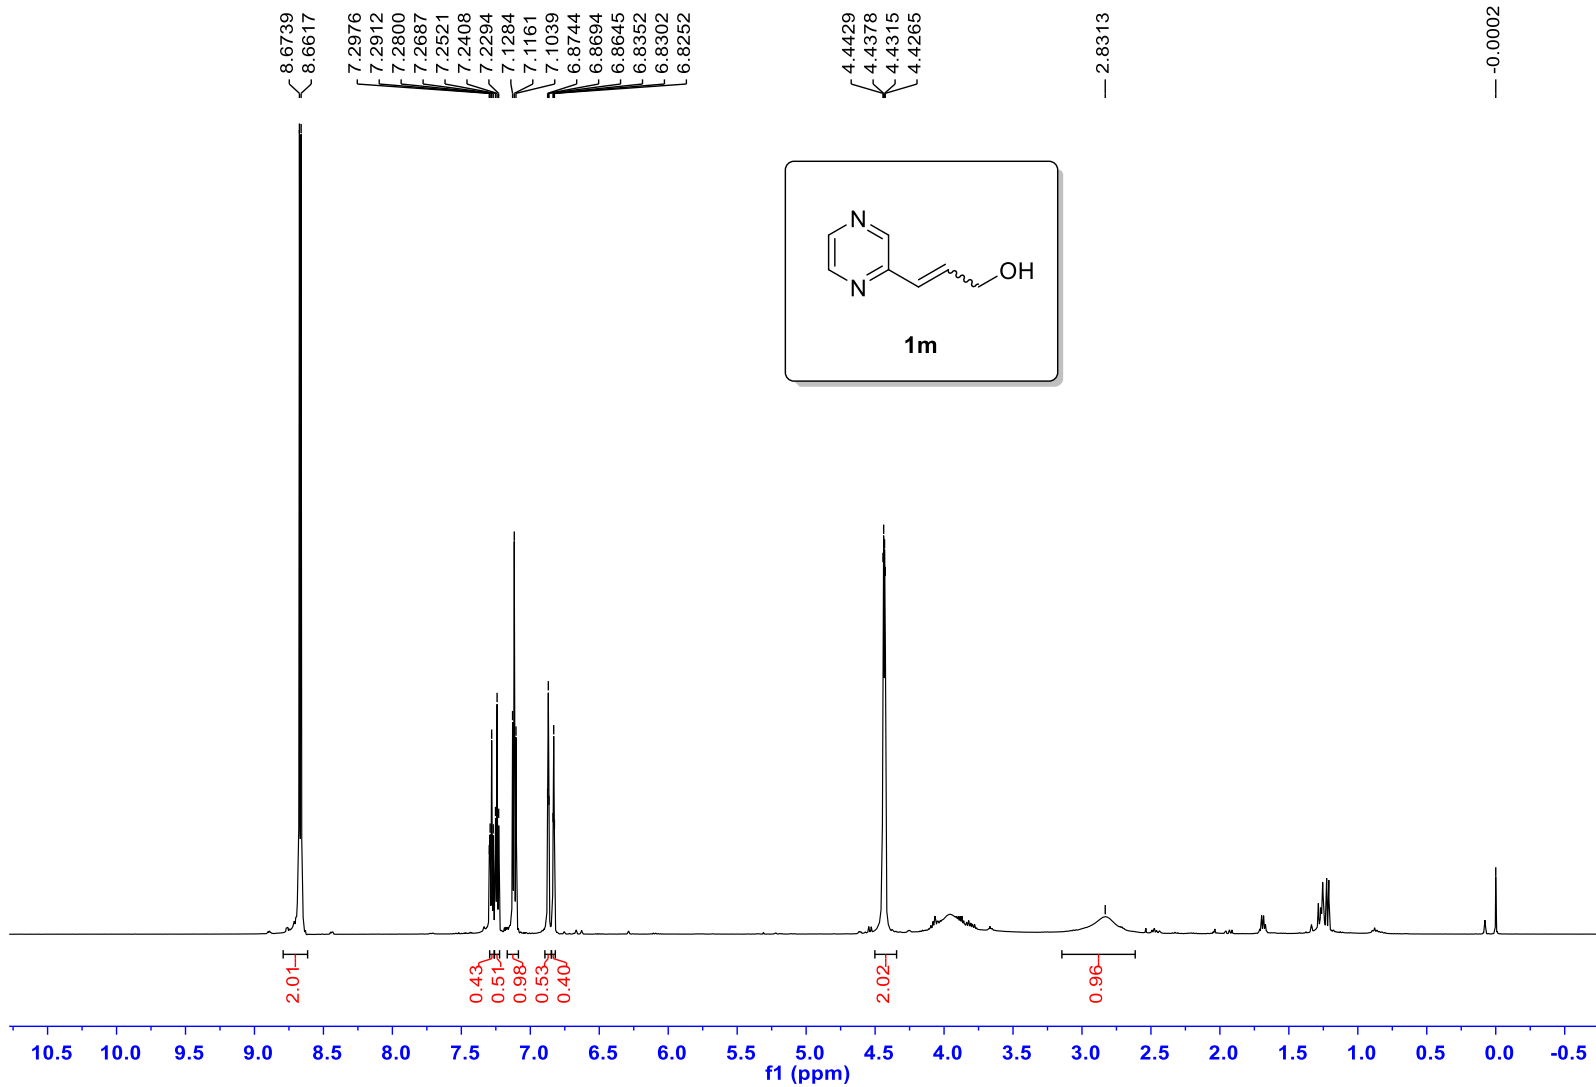

XPC-X191222-MIDING-CNMR.11.fid —

— 164.30 —  
— 157.09 —  
— 140.80 —  
— 128.27 —  
— 118.87 —  
77.48  
77.16  
76.84  
— 62.40 —

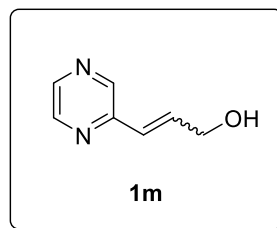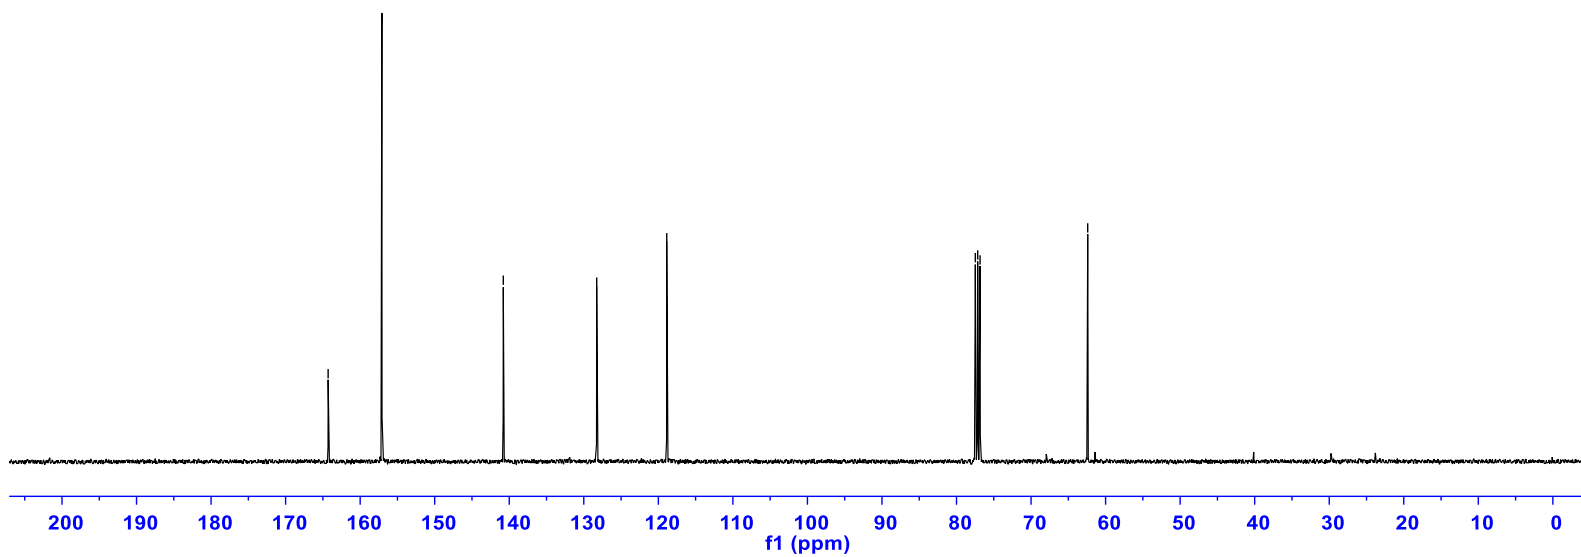

Jan26-2018-OSSO\_cj.45.fid — XPC-X180126-12-HNMR

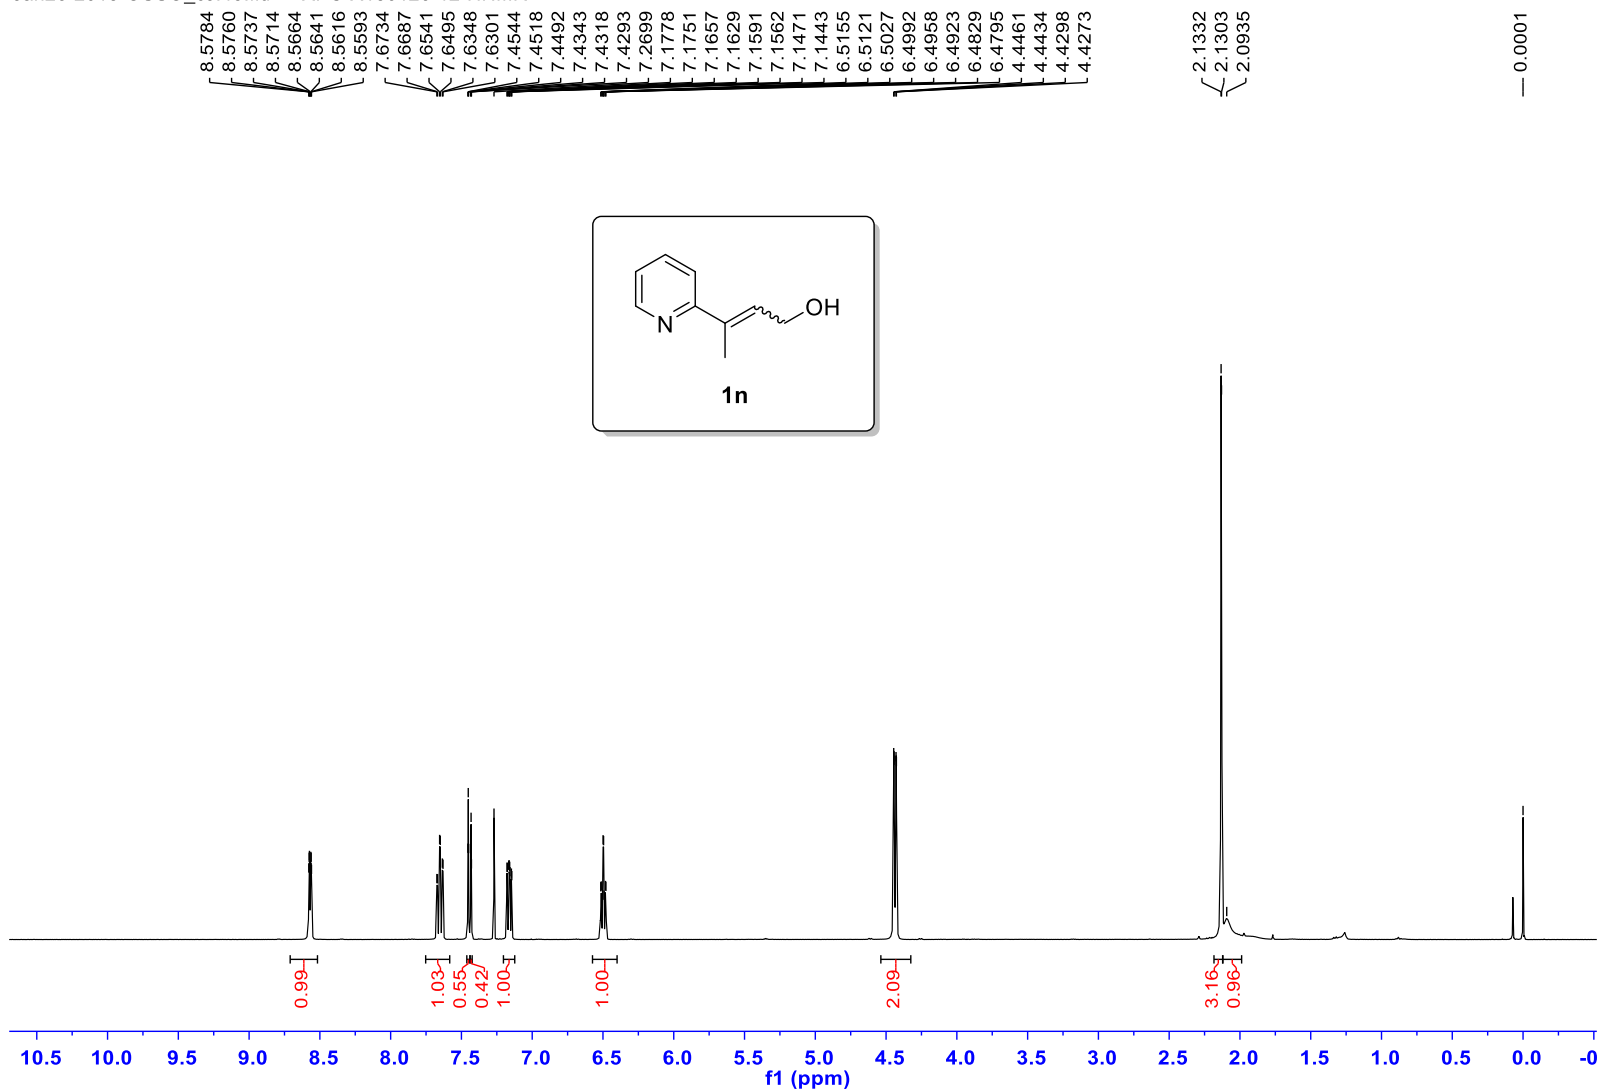

Jan26-2018-OSSO\_cJ.46.fid — XPC-X180126-12-CNMR

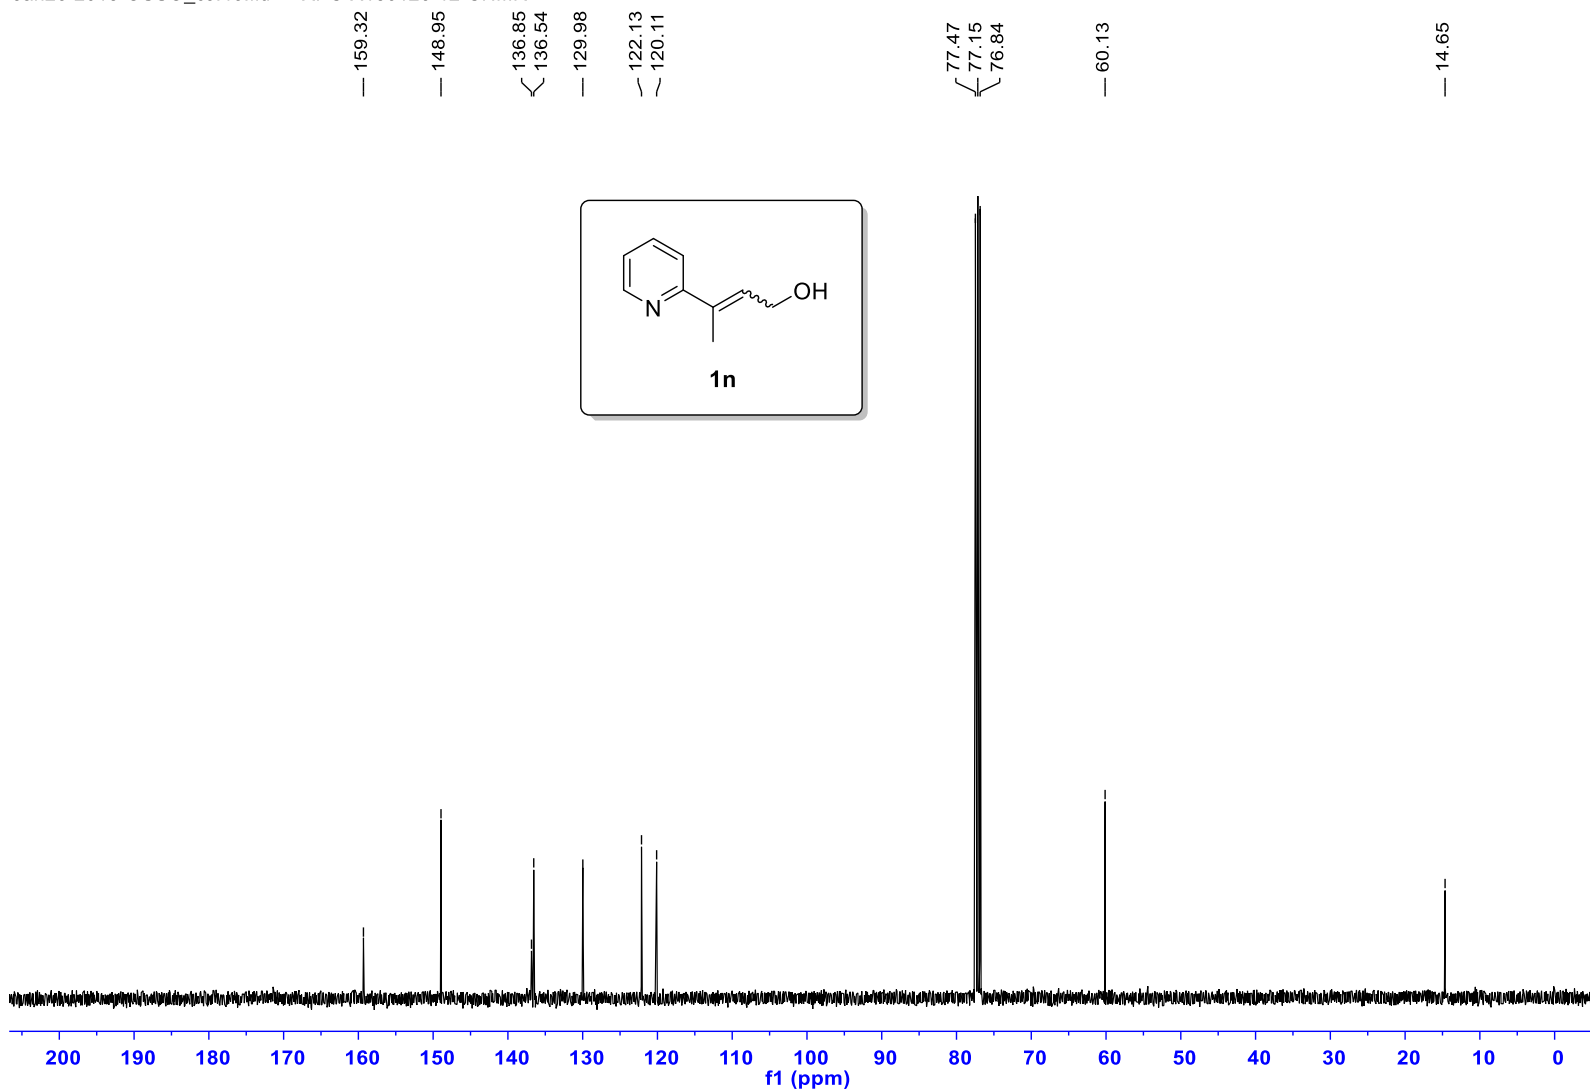

XPC-X191222-zhilian2-Me-HNMR.10.fid

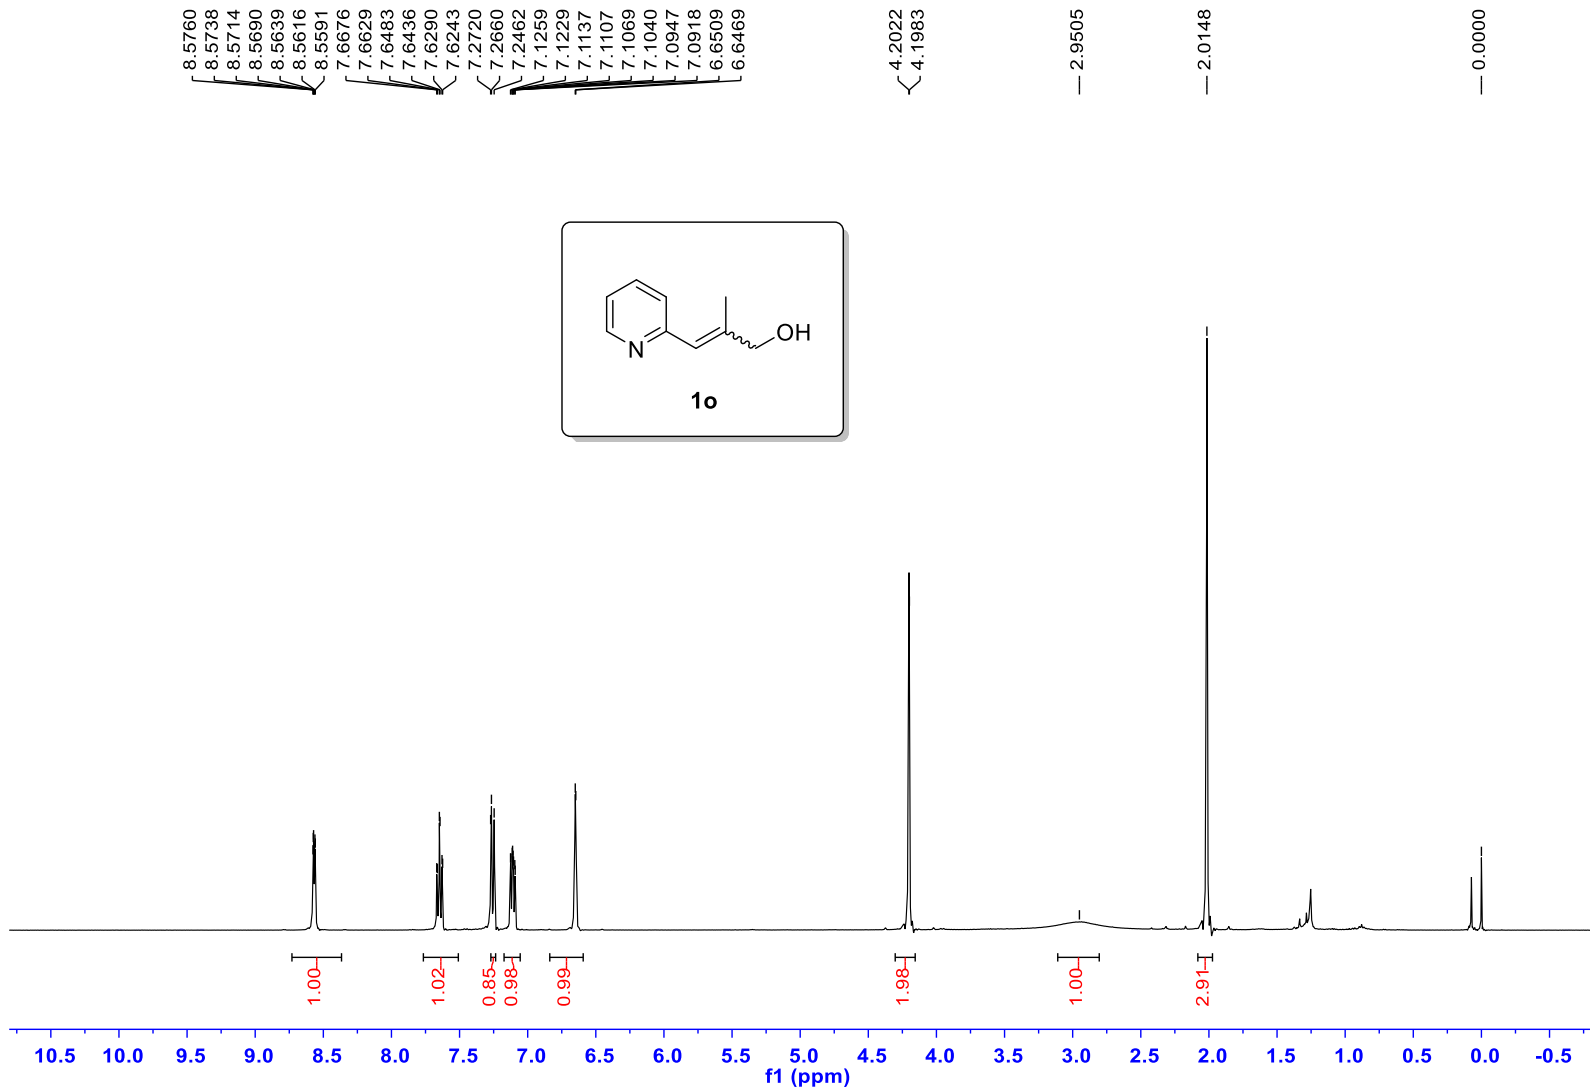

XPC-X191222-zhilian2-Me-CNMR.11.fid

156.89

149.02

143.07

136.31

124.17

123.33

121.16

77.48

77.16

76.84

68.05

15.54

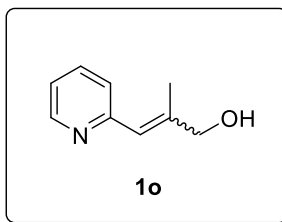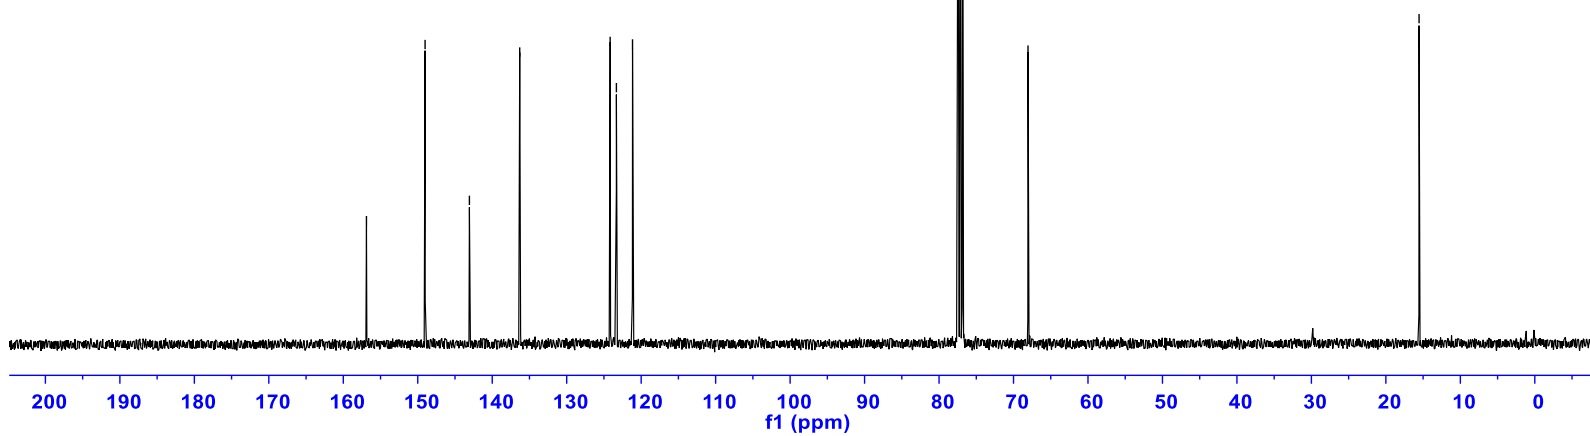



Jan26-2018-OSSO\_cJ.25.fid — XPC-X180126-3-HNMR

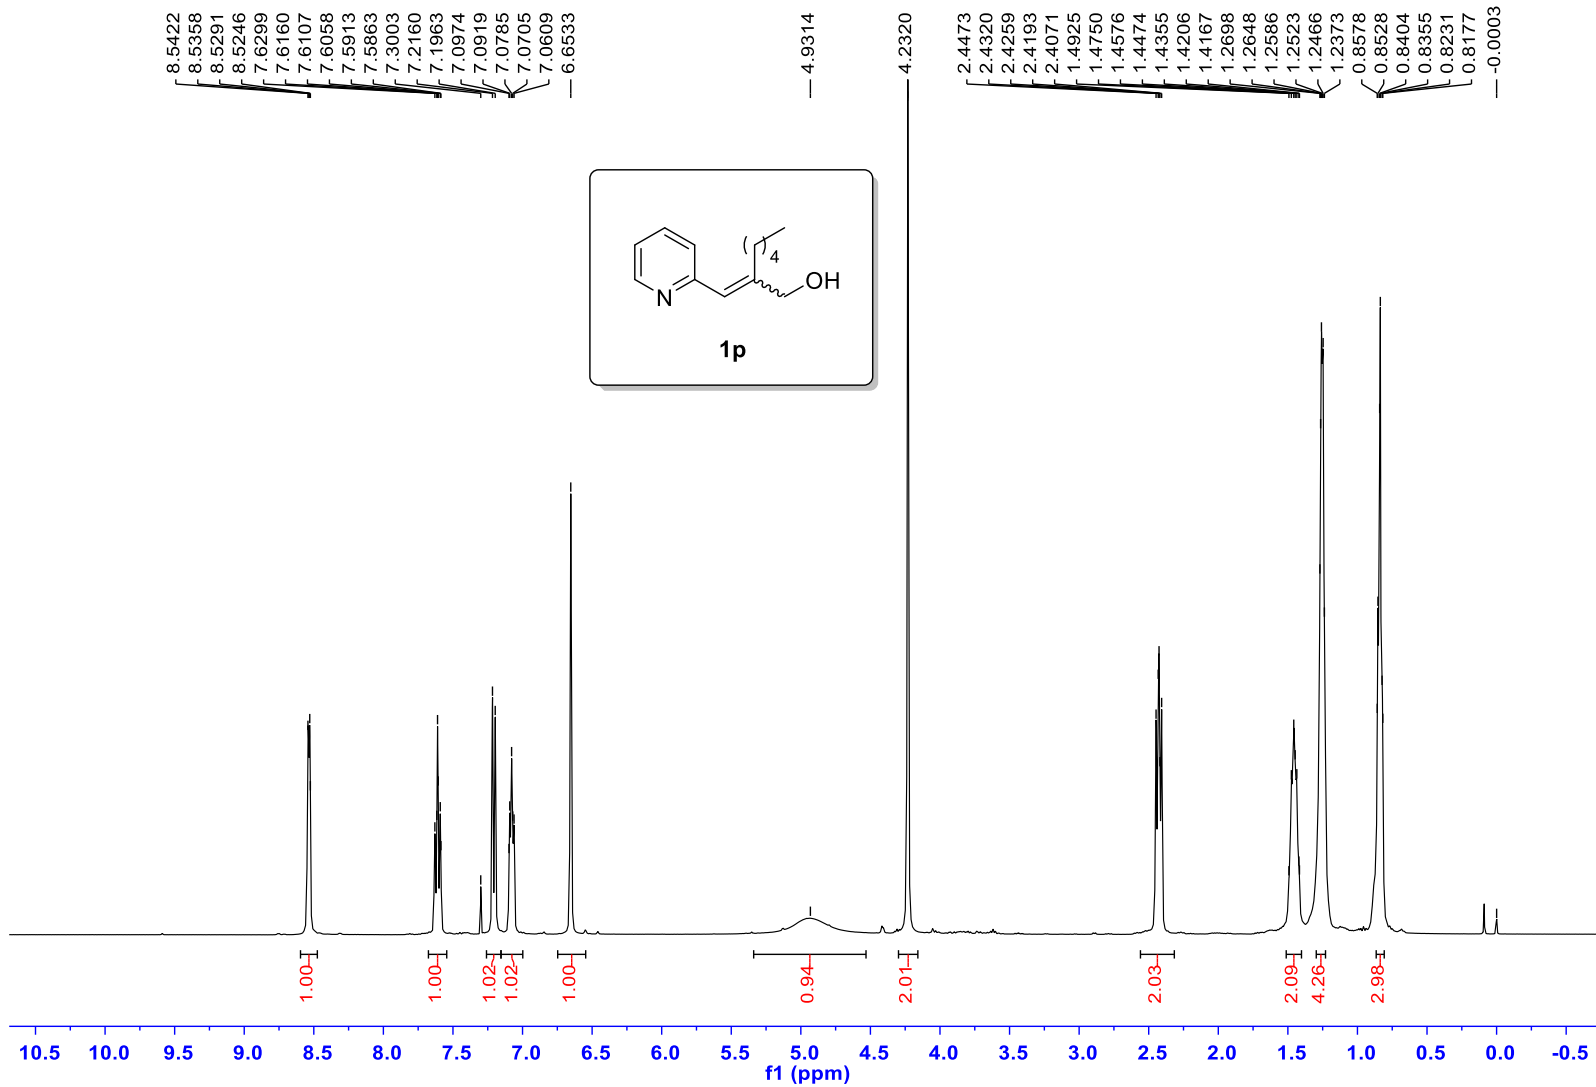

Jan26-2018-OSSO\_cJ.26.fid — XPC-X180126-3-CNMR

— 156.95  
— 148.84  
— 147.86  
— 136.19

— 123.76  
— 122.84  
— 120.95

— 65.83

— 32.02  
— 28.93  
— 27.99  
— 22.38

— 14.01

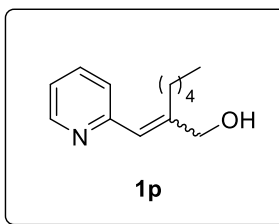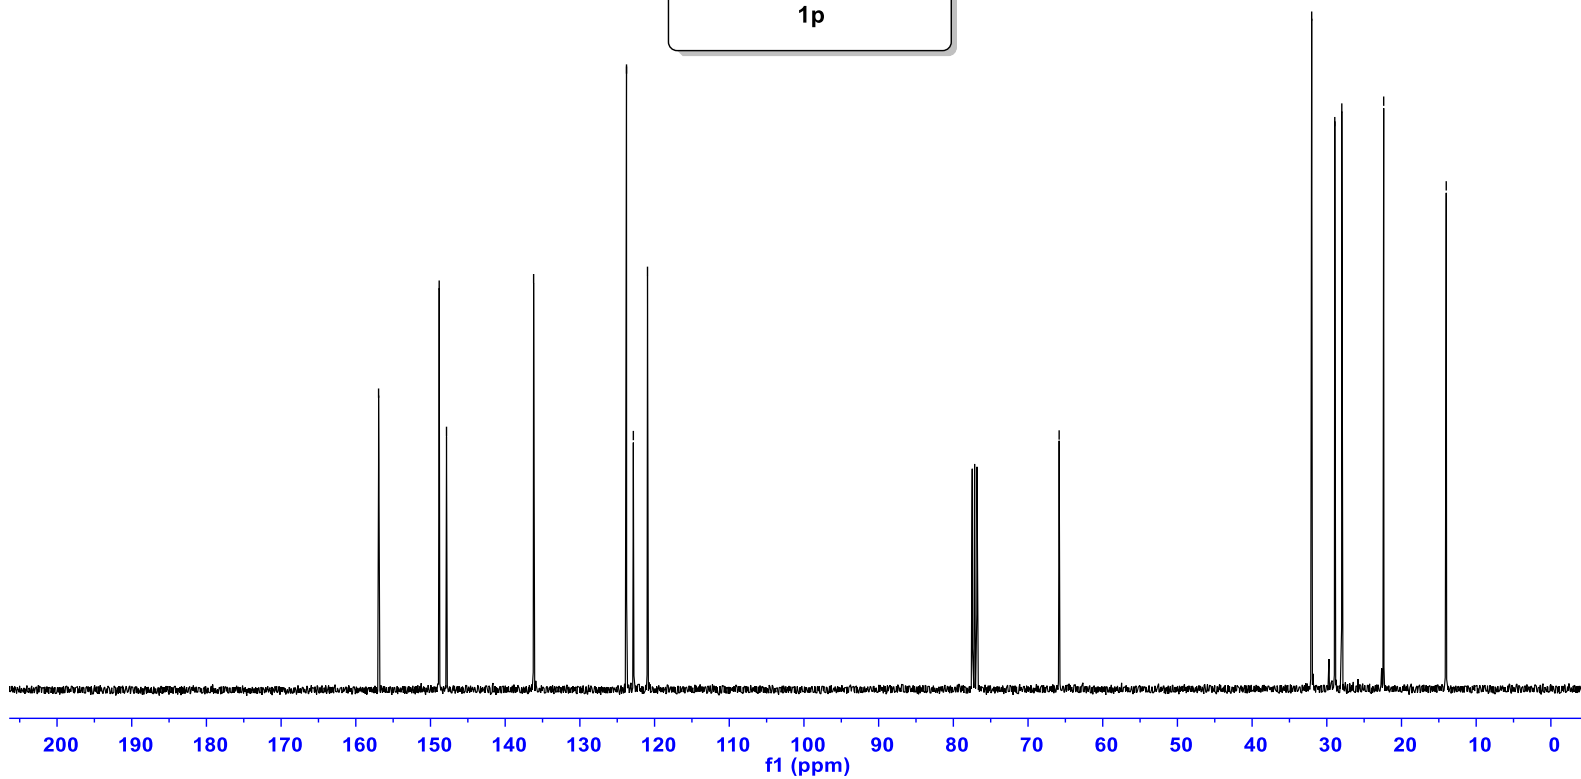

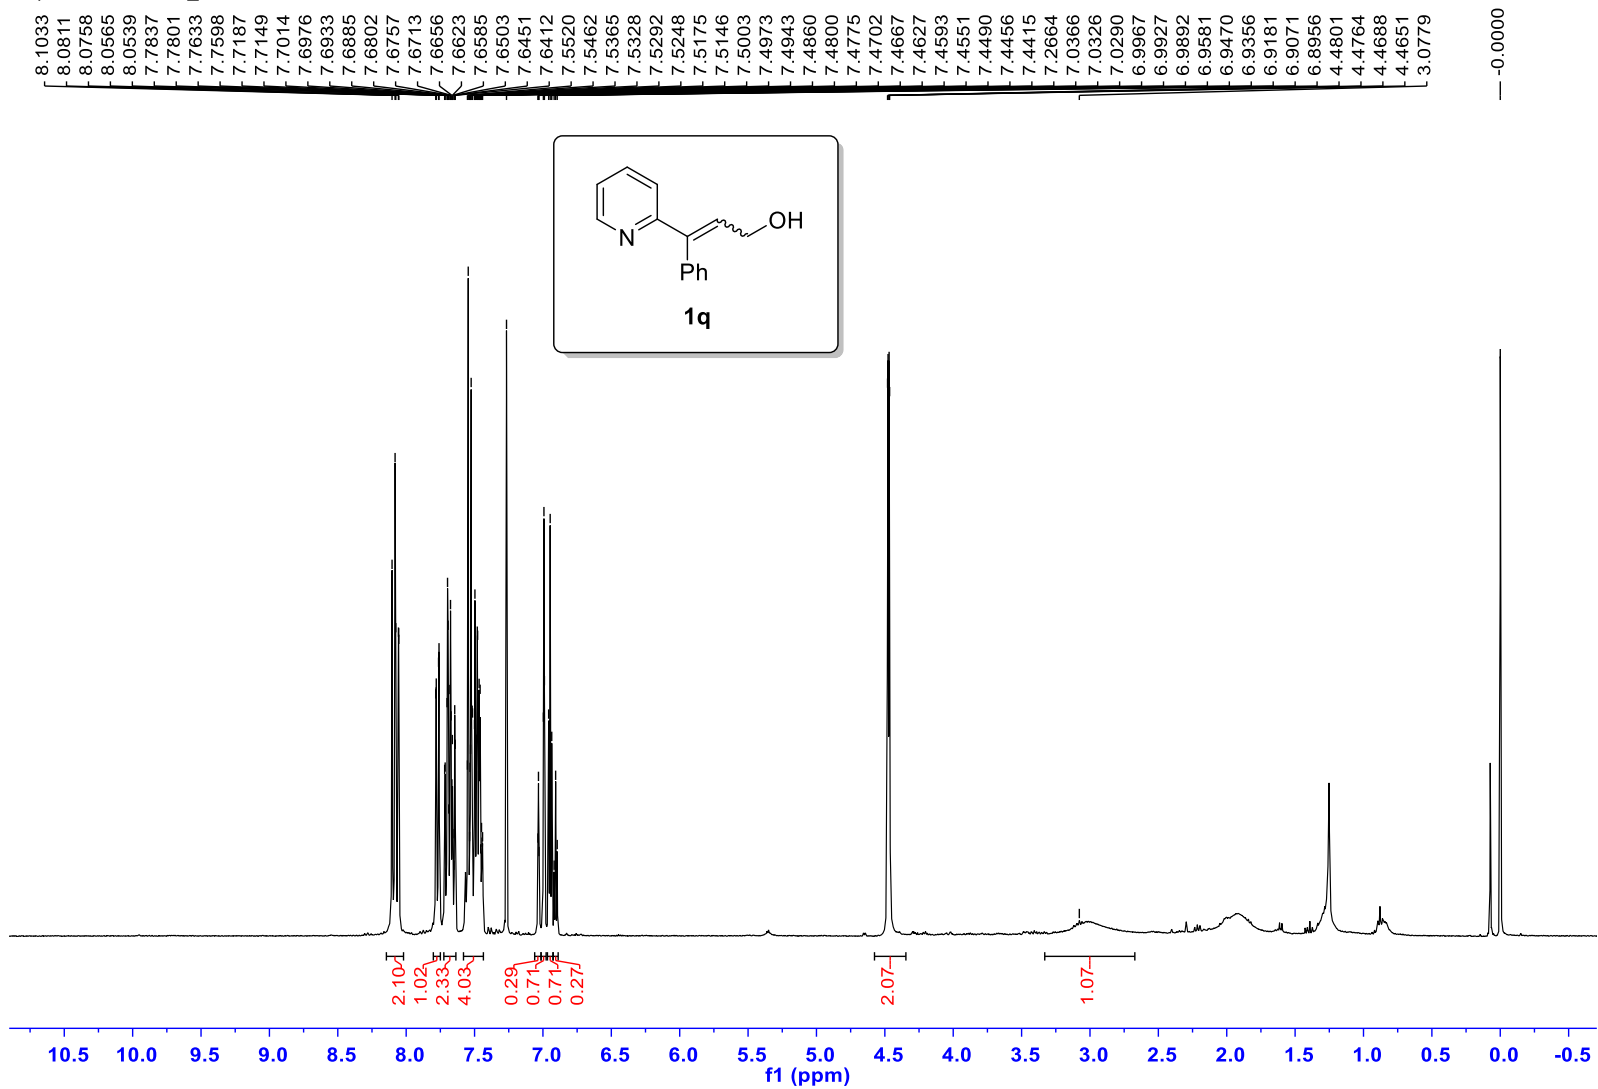

Dec01-2020-OSSO\_cj.20.fid — XPC-X201201-1

— 156.19

— 148.72

— 147.21

— 138.31

— 135.77

— 128.78

— 128.44

— 127.77

— 125.24

— 123.97

— 121.30

— 67.04

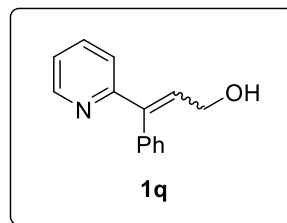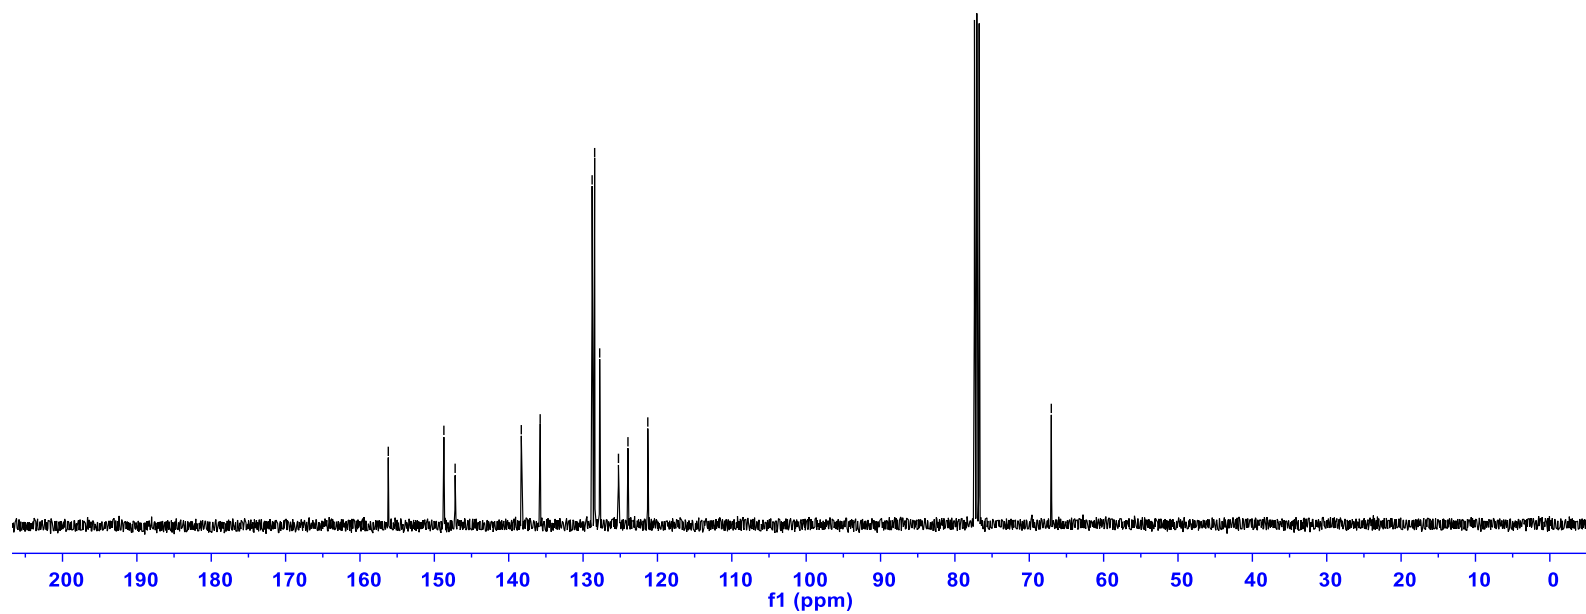

Dec27-2017-OSSO-CJ.55.fid — XPC-X17Z27-1-HNMR

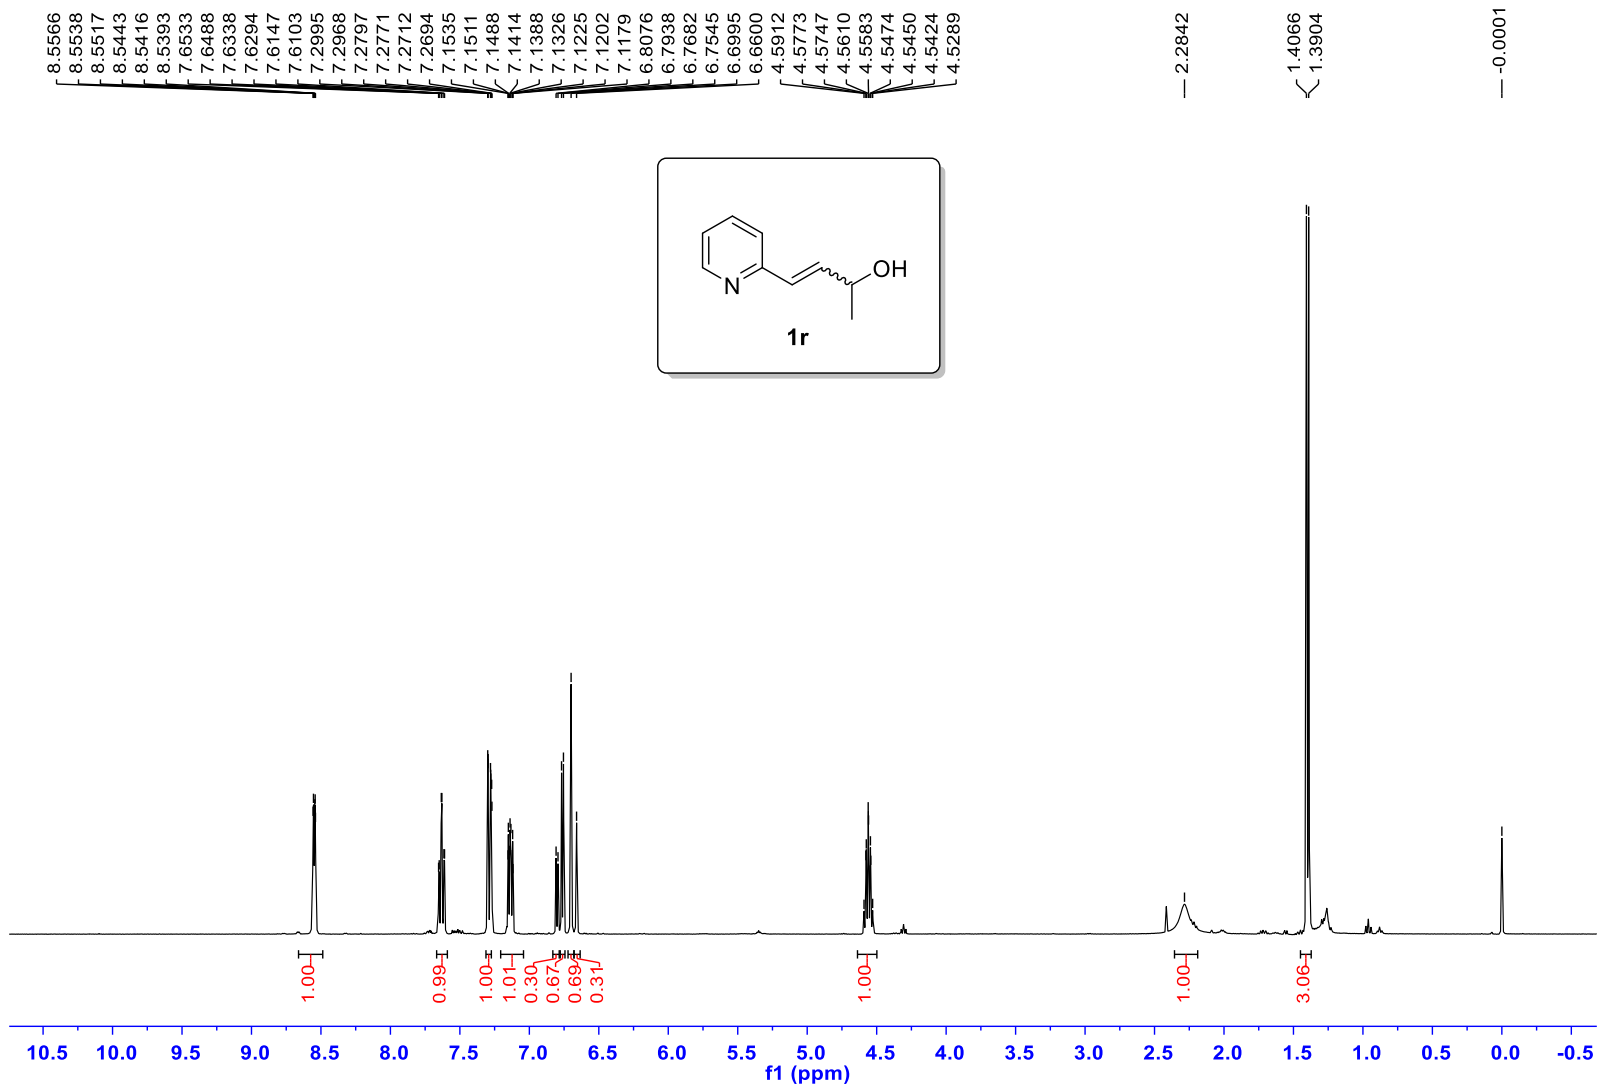

Dec27-2017-OSSO-CJ.56.fid — XPC-X17Z27-1-CNMR

— 155.37 — 149.58 — 138.46 — 136.71 — 128.75 — 122.30 — 121.86 — 77.47 — 77.16 — 76.84 — 68.44 — 23.43

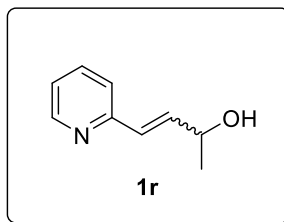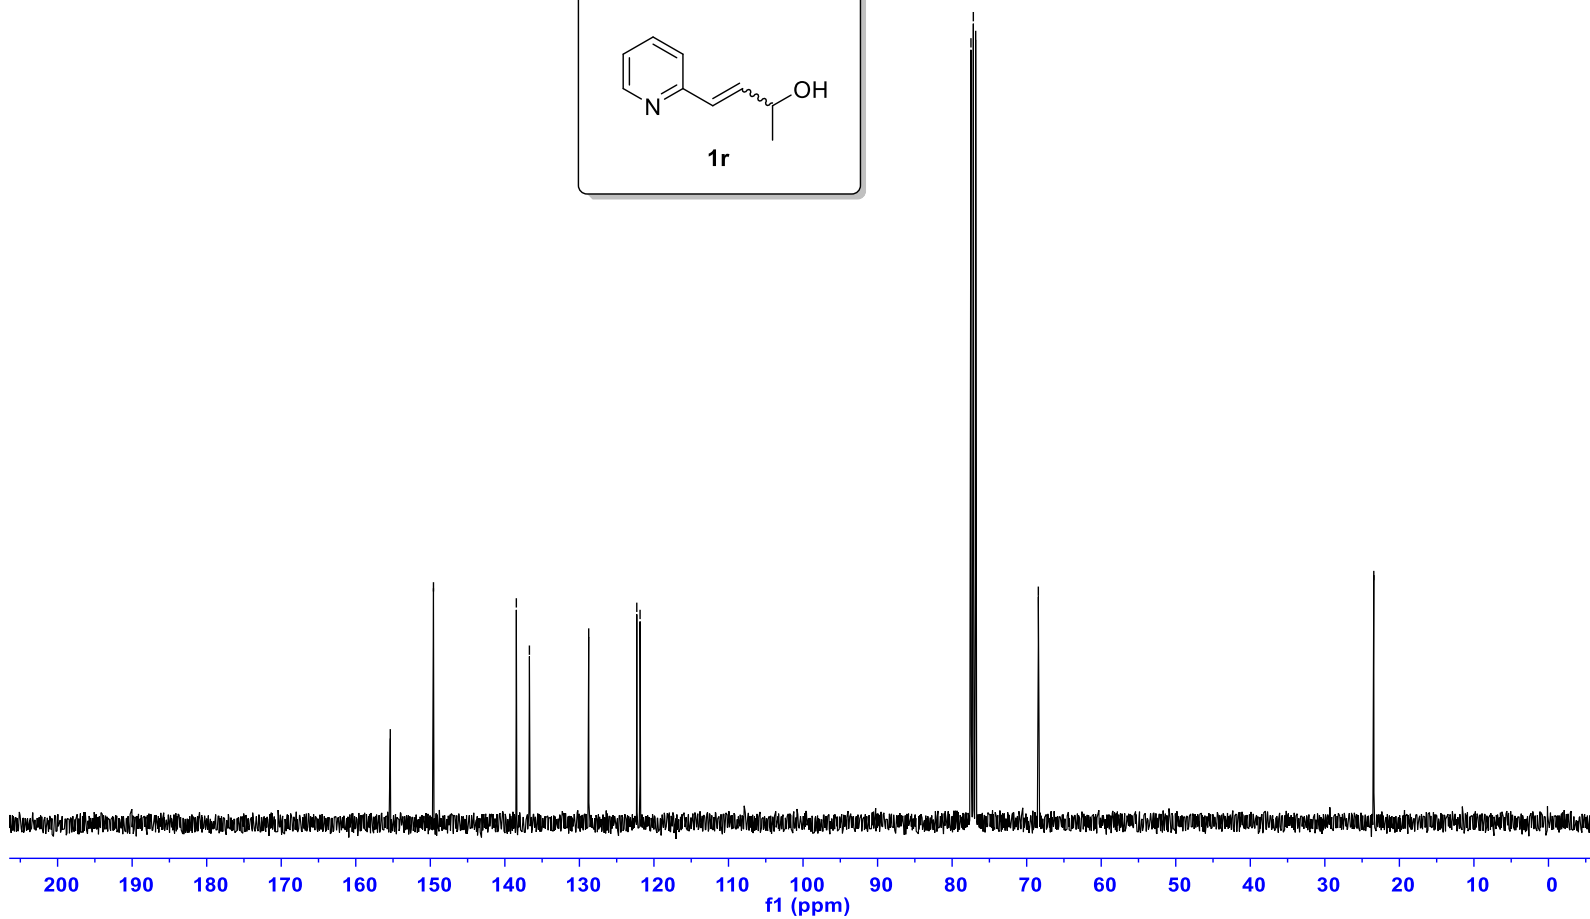

May12-2019-OSSO\_cJ.9.fid — XPC-X181213-1-HNMR-BZ-2a

9.1369  
9.1342  
9.1184  
9.1155  
7.6765  
7.6578  
7.6548  
7.6356  
7.4822  
7.4794  
7.4765  
7.4600  
7.4572  
7.4543  
7.3476  
7.3444  
7.3313  
7.3281  
7.3255  
7.3220  
7.3090  
7.3058  
7.2741  
7.0155  
7.0119  
6.9994  
6.9965  
6.9807  
6.9771  
6.6579  
6.6399  
6.6362  
6.6330  
6.6140  
6.6111

— -0.0001

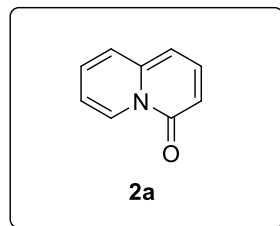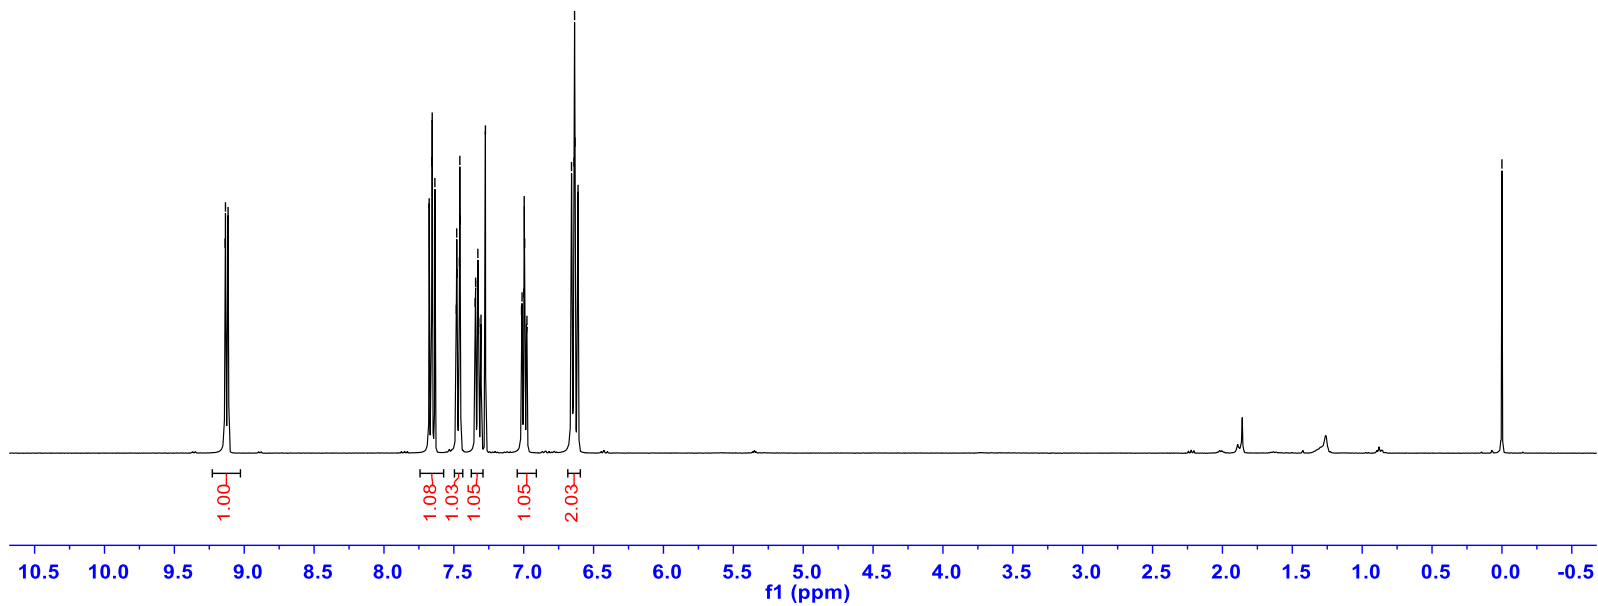

May12-2019-OSSO\_cj.10.fid — XPC-X181213-1-CNMR-BZ-2a

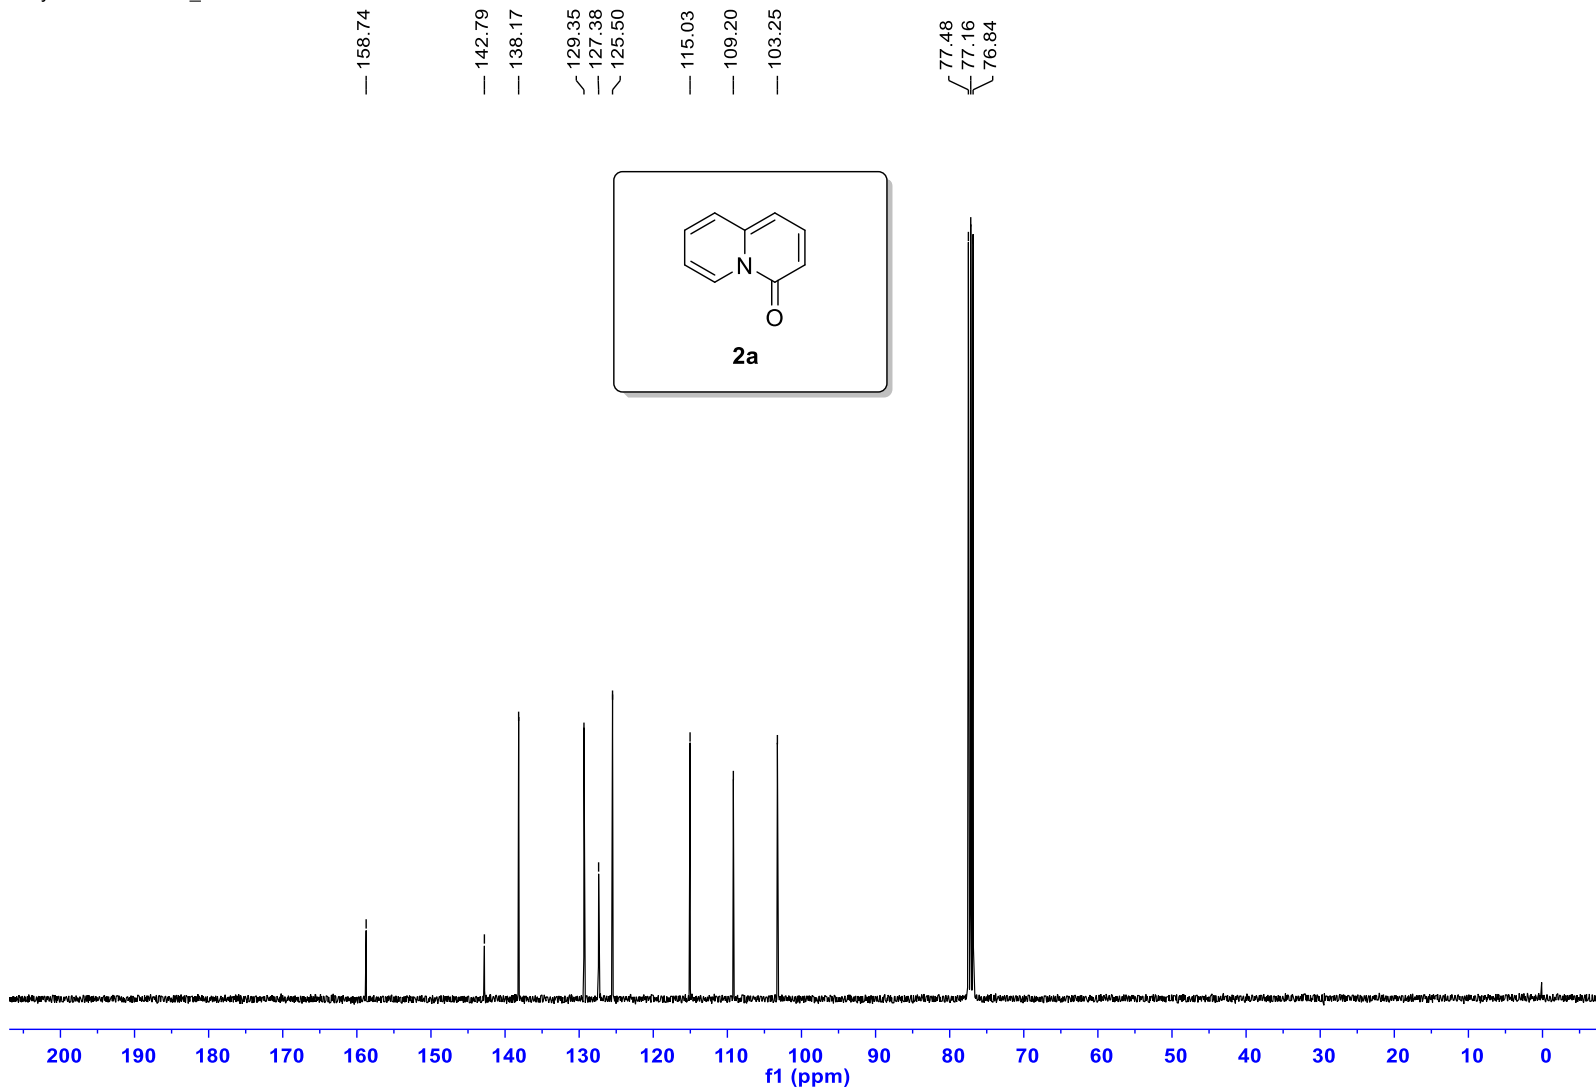



Dec13-2018-OSSO\_cJ.43.fid — XPC-X181213-2HNMR

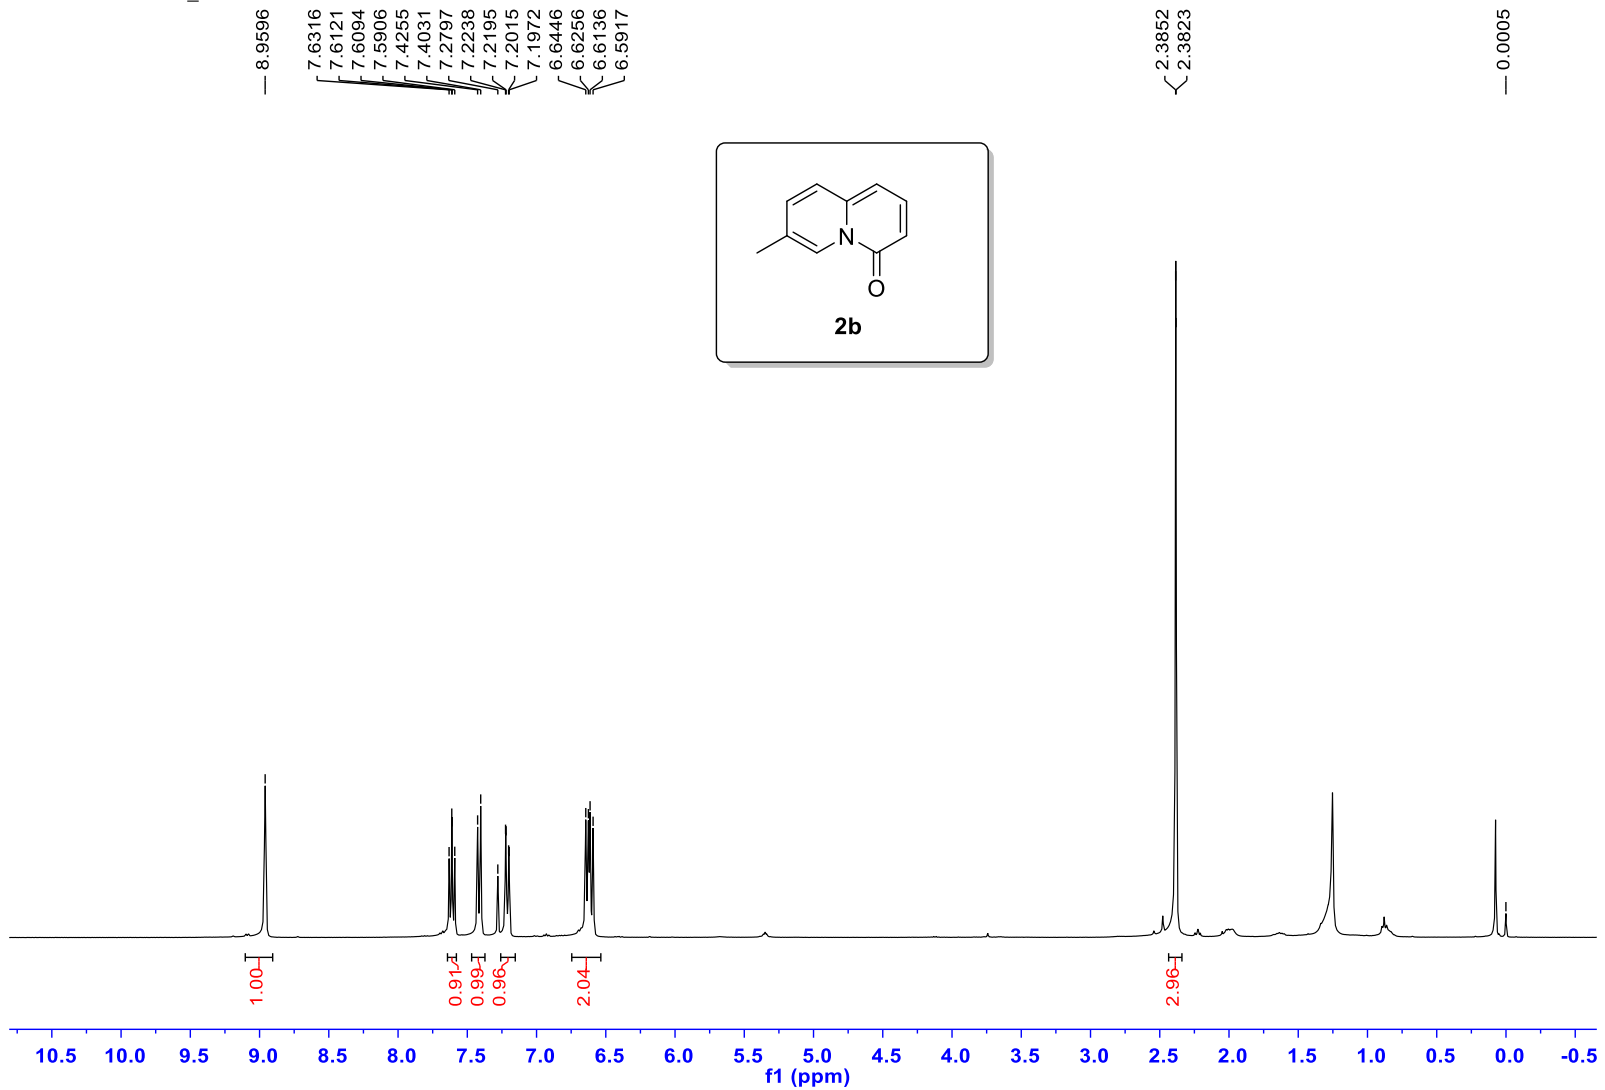

Sep20-2018-OSSO\_cJ.25.fid — XPC-X181213-2-CNMR(5Me-2c)

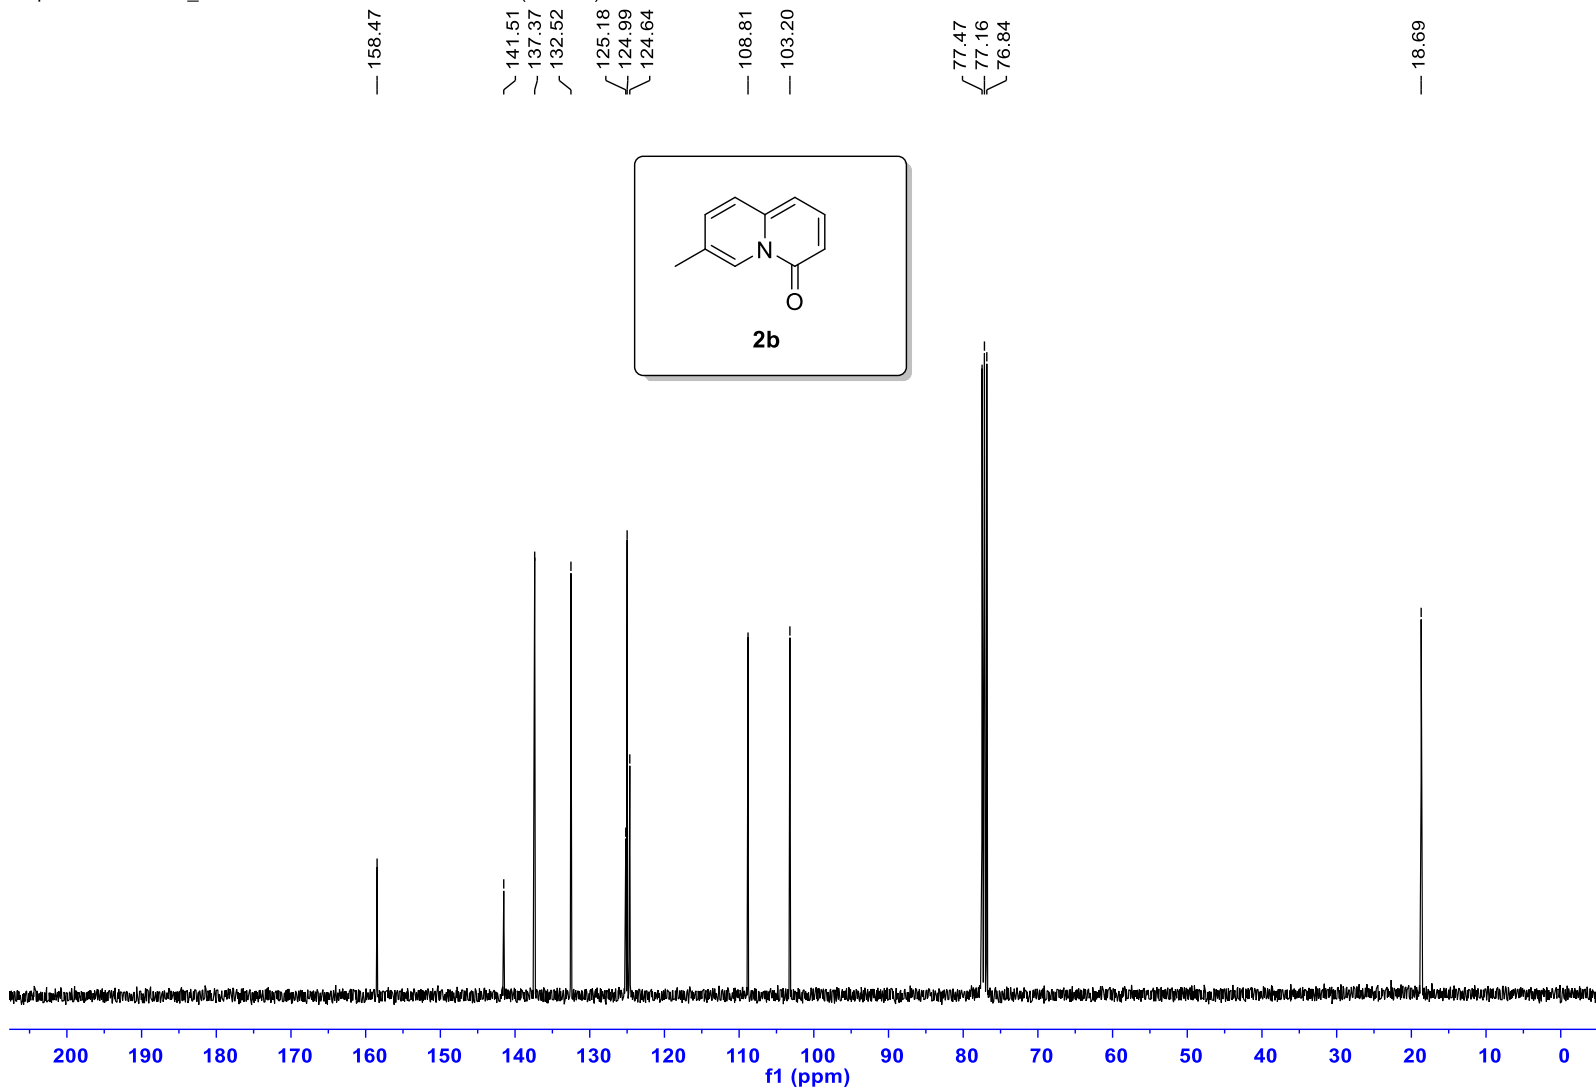

Dec13-2018-OSSO\_cJ.45.fid — XPC-X181213-3HNMR

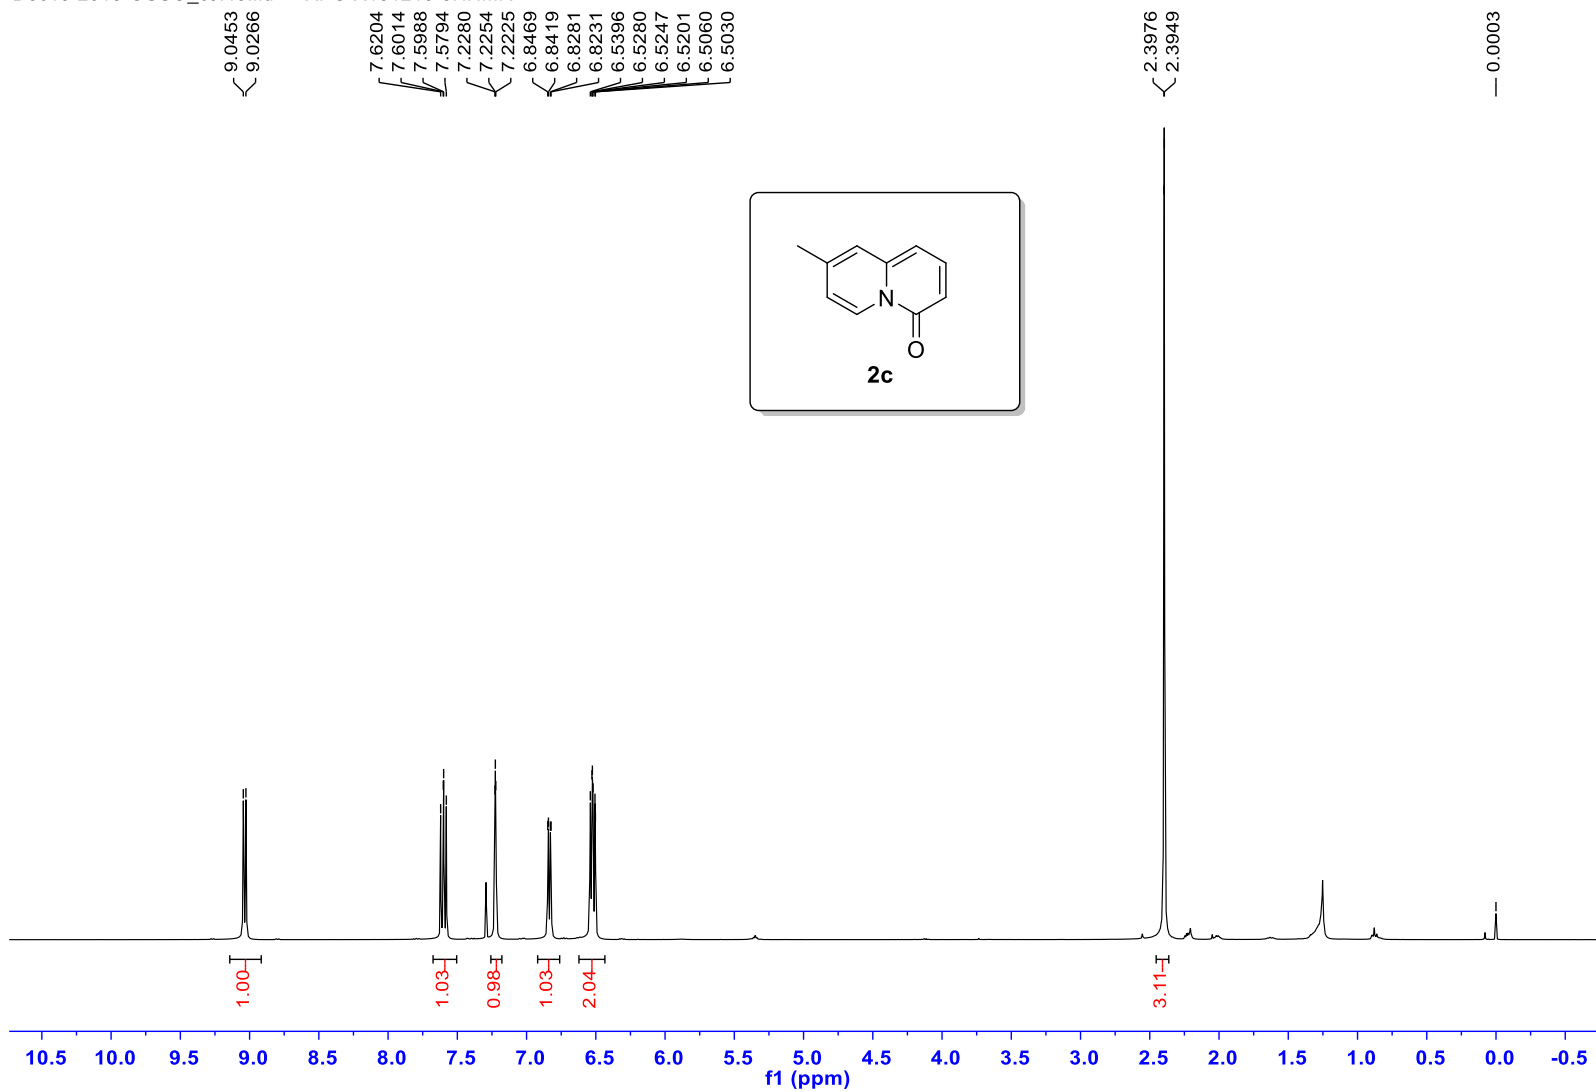

Dec13-2018-OSSO\_cJ.46.fid — XPC-X181213-3CNMR

— 158.67

— 142.96

— 140.73

— 138.28

— 126.87

— 123.38

— 117.85

— 107.57

— 102.12

— 77.47

— 77.15

— 76.84

— 21.15

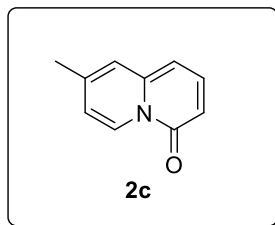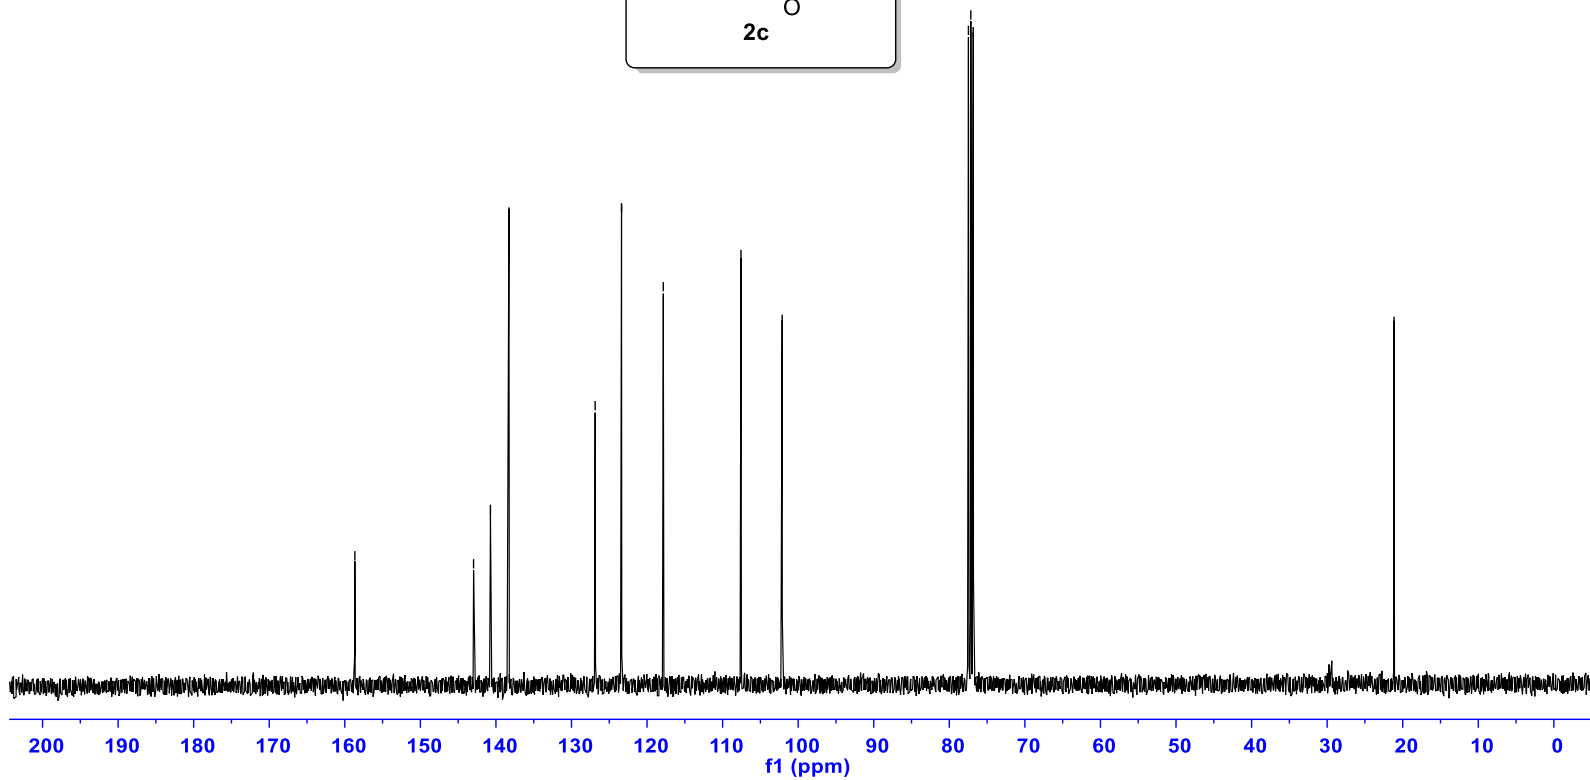

Feb02-2018-OSSO\_cJ.46.fid — XPC-X180110-2-HNMR(3Me-2e)

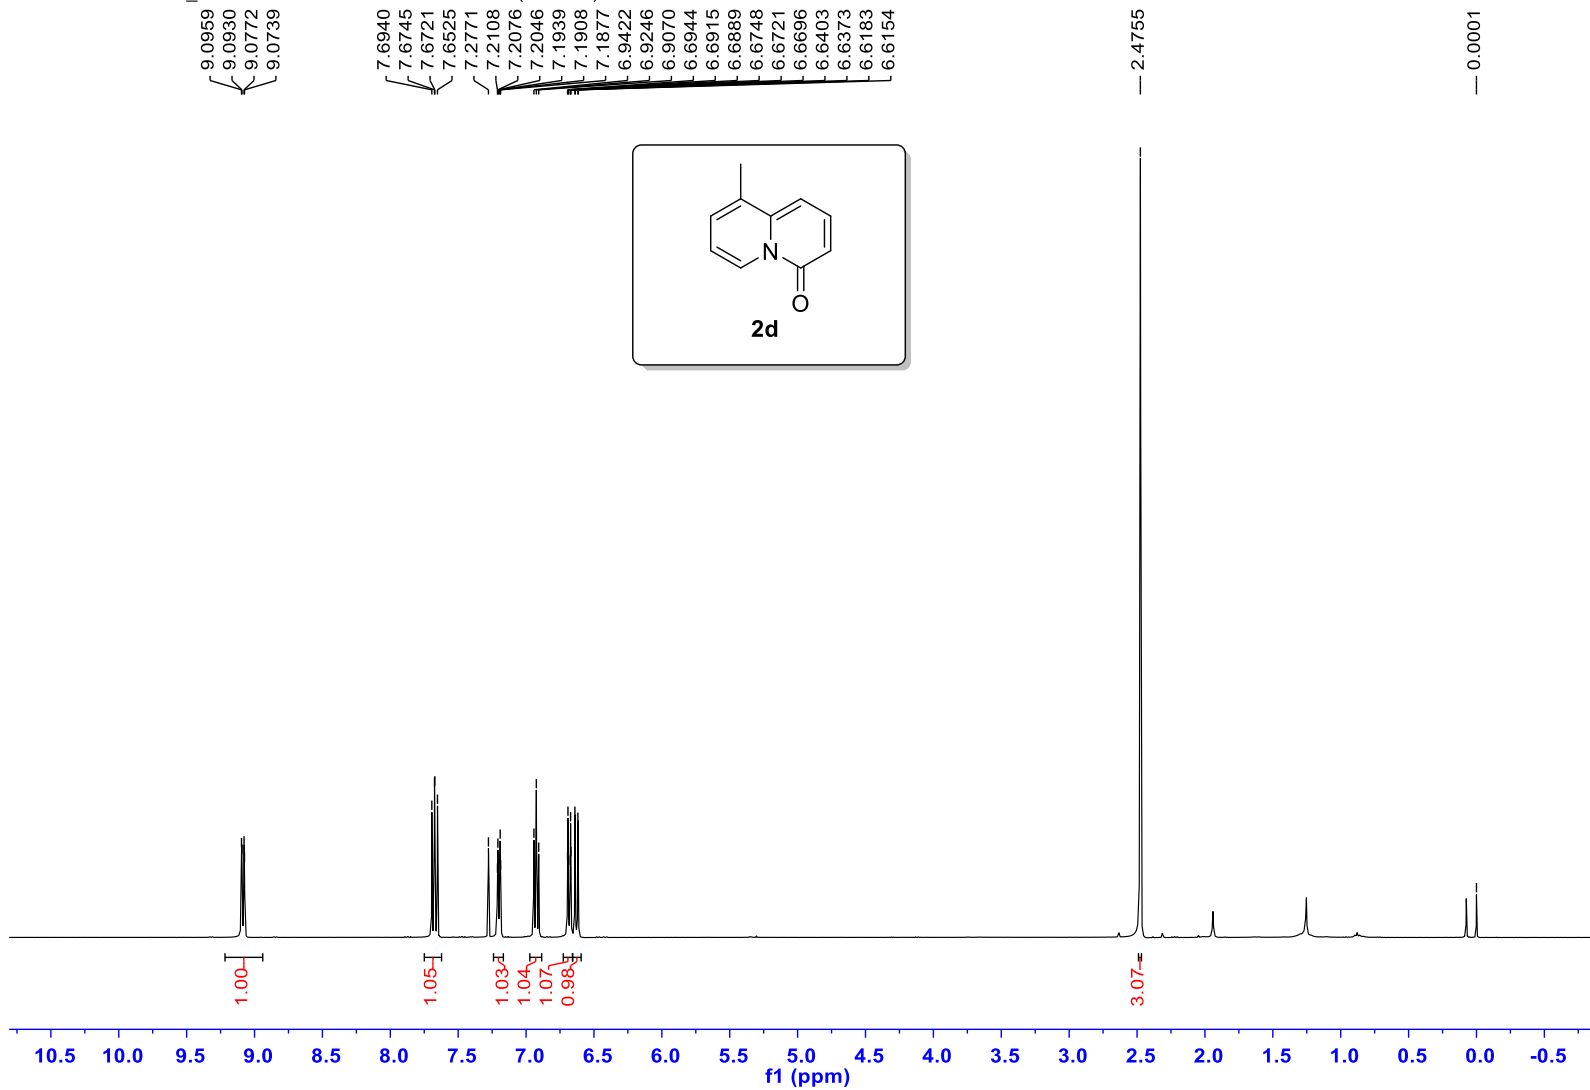

Sep10-2018-OSSO\_cJ.29.fid — XPC-X180110-2-CNMR(3Me-2e)

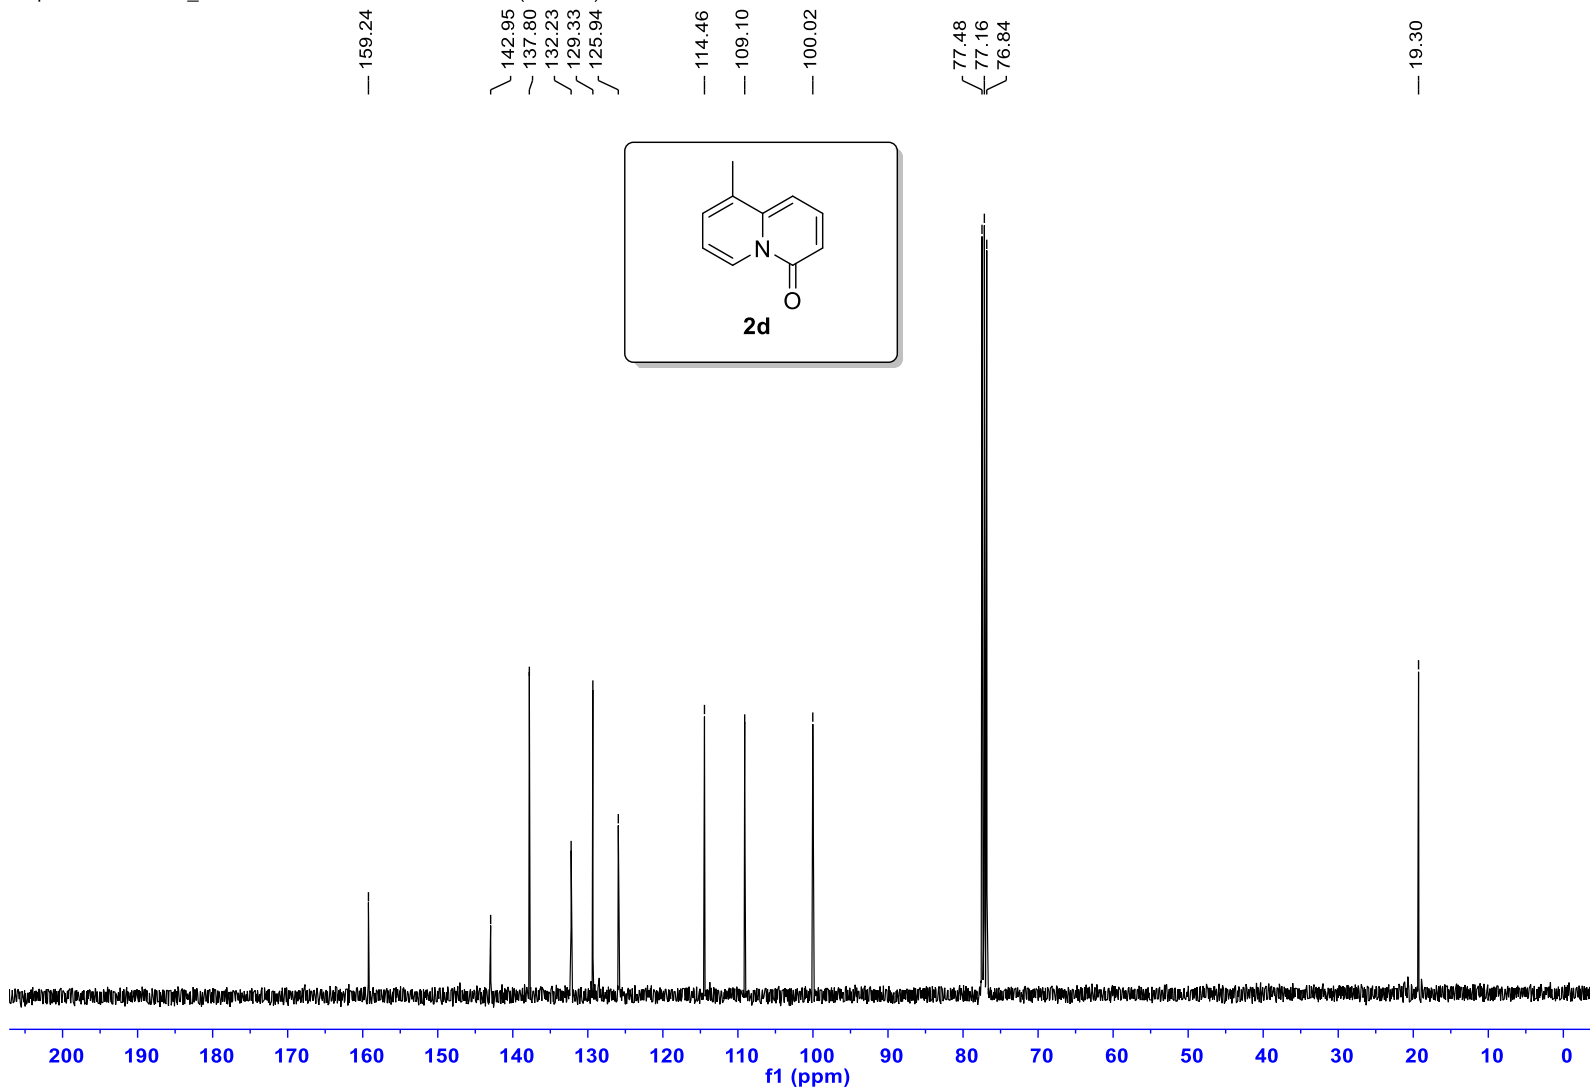

Jan04-2021-OSSO\_cJ.6.fid — XPC-X210104-1

8.6731  
8.6672  
7.6027  
7.5836  
7.5808  
7.5618  
7.4328  
7.4090  
7.2819  
7.1665  
7.1603  
7.1427  
7.1366  
6.6781  
6.6592  
6.6425  
6.6207

— 3.9373

— 0.0000

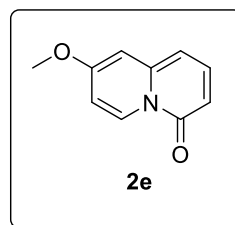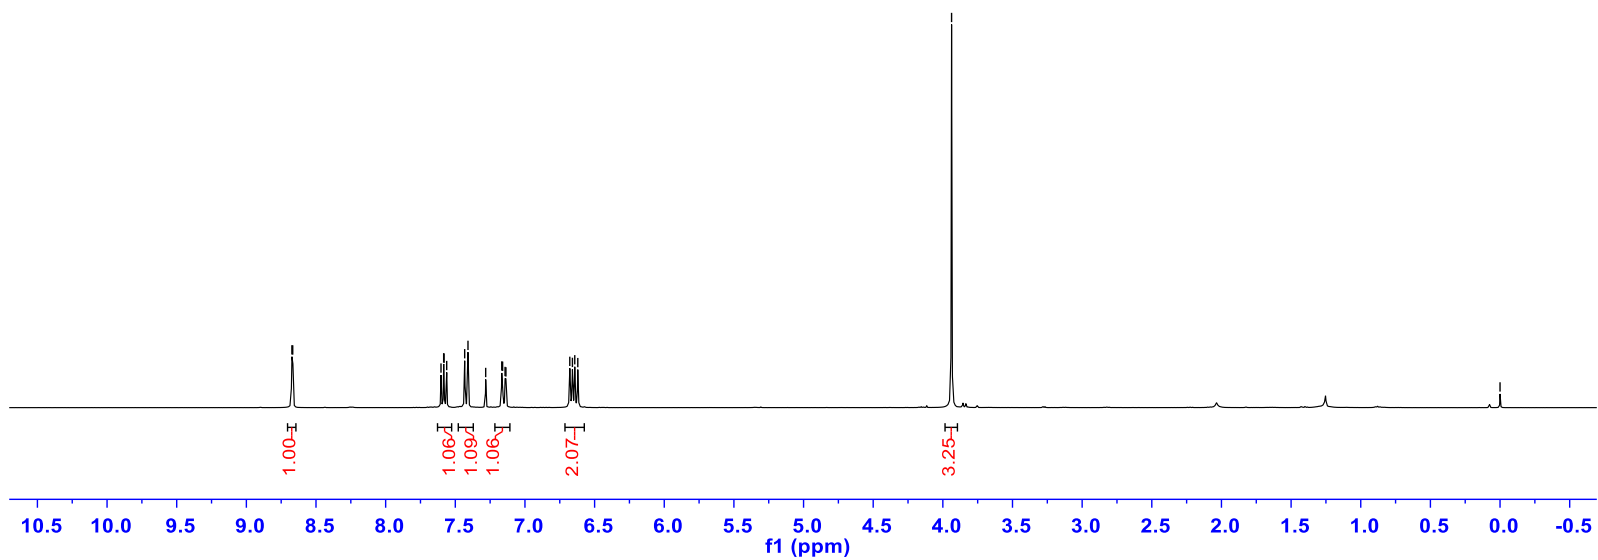

Jan04-2021-OSSO\_cJ.14.fid — XPC-X210104-1-C

— 158.2415

— 150.8655

— 139.5186

— 136.1153

— 126.1219

— 125.3828

— 108.7230

— 106.8455

— 103.7856

— 56.1465

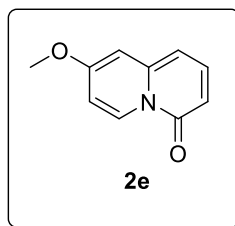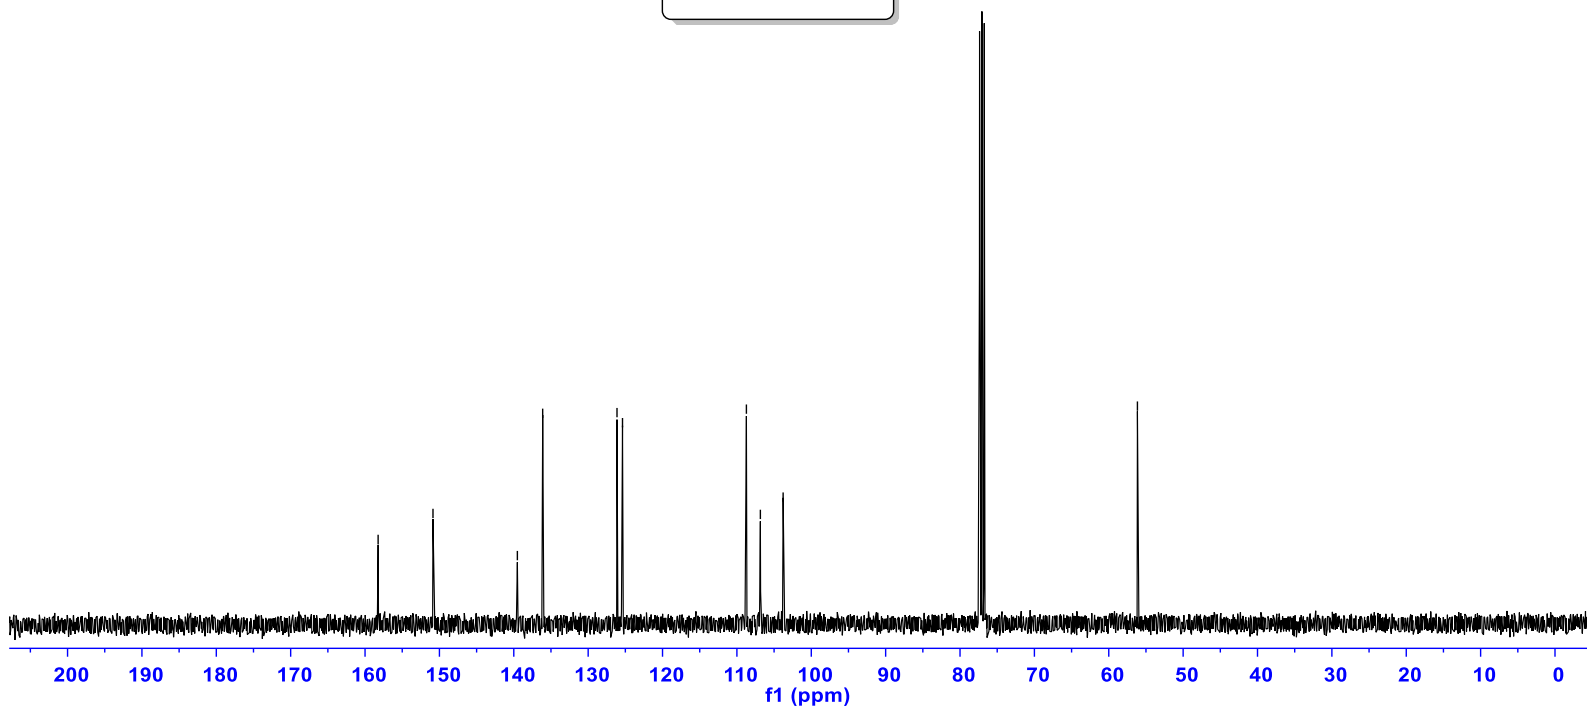



Dec22-2018-OSSO\_cJ.45.fid — XPC-X181213-7-HNMR(6Me-2b)

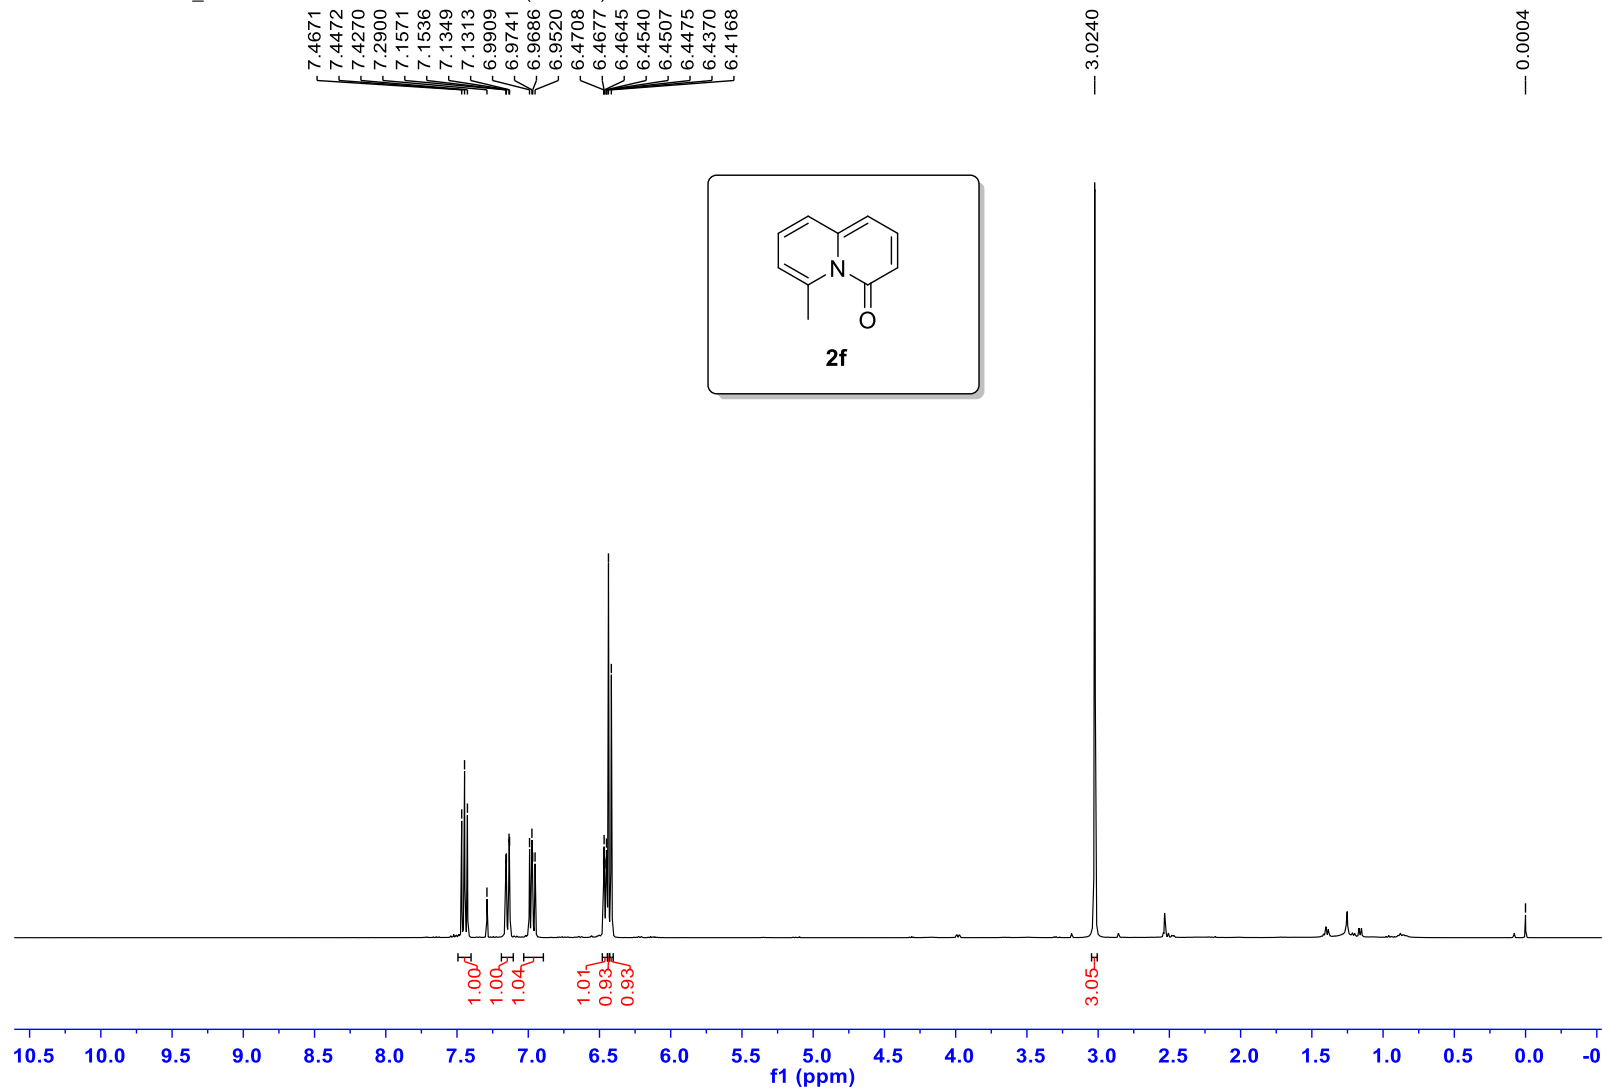

Dec24-2018-OSSO\_cJ.14.fid — XPC-X181213-7-CNMR

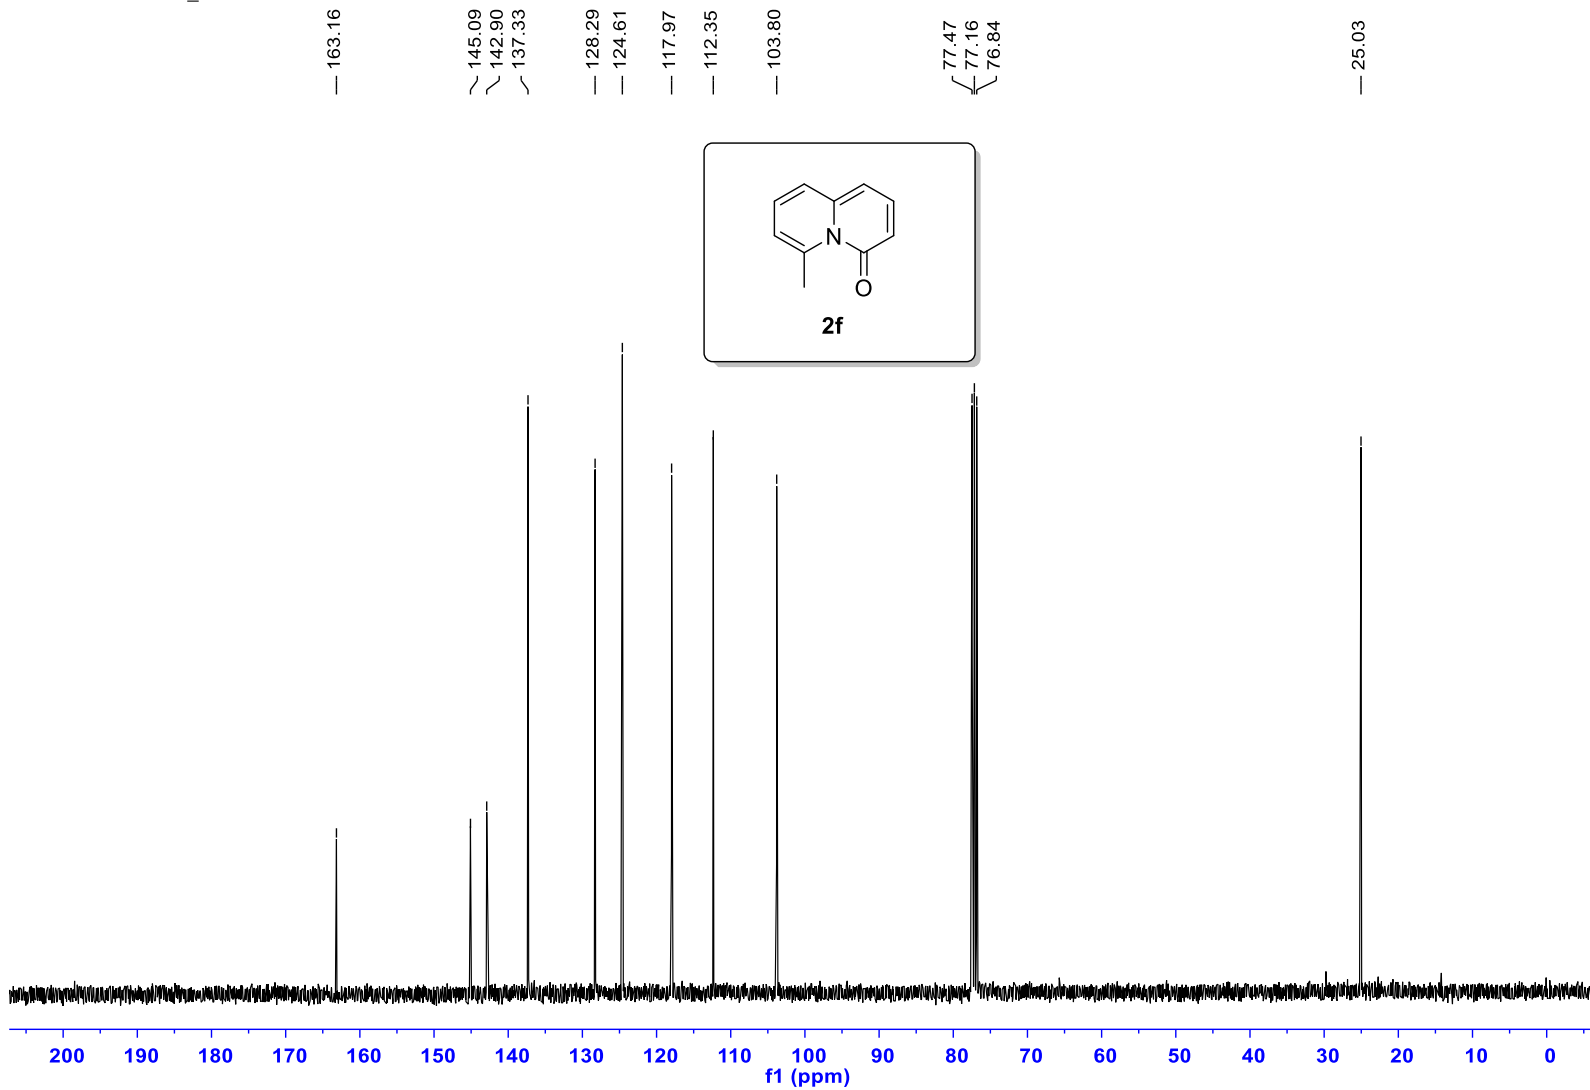

Dec10-2020-OSSO\_cJ.50.fid — XPC-X201210-1

7.6090  
7.5905  
7.5873  
7.5687  
7.3613  
7.3573  
7.3391  
7.3350  
7.1319  
7.1152  
7.1097  
7.0930  
6.7915  
6.7875  
6.7747  
6.7706  
6.6653  
6.6616  
6.6469  
6.6429  
6.6391  
6.6212  
6.6175  
5.0056  
4.9937  
4.9814  
4.9694  
4.9609  
4.9485  
4.9375

— -0.0000

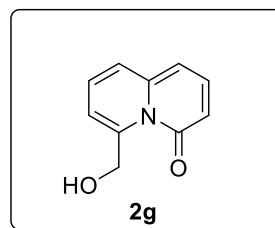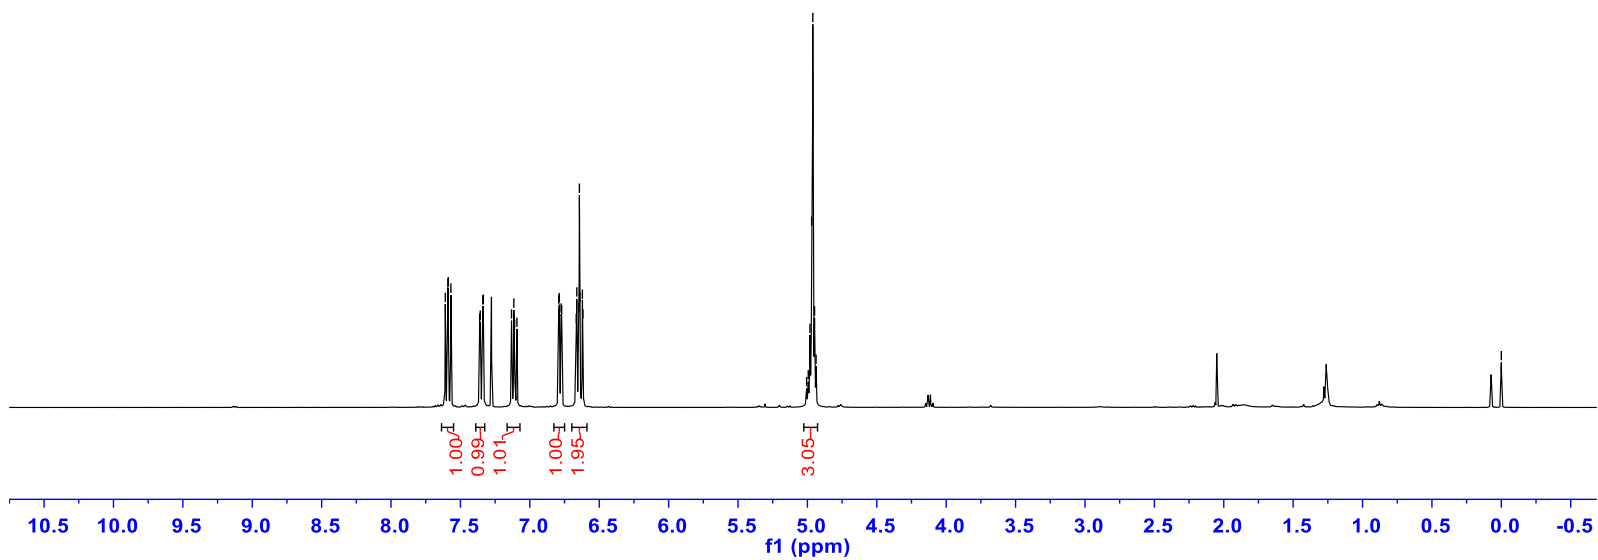

Dec11-2020-OSSO\_cJ.13.fid — XPC-X201211-1-C

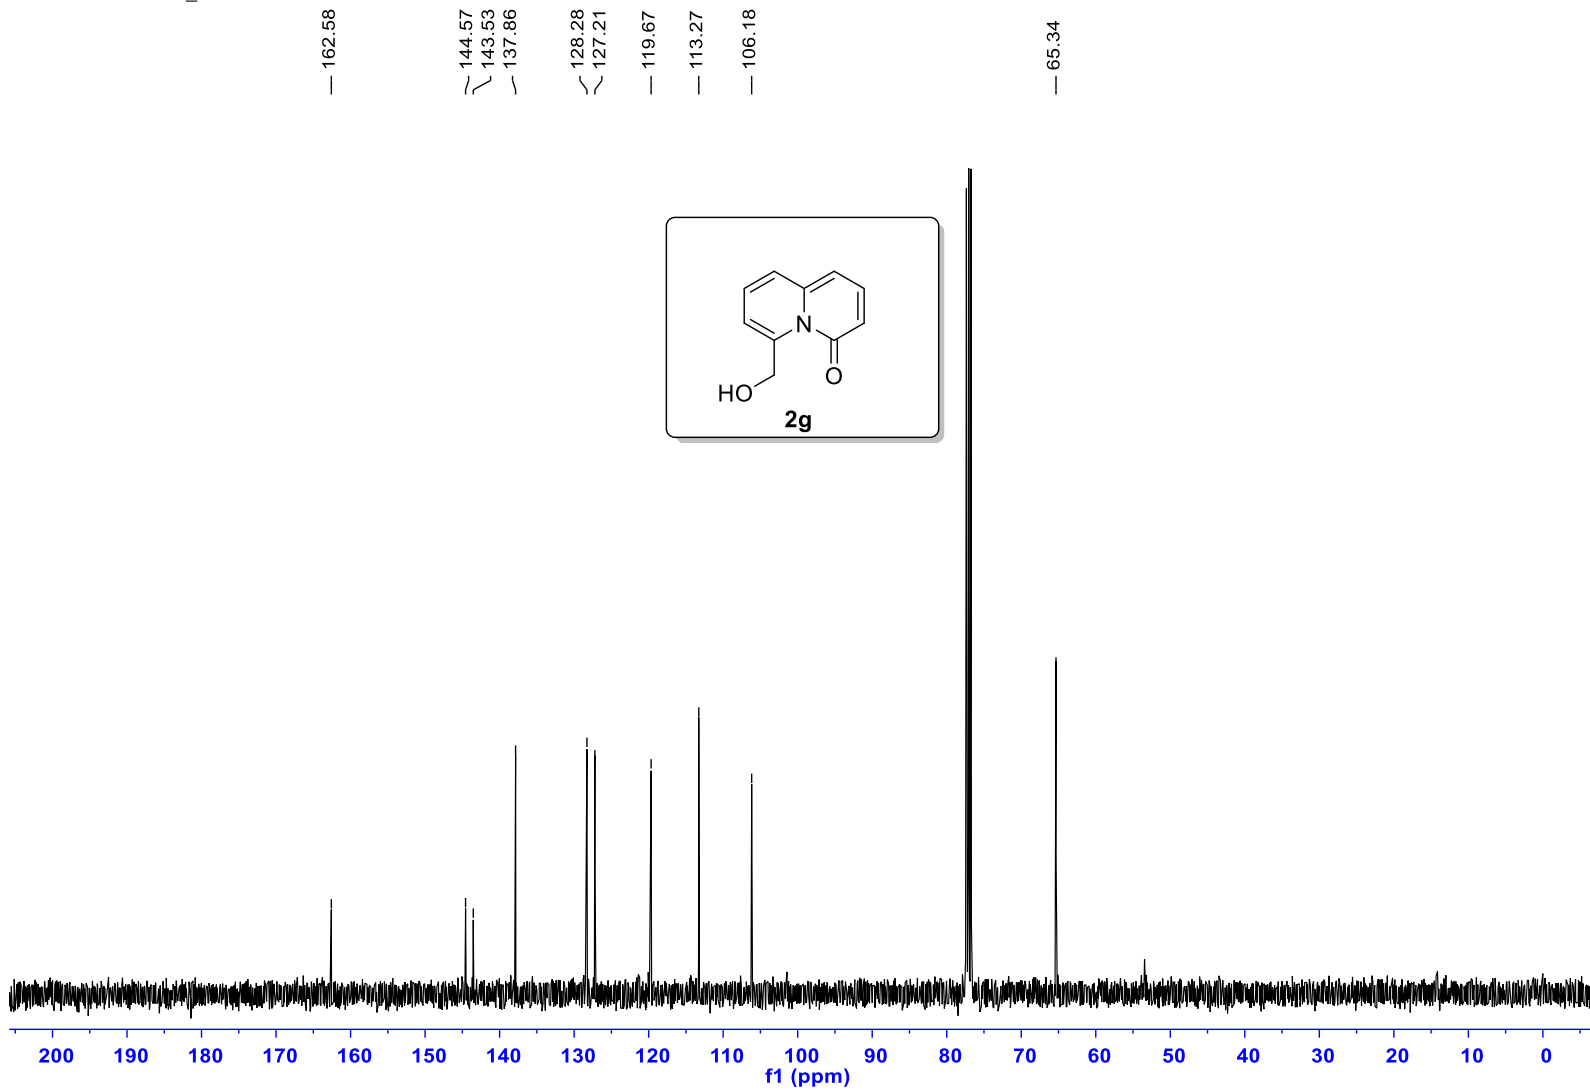

Feb02-2019-OSSO\_cJ.44.fid — XPC-X181213-6-HNMR(5F-2f)

9.0558  
9.0495  
9.0413  
9.0351  
7.6807  
7.6618  
7.6587  
7.6396  
7.5237  
7.5098  
7.4996  
7.4857  
7.2952  
7.2890  
7.2789  
7.2758  
7.2720  
7.2648  
7.2545  
7.2485  
6.7383  
6.7194  
6.6730  
6.6703  
6.6510  
6.6483

— -0.0000

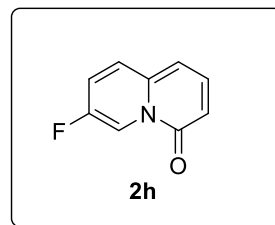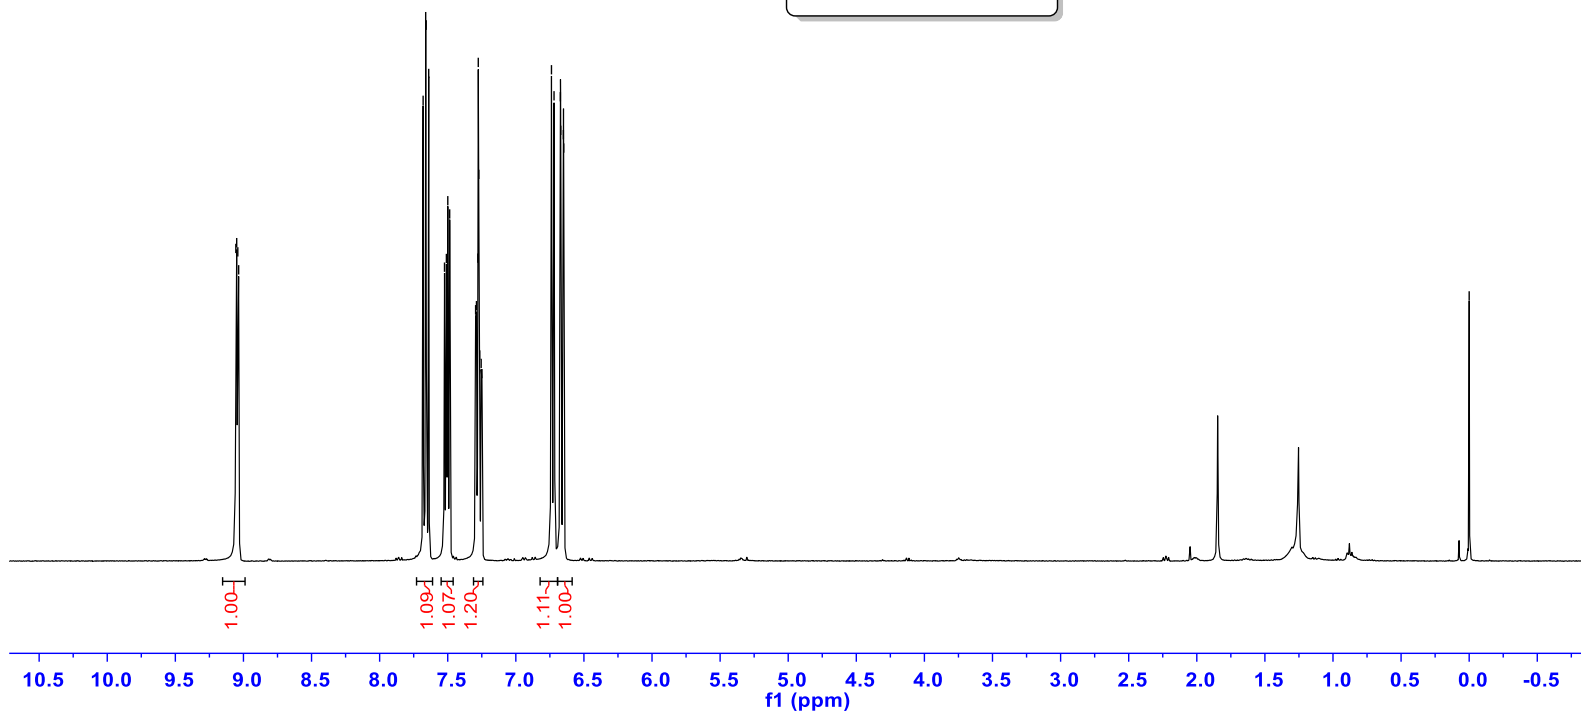

Dec13-2018-OSSO\_cJ.58.fid — XPC-X181213-5CNMR

— 158.76  
— 140.24  
— 138.59  
— 129.52  
— 128.89  
— 126.57  
— 113.32  
— 110.80  
— 100.97  
— 77.47  
— 77.16  
— 76.84

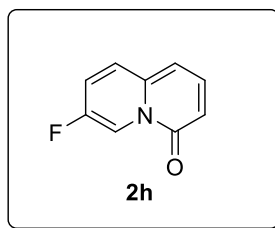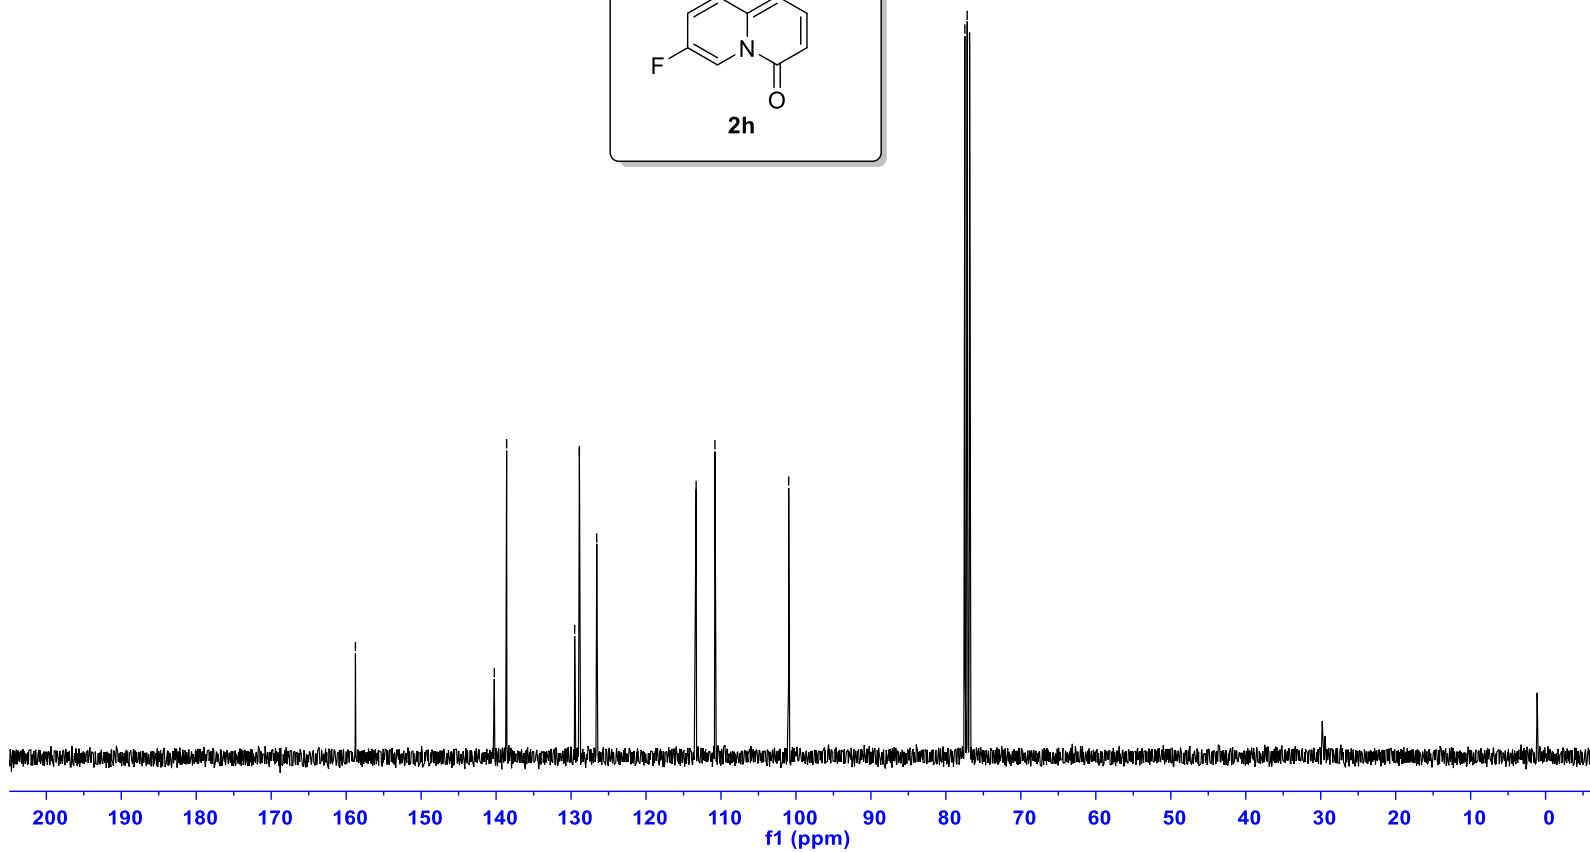

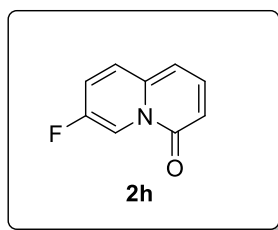

— -133.71

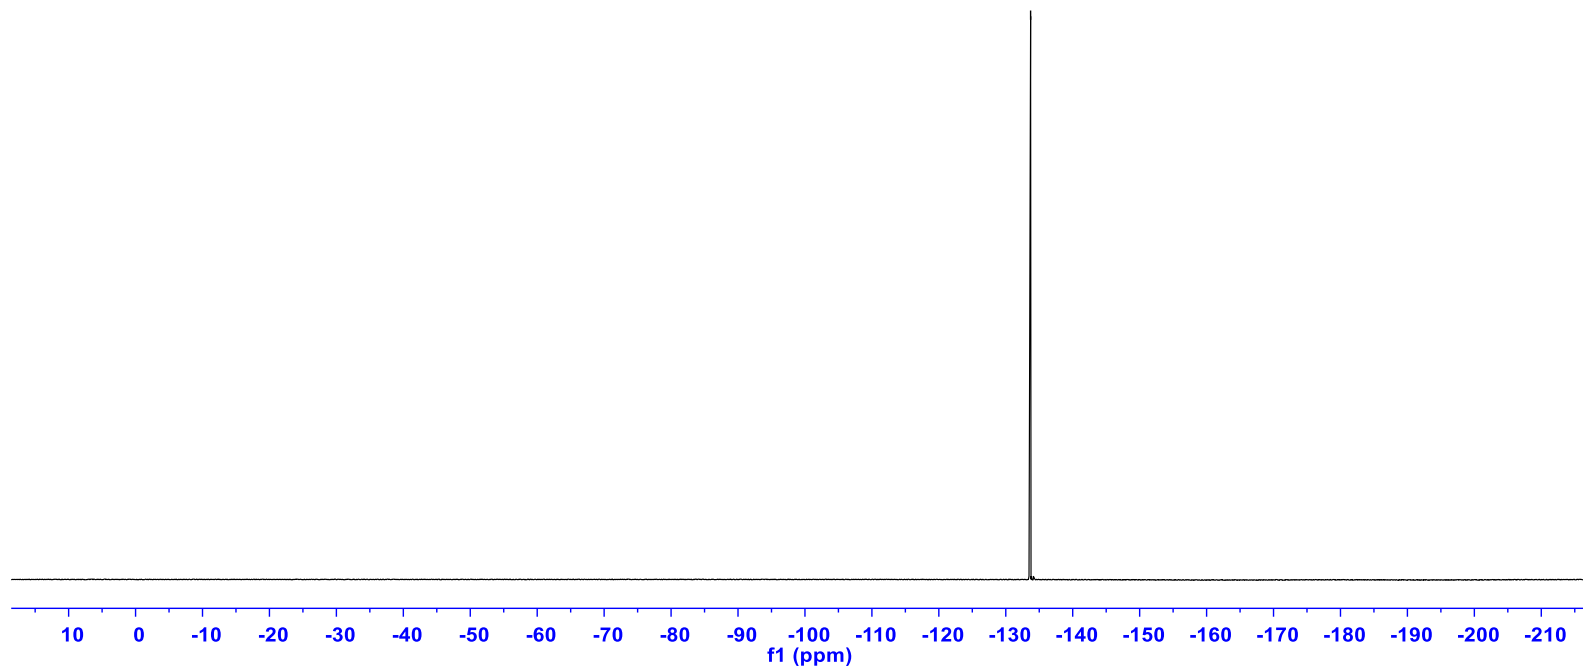

Feb01-2018-OSSO-CJ.33.fid — XPC-X180201-3-HNMR

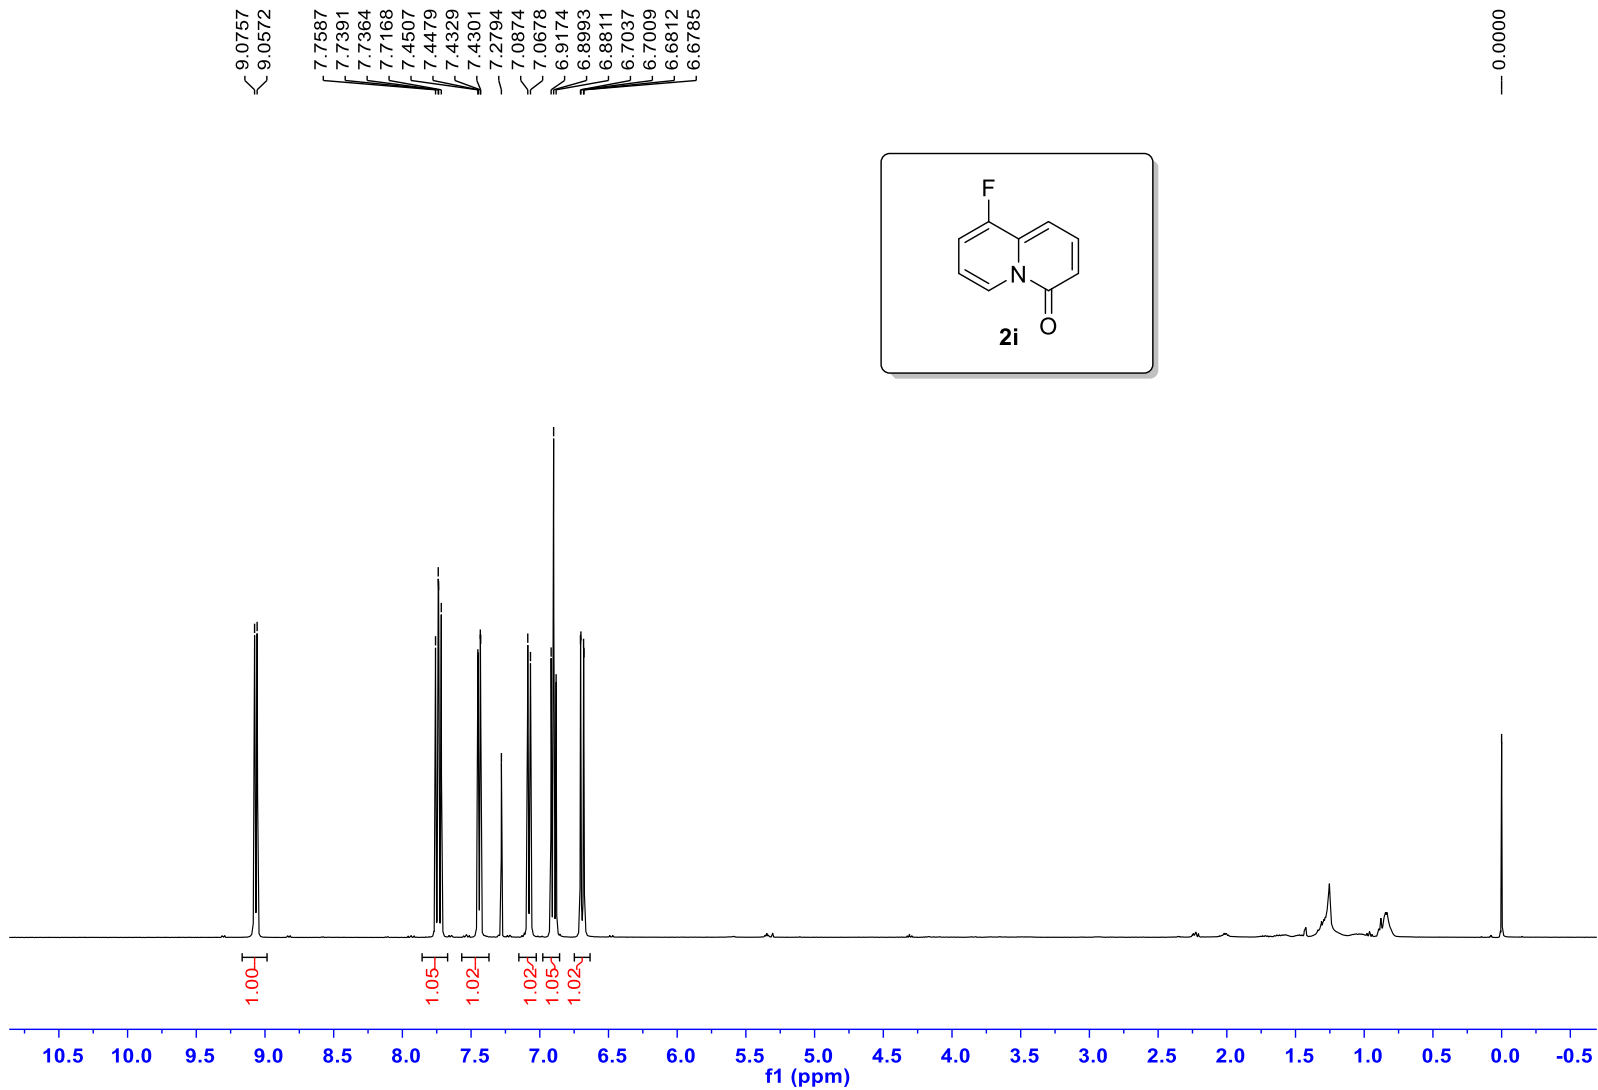



Feb01-2018-OSSO-CJ.34.fid — XPC-X180201-3-CNMR

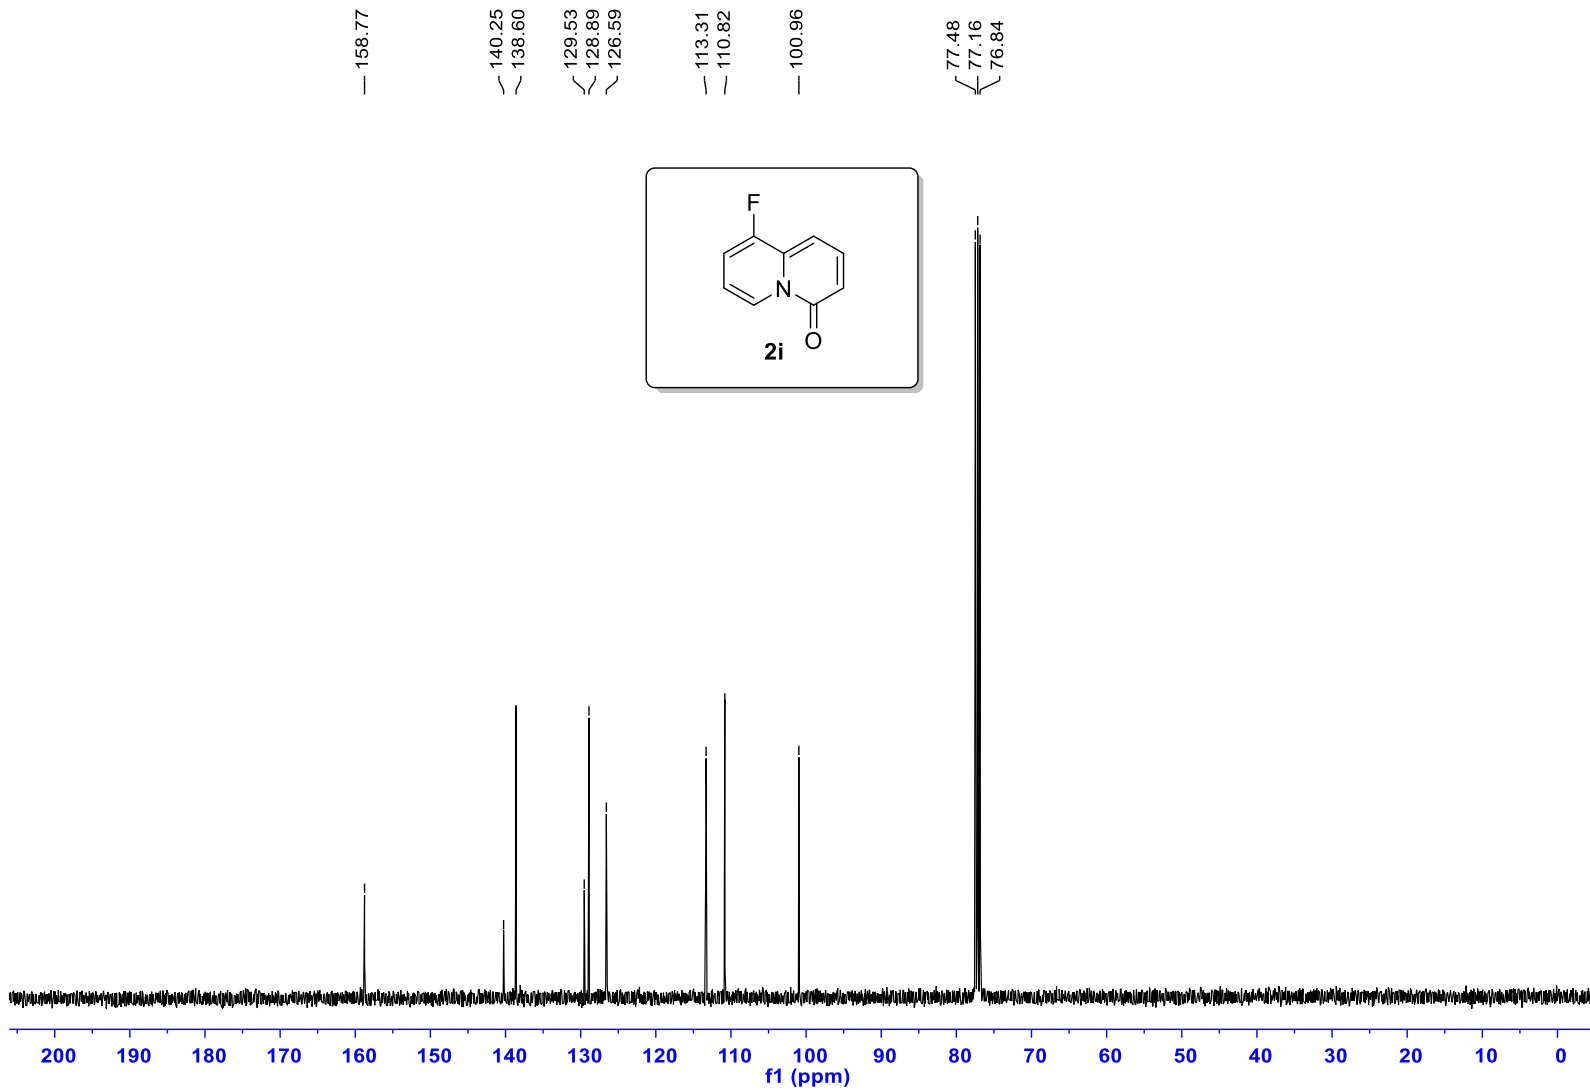

— -122.79

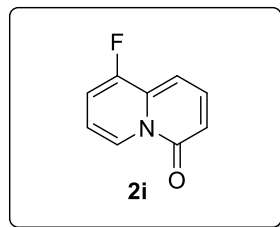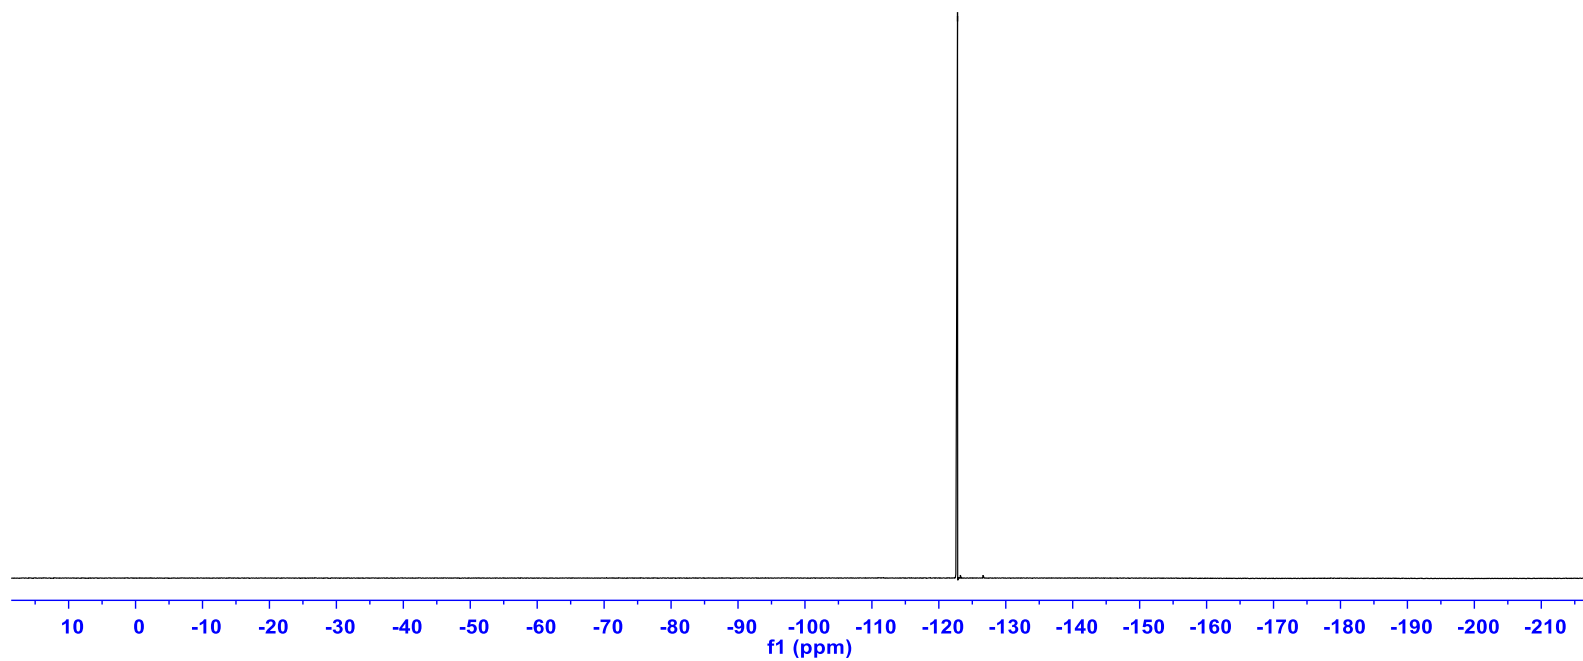

Dec13-2018-OSSO\_cJ.48.fid — XPC-X181213-9HNMR

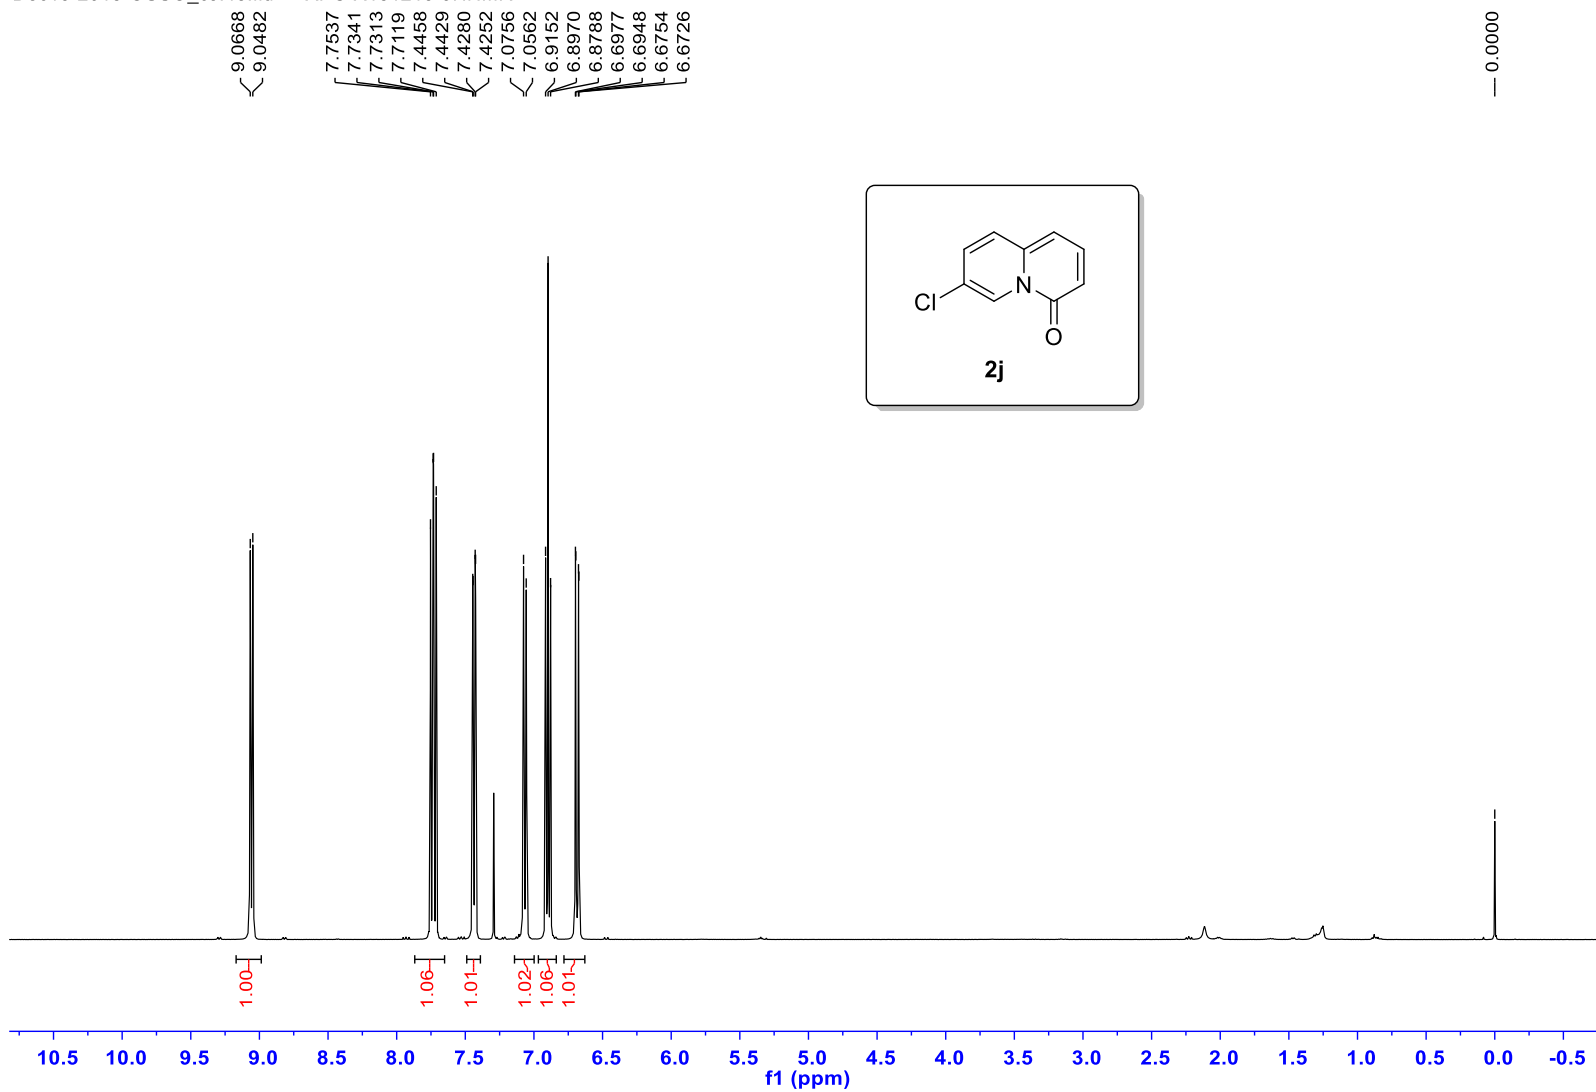

Dec13-2018-OSSO\_cJ.49.fid — XPC-X181213-9CNMR

— 158.70

— 140.19  
— 138.55

— 129.47  
— 128.86  
— 126.52

— 113.28  
— 110.75

— 100.91

— 77.48  
— 77.16  
— 76.84

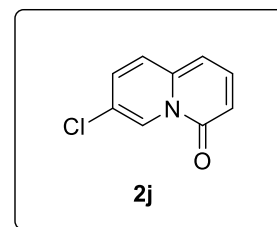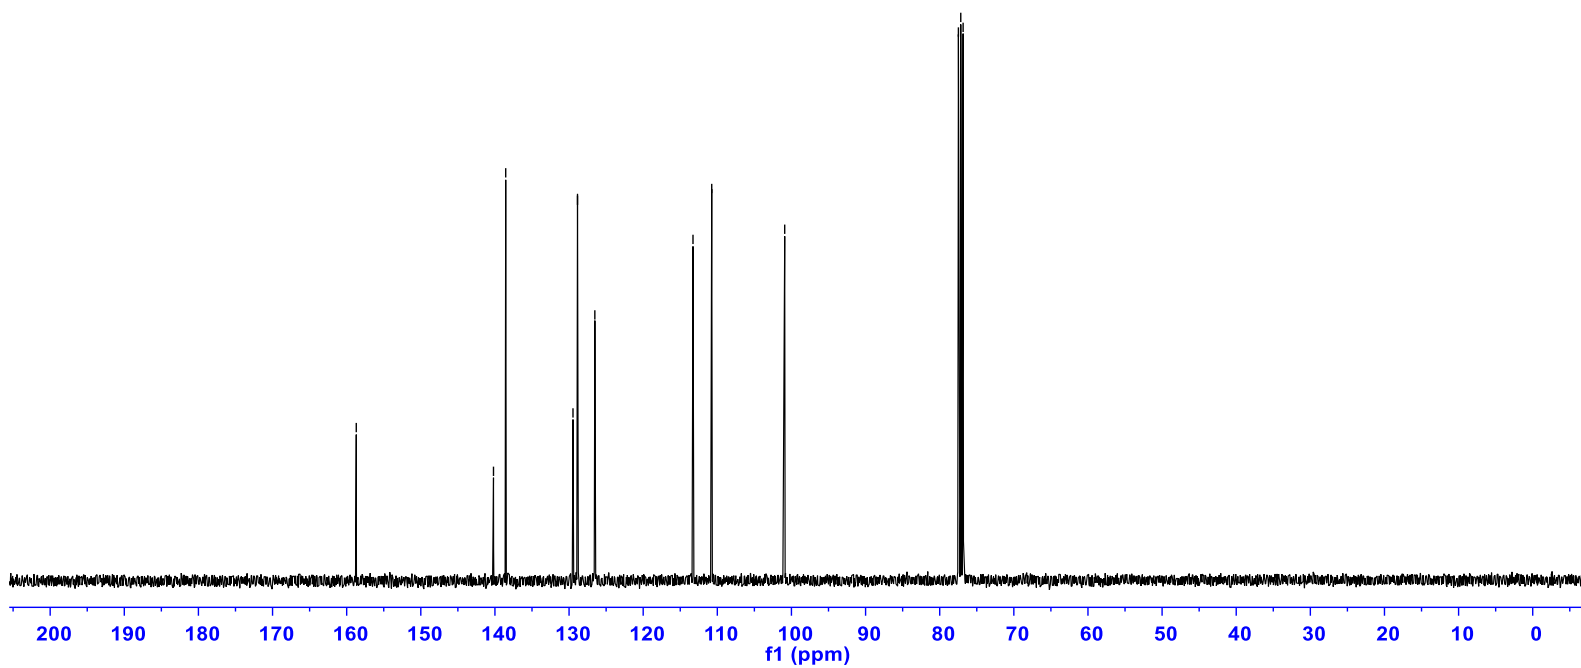

Oct03-2018-OSSO\_cJ.24.fid — XPC-X180110-2-HNMR

9.0650  
9.0622  
9.0594  
9.0464  
9.0437  
9.0409  
7.7507  
7.7310  
7.7283  
7.7088  
7.4429  
7.4401  
7.4250  
7.4222  
7.2995  
7.0705  
7.0508  
6.9131  
6.8949  
6.8766  
6.6948  
6.6919  
6.6724  
6.6696

— 0.0003

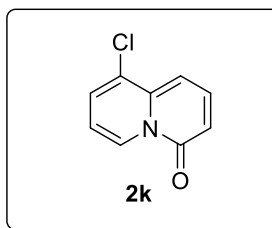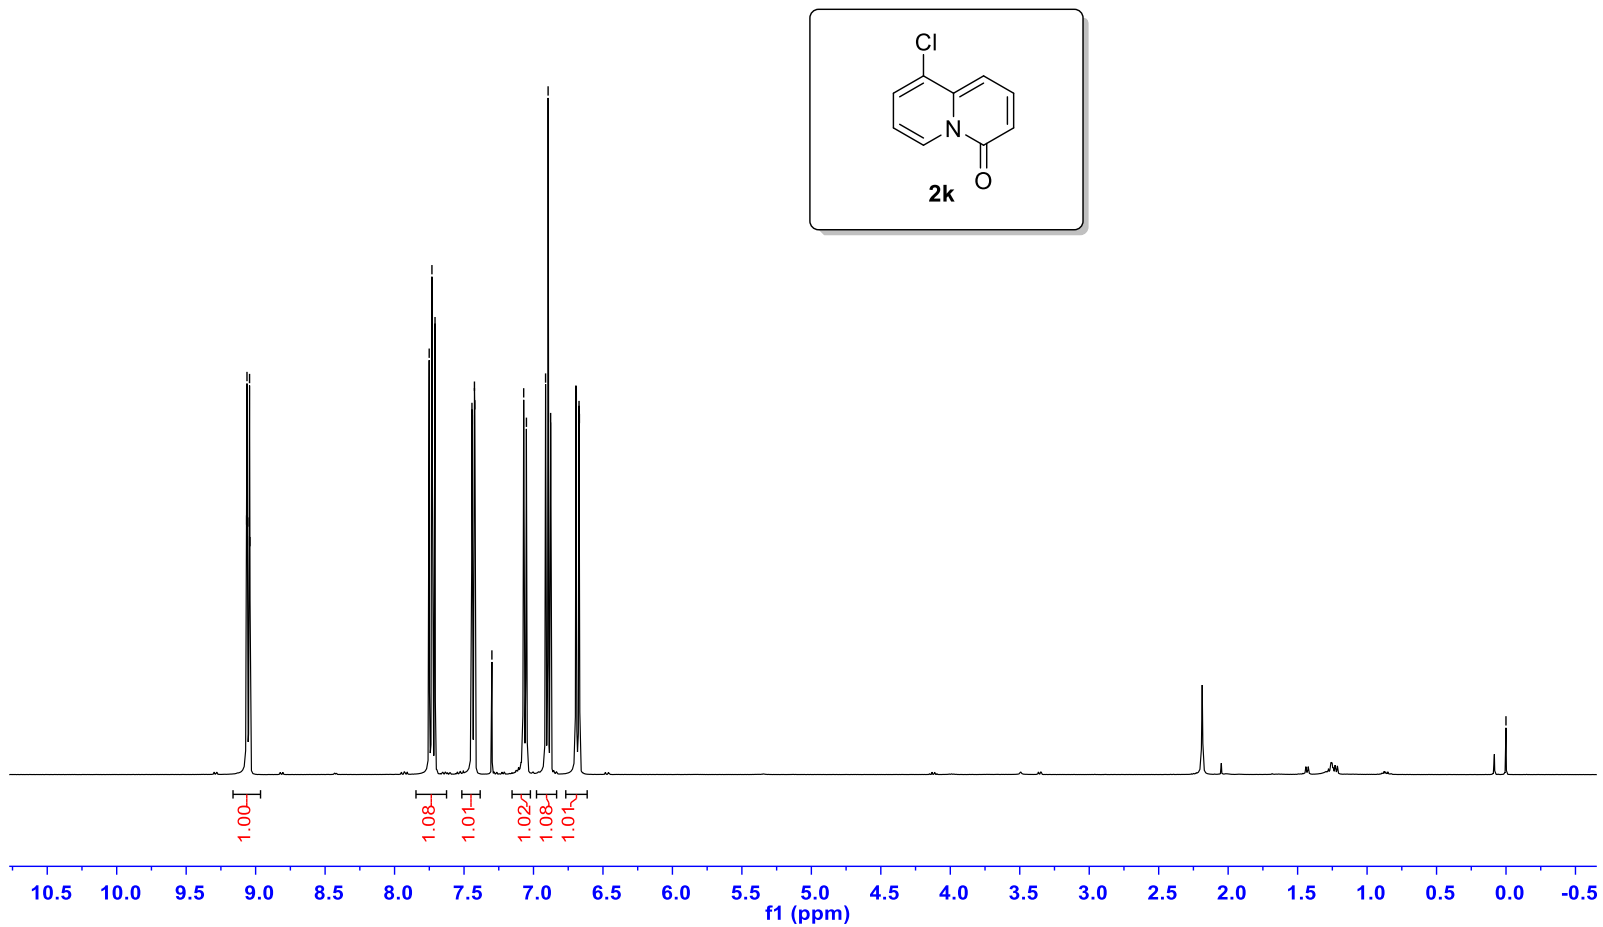

Oct03-2018-OSSO\_cJ.25.fid — XPC-X180110-2-CNMR

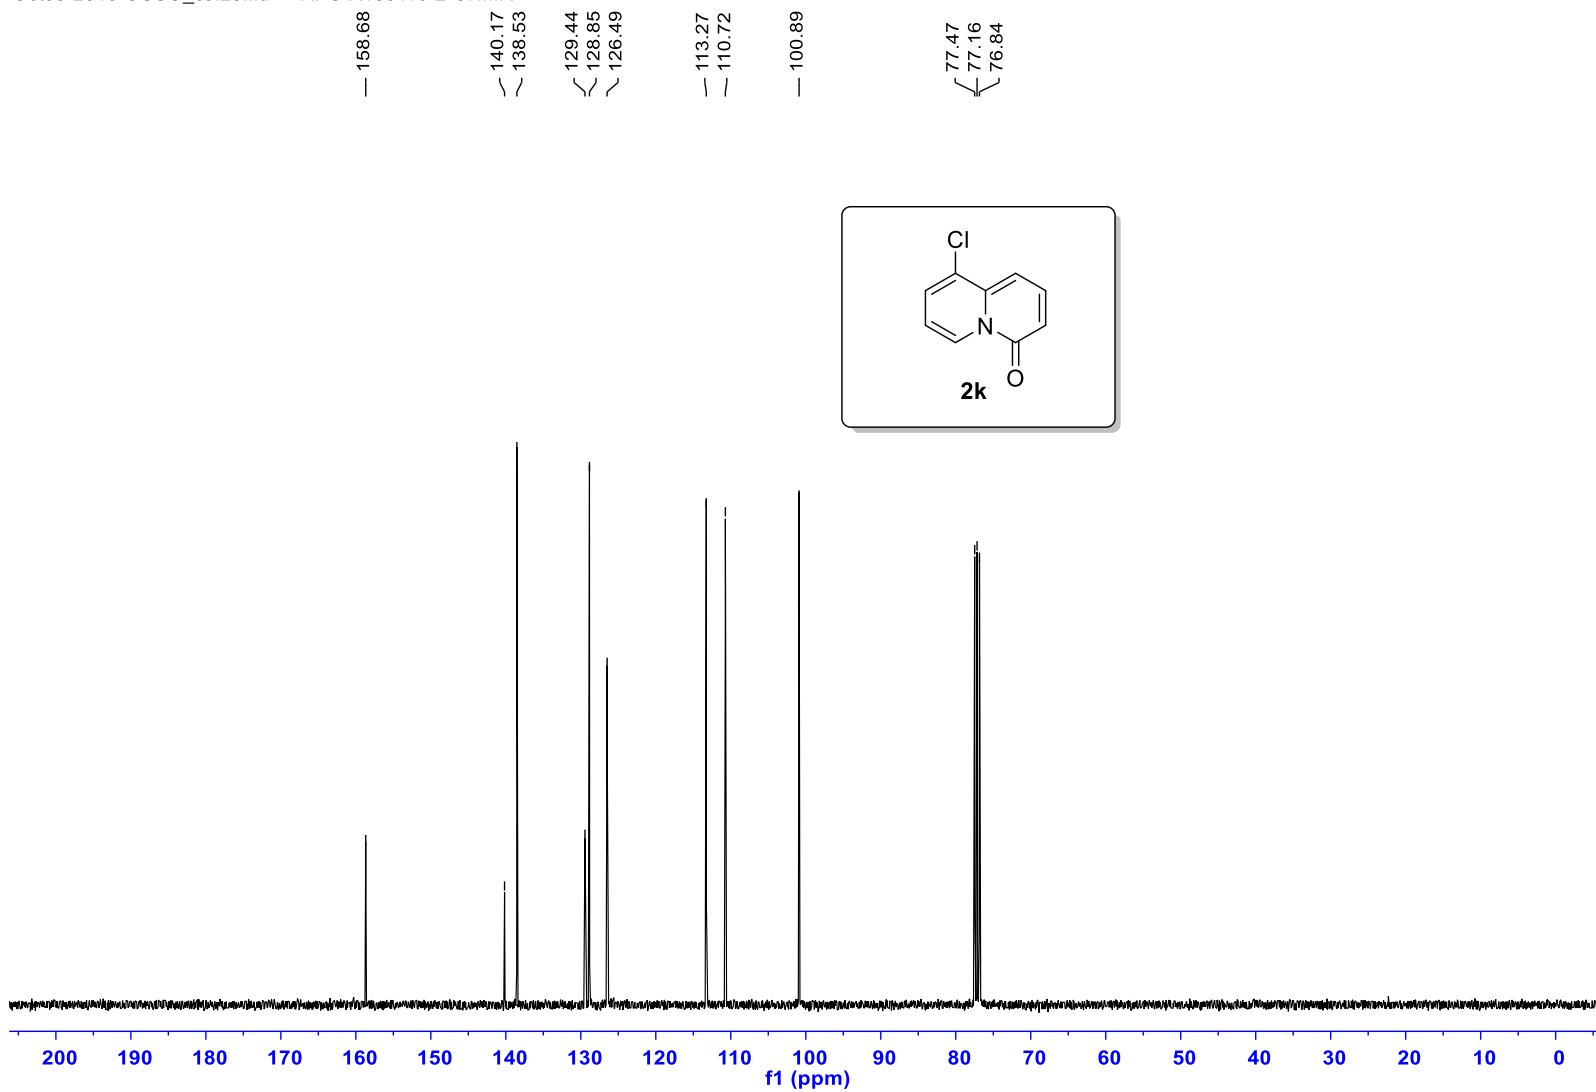

xpc-x20015-CF3.1.fid

9.3559  
9.3524  
9.3492

7.6891  
7.6741  
7.6710  
7.6560  
7.4742  
7.4558  
7.2930  
7.2895  
7.2745  
7.2708  
7.2117  
6.6699  
6.6676  
6.6519  
6.6494  
6.6454  
6.6308

-0.0603

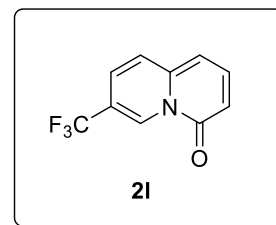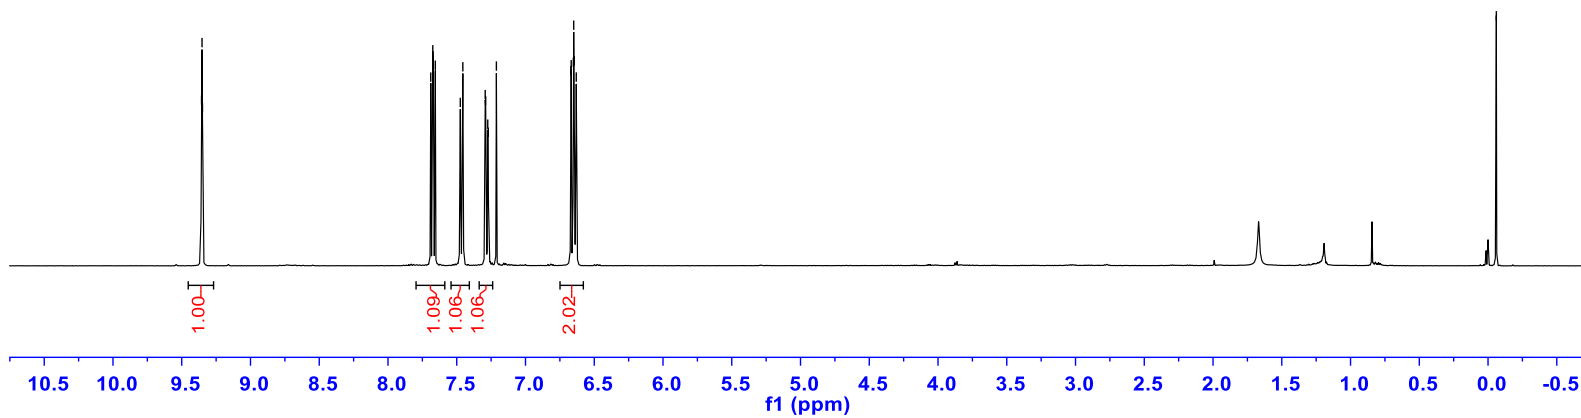

xpc-x20015-CF3.2.fid —

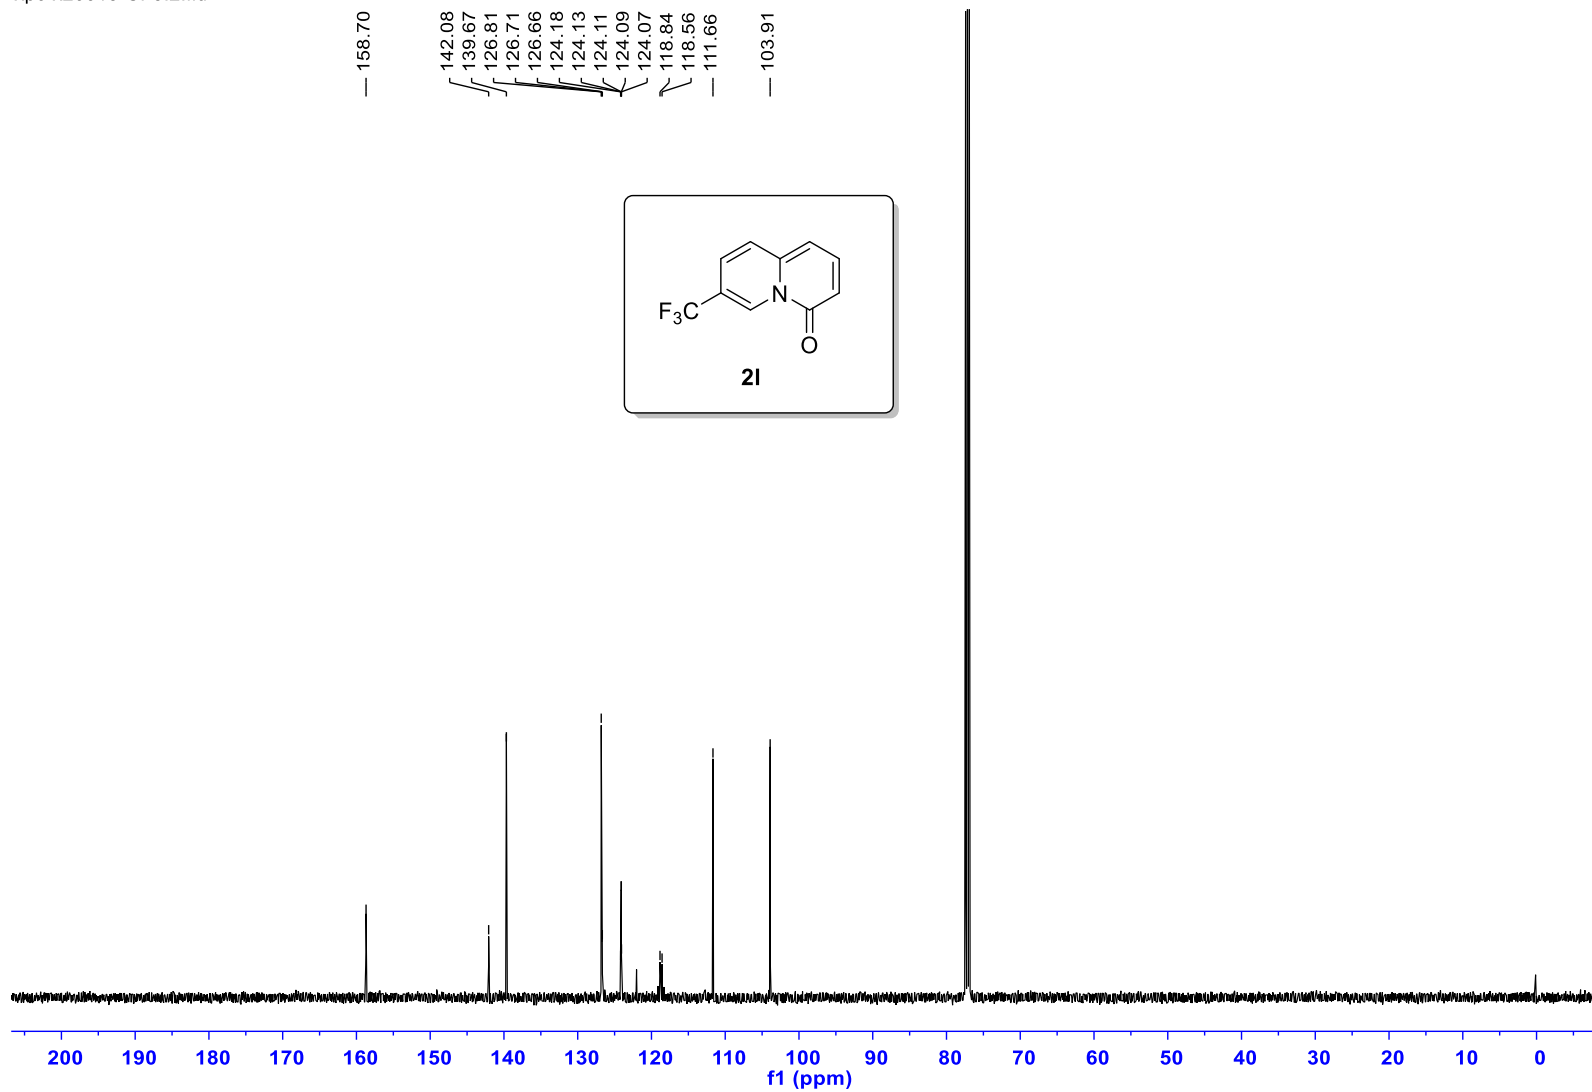



xpc-x20015-CF3.3.fid —

— 63.65

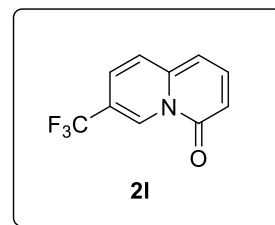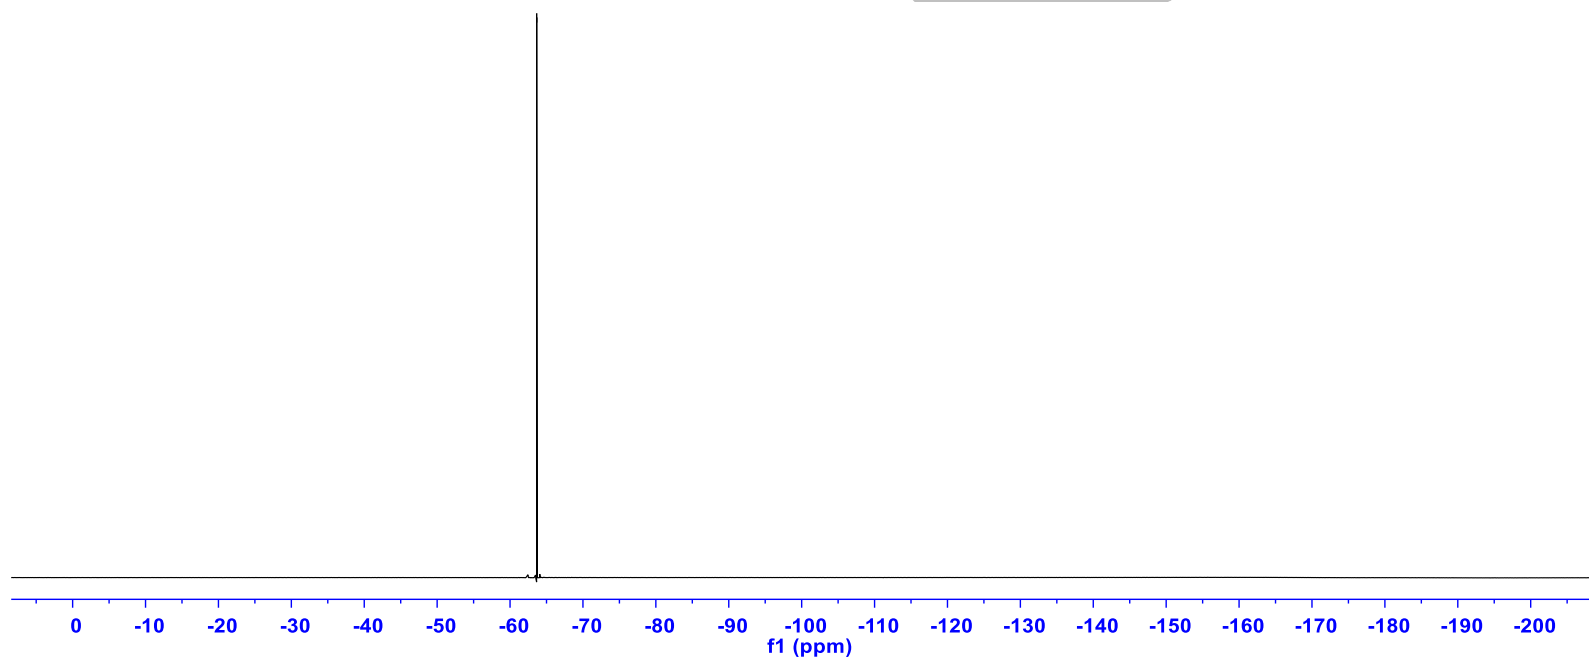

Sep29-2018-OSSO\_cJ.23.fid — XPC-X181213-8-HNMR

8.8840  
8.8808  
8.6918  
8.6893  
8.6868  
8.6790  
8.6765  
8.6740  
7.9059  
7.8931  
7.8225  
7.8038  
7.8003  
7.7815  
7.2869  
6.8957  
6.8925  
6.8881  
6.8704

0.0000

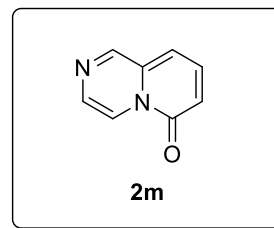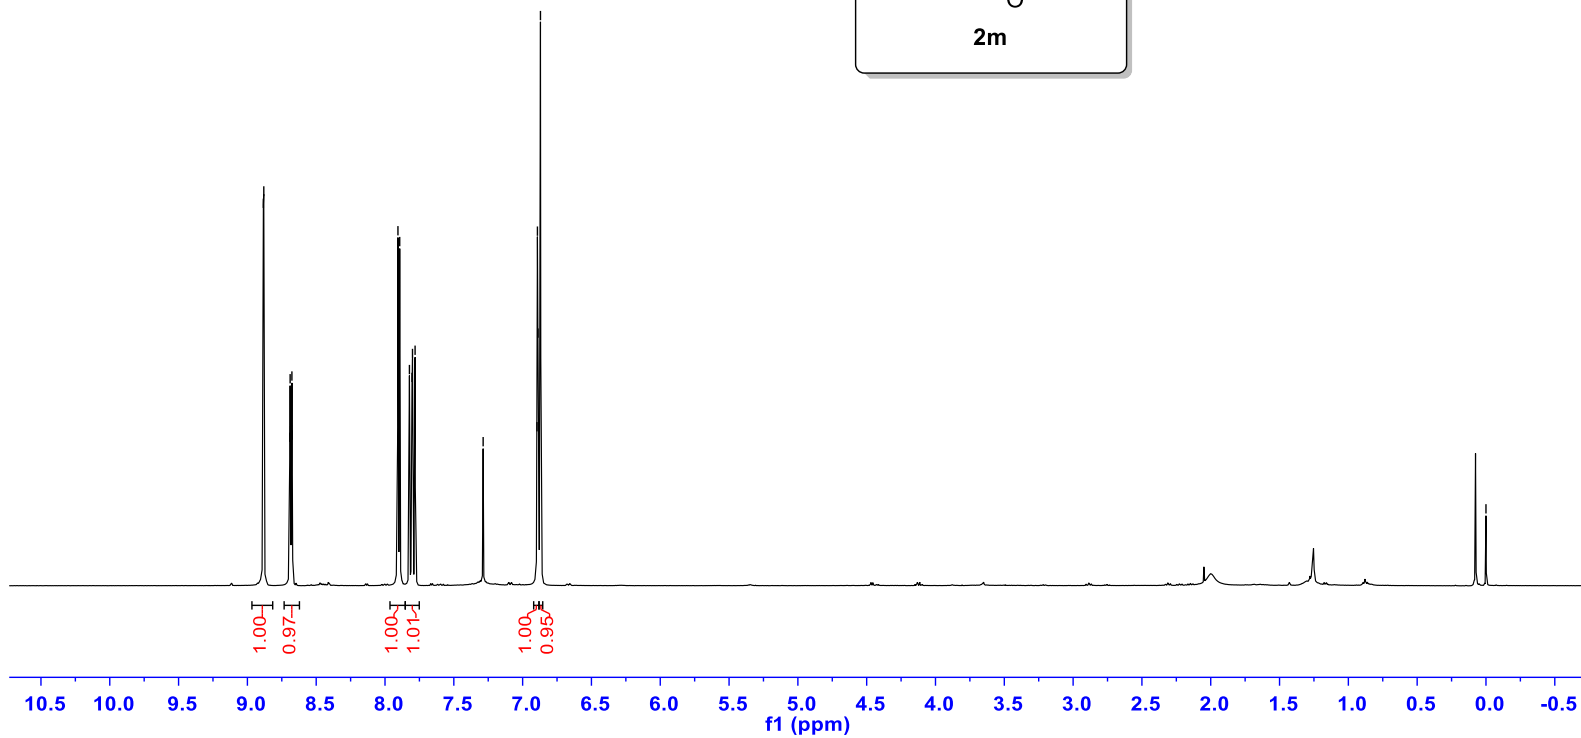

Sep29-2018-OSSO\_cJ.24.fid — XPC-X181213-8-CNMR

— 157.37 — 152.46 — 138.82 — 135.61 — 130.91 — 117.23 — 115.96 — 104.99 — 77.47 — 77.16 — 76.84

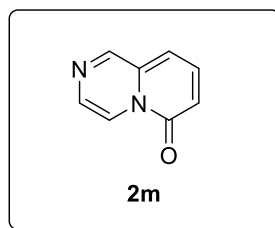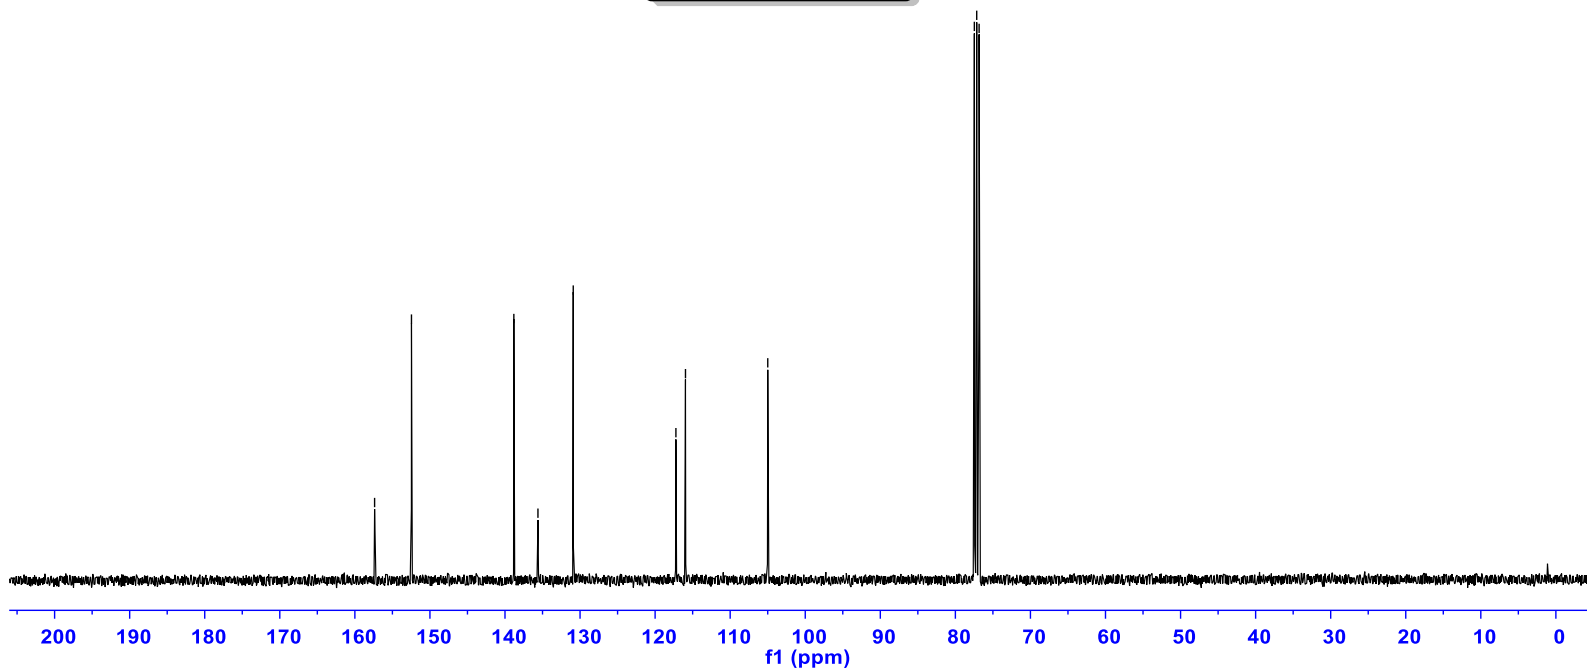

Nov13-2019-OSSO\_cj.8.fid — XPC-X181217-1-HNMR (溶剂-甲基2n)

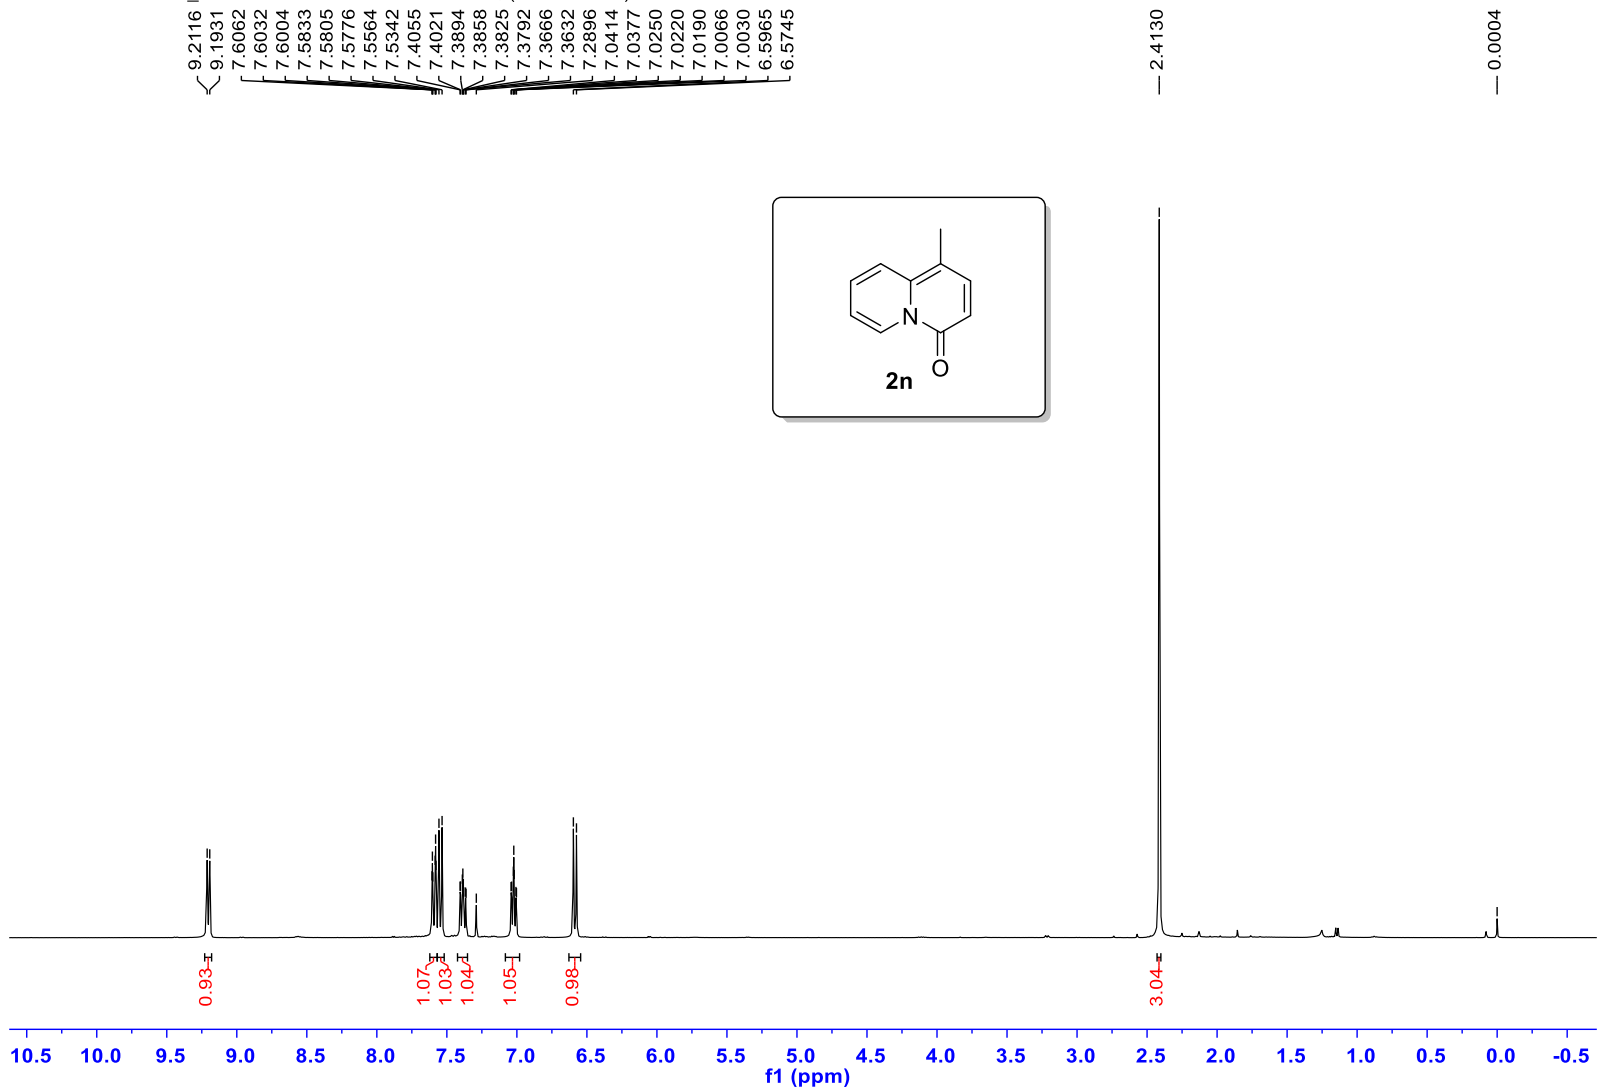

Nov17-2019-OSSO\_cJ.13.fid — XPC-X181217-1-CNMR (苯链-甲基-2n)

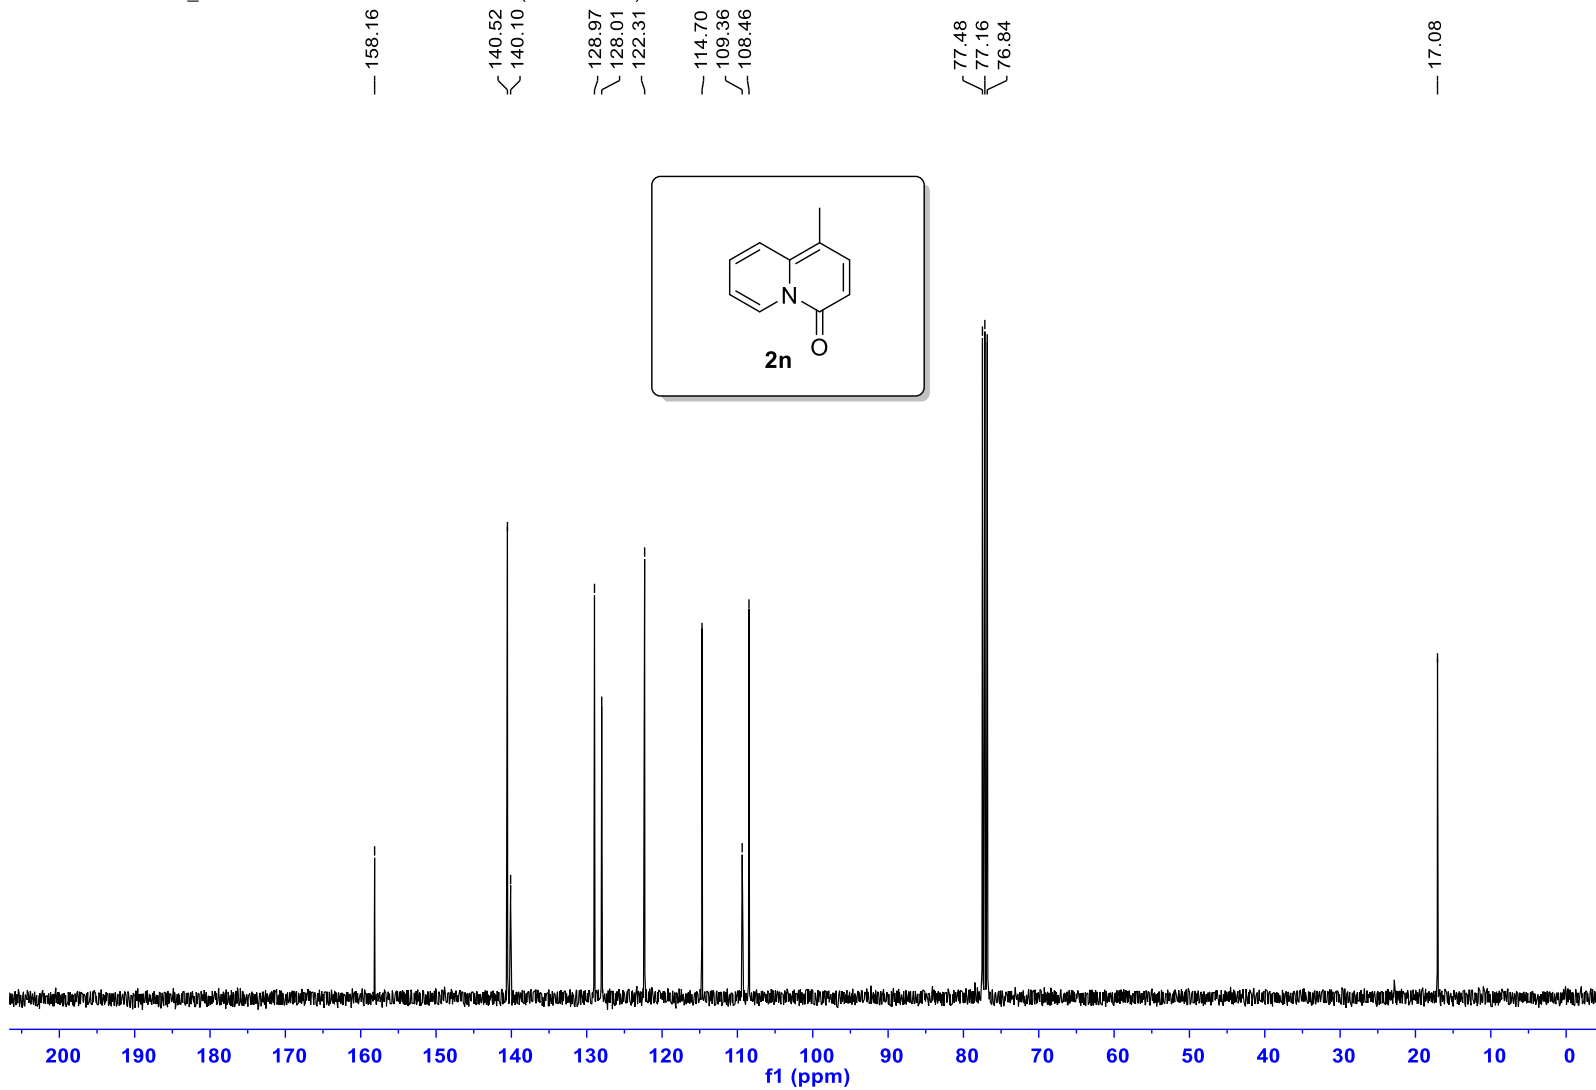

Sep29-2018-OSSO\_cJ.25.fid — XPC-X181217-2-HNMR

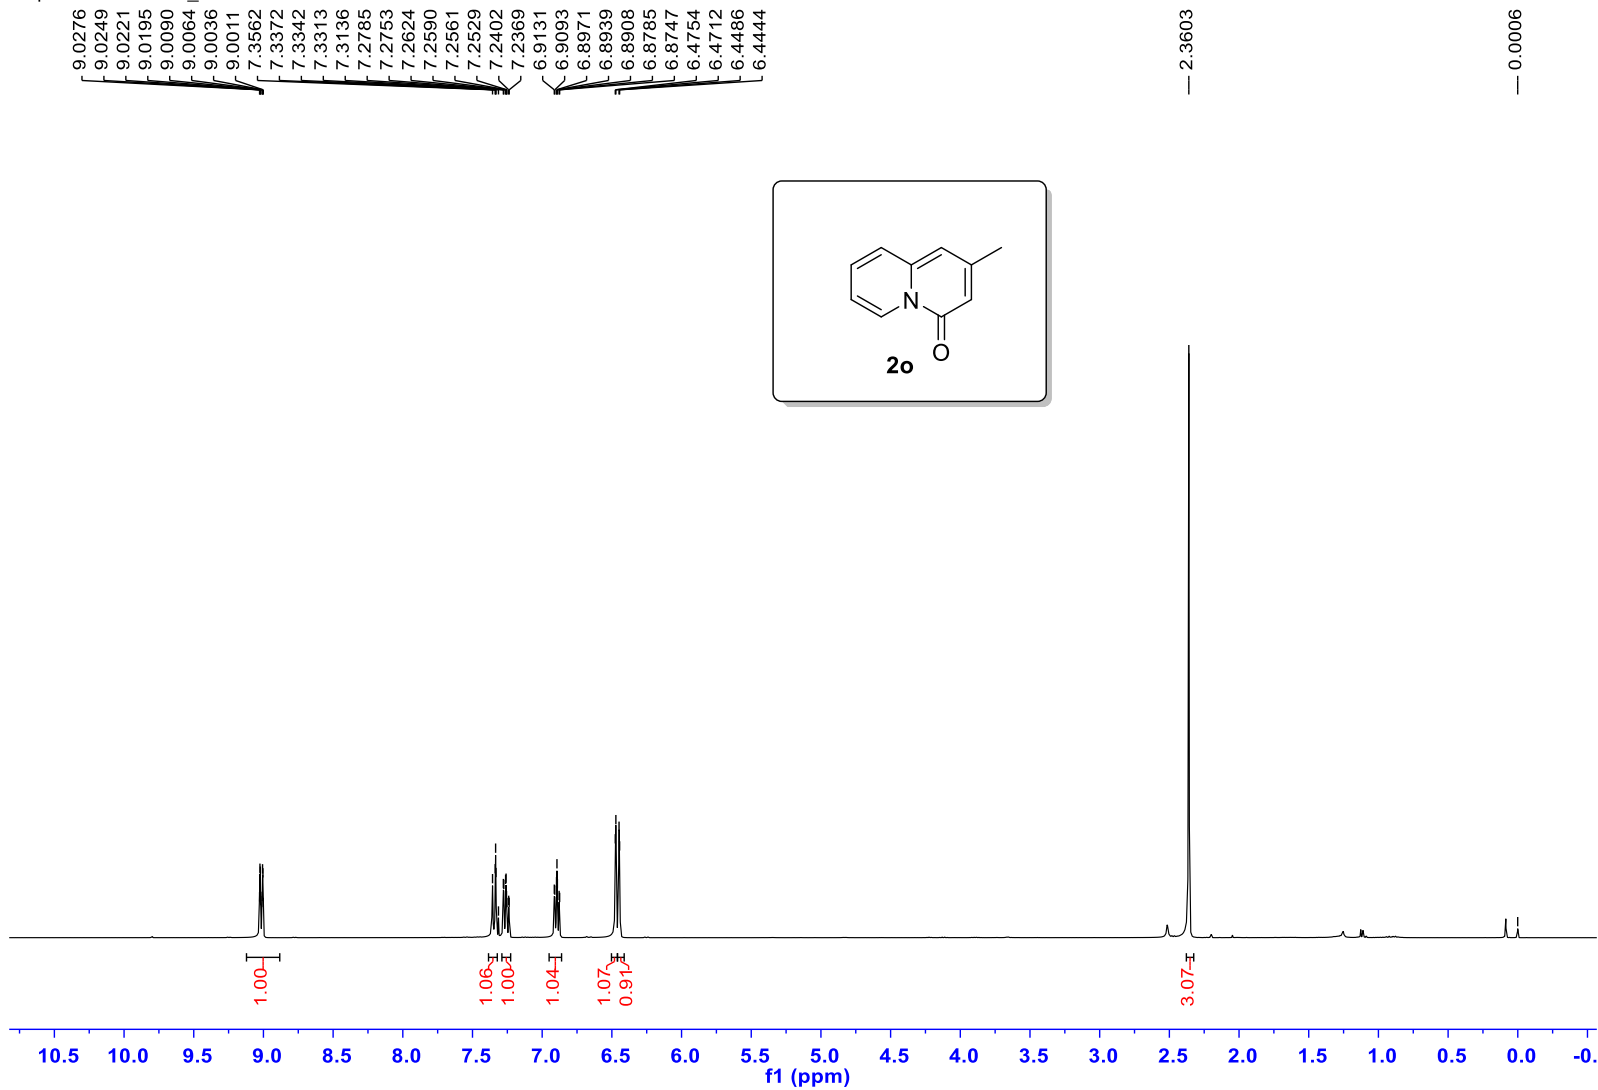

Sep29-2018-OSSO\_cJ.26.fid — XPC-X181217-2-CNMR

— 158.37

— 149.89

— 141.70

— 129.25

— 127.03

— 124.82

— 114.20

— 109.29

— 104.70

— 77.48

— 77.16

— 76.84

— 21.85

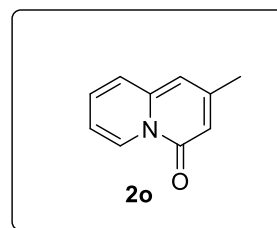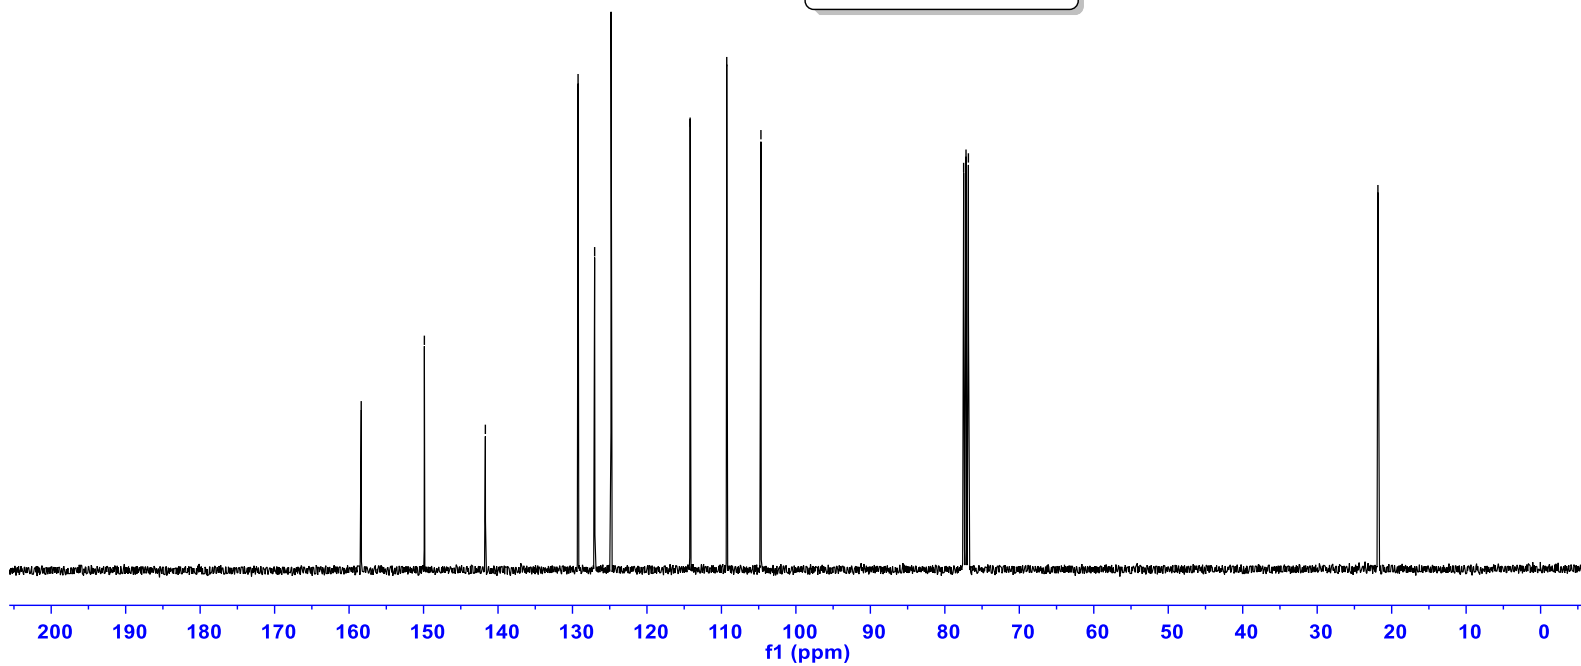

Nov19-2019-OSSO\_cj.26.fid — XPC-X181217-3-HNMR (峰2-正戊基2p)

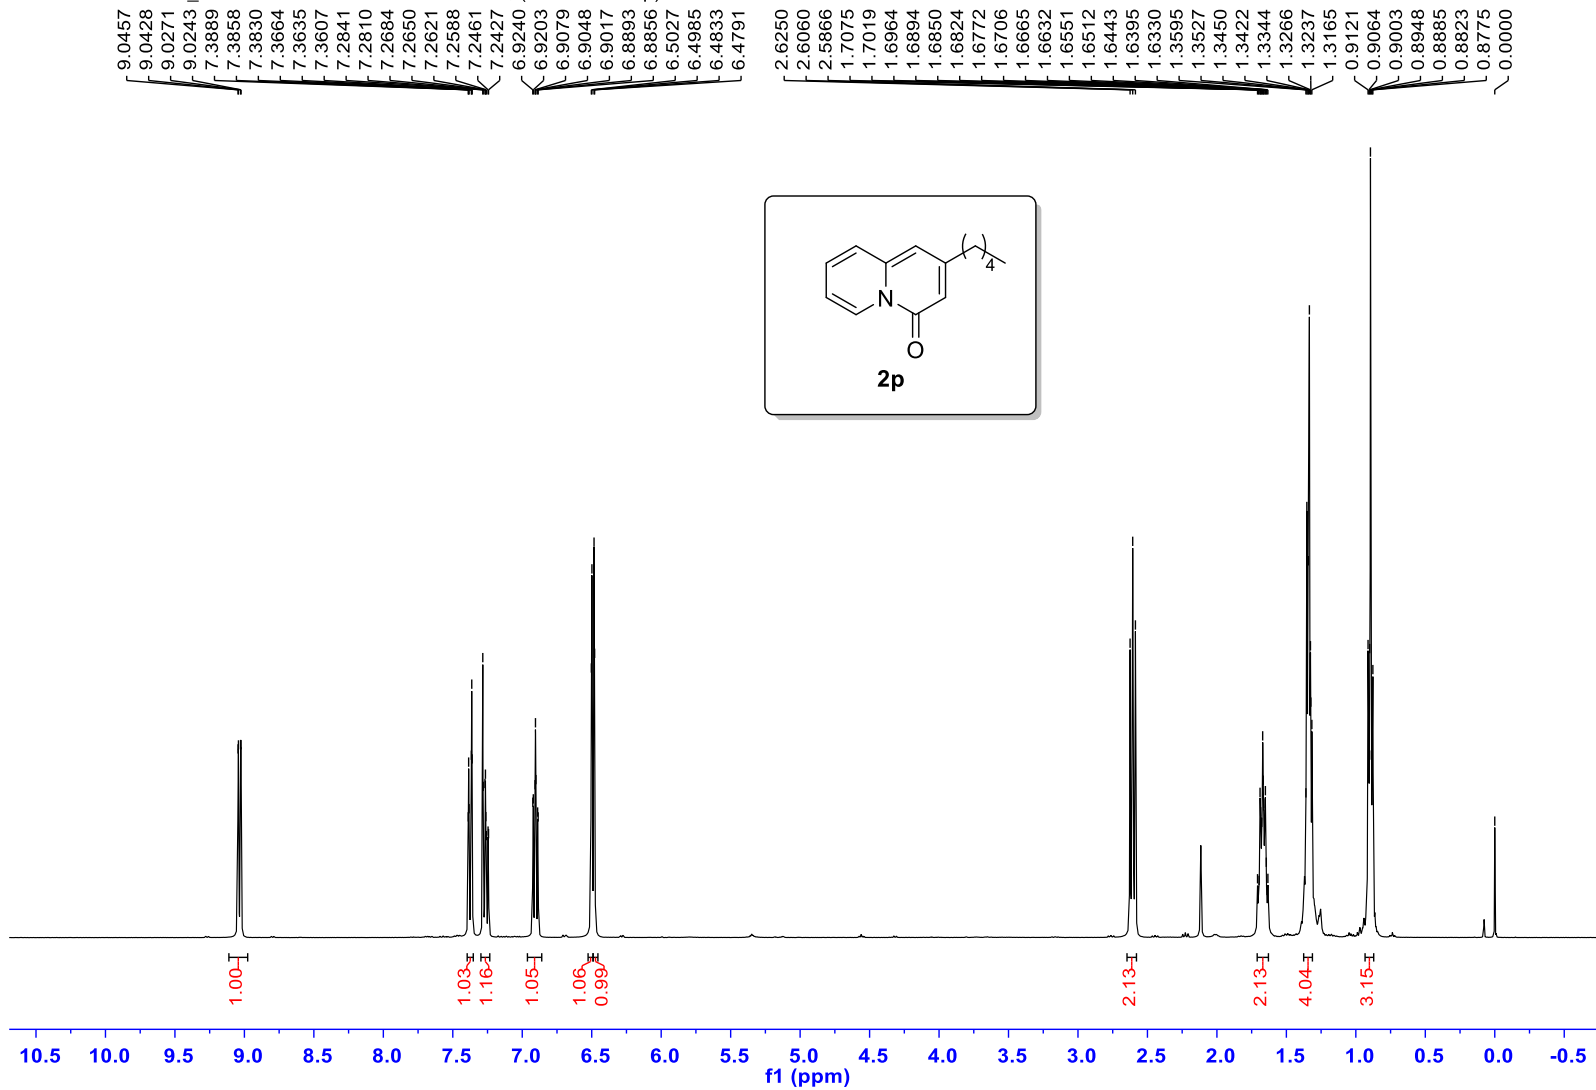



Nov19-2019-OSSO\_cJ.27.fid — XPC-X181217-3-CNMR (2-正戊基2p)

— 158.69  
— 154.61

— 141.87

— 129.16  
— 127.15  
— 125.08

— 114.27  
— 108.80  
— 104.15

— 77.47  
— 77.15  
— 76.84

— 36.01  
— 31.46  
— 29.84

— 22.57

— 14.07

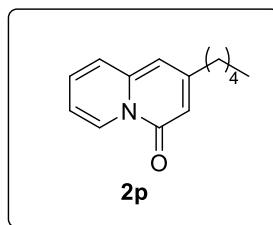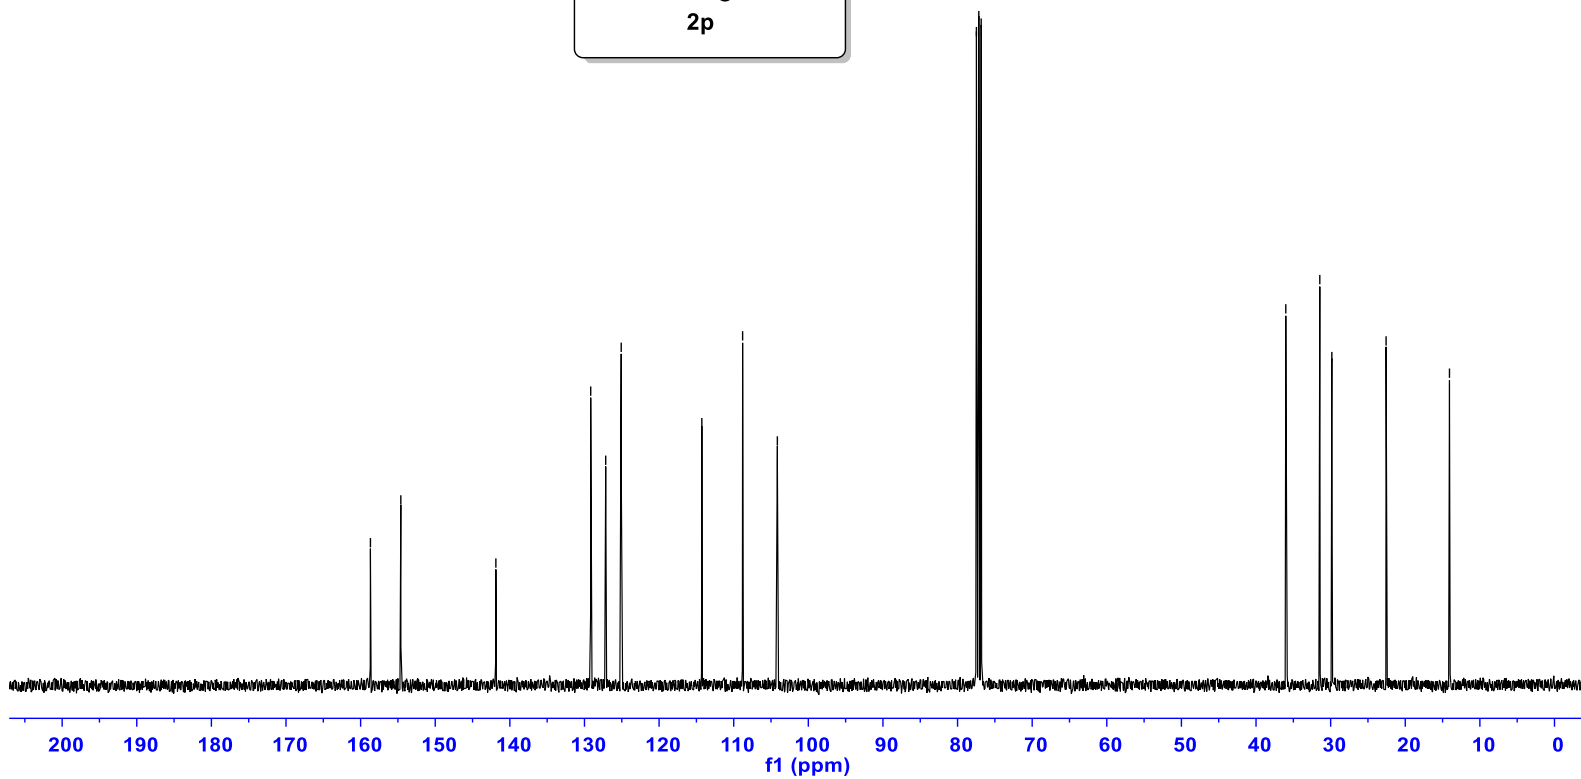

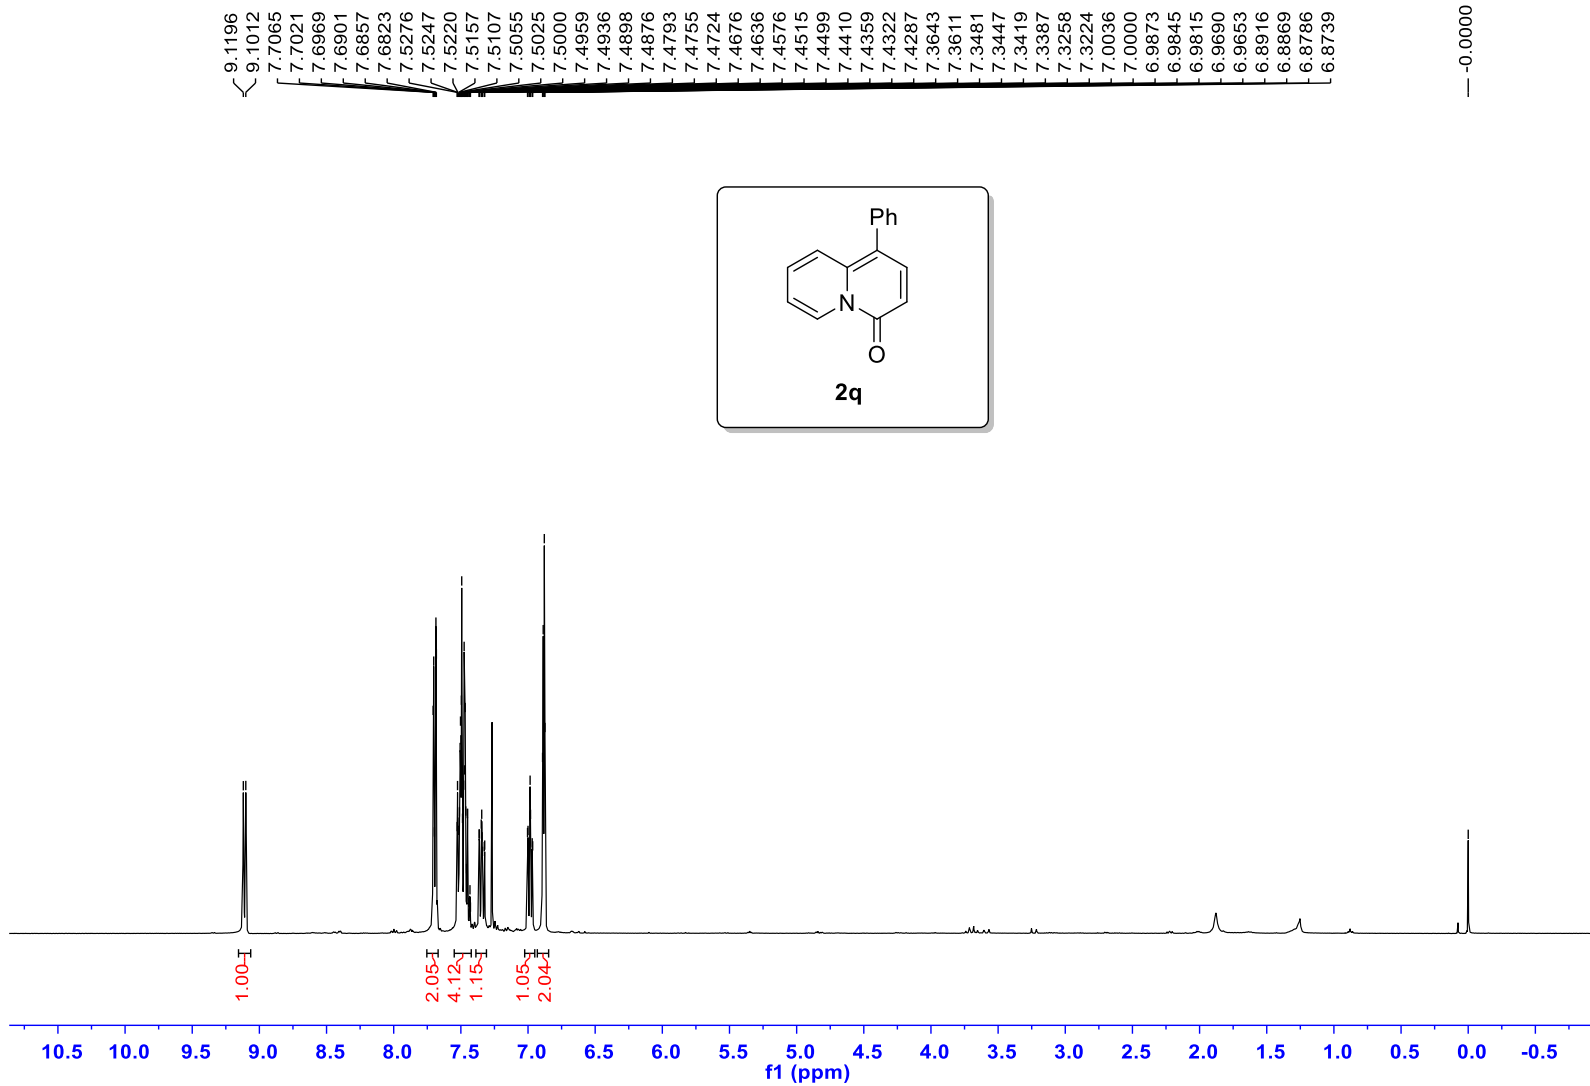

Dec04-2020-OSSO\_cJ.13.fid — XPC-X201202-2

— 158.74  
— 150.45  
— 142.32  
— 138.45  
— 129.66  
— 129.27  
— 129.03  
— 127.26  
— 127.24  
— 125.67  
— 114.81  
— 106.63  
— 102.10

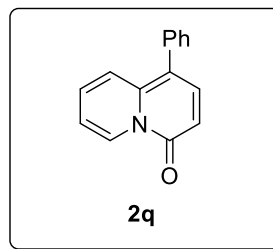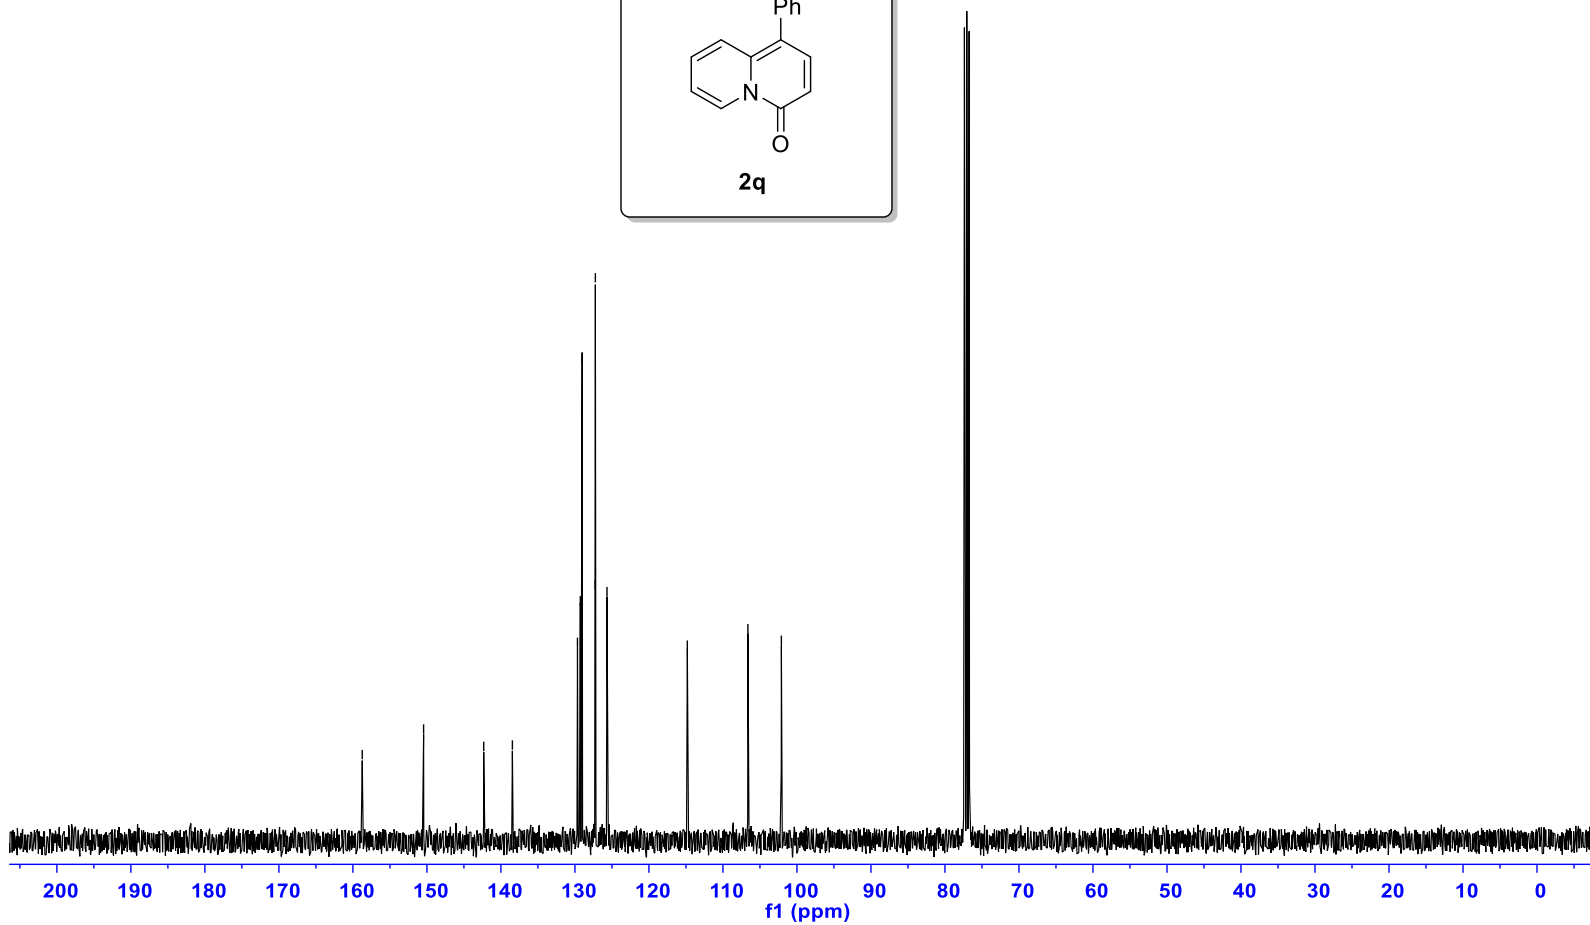

Nov09-2016-osso-cj.12.fid — XPC-X16Y09-1-HNMR

9.0144  
8.9958  
7.5239  
7.5214  
7.5047  
7.5023  
7.3364  
7.3142  
7.1450  
7.1418  
7.1286  
7.1249  
7.1202  
7.1066  
7.1035  
6.8759  
6.8723  
6.8598  
6.8568  
6.8537  
6.8411  
6.8374  
6.5371  
6.5181

2.2884

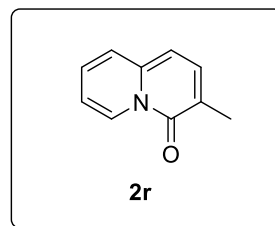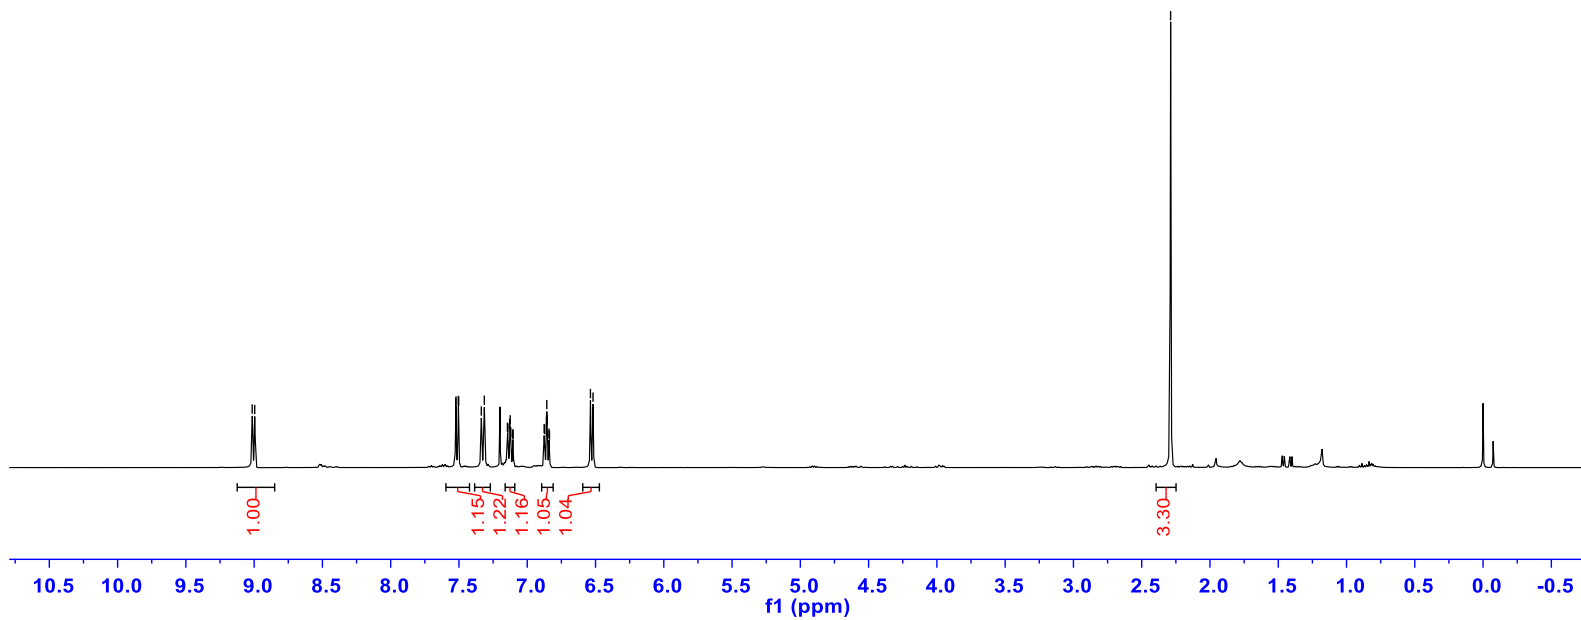

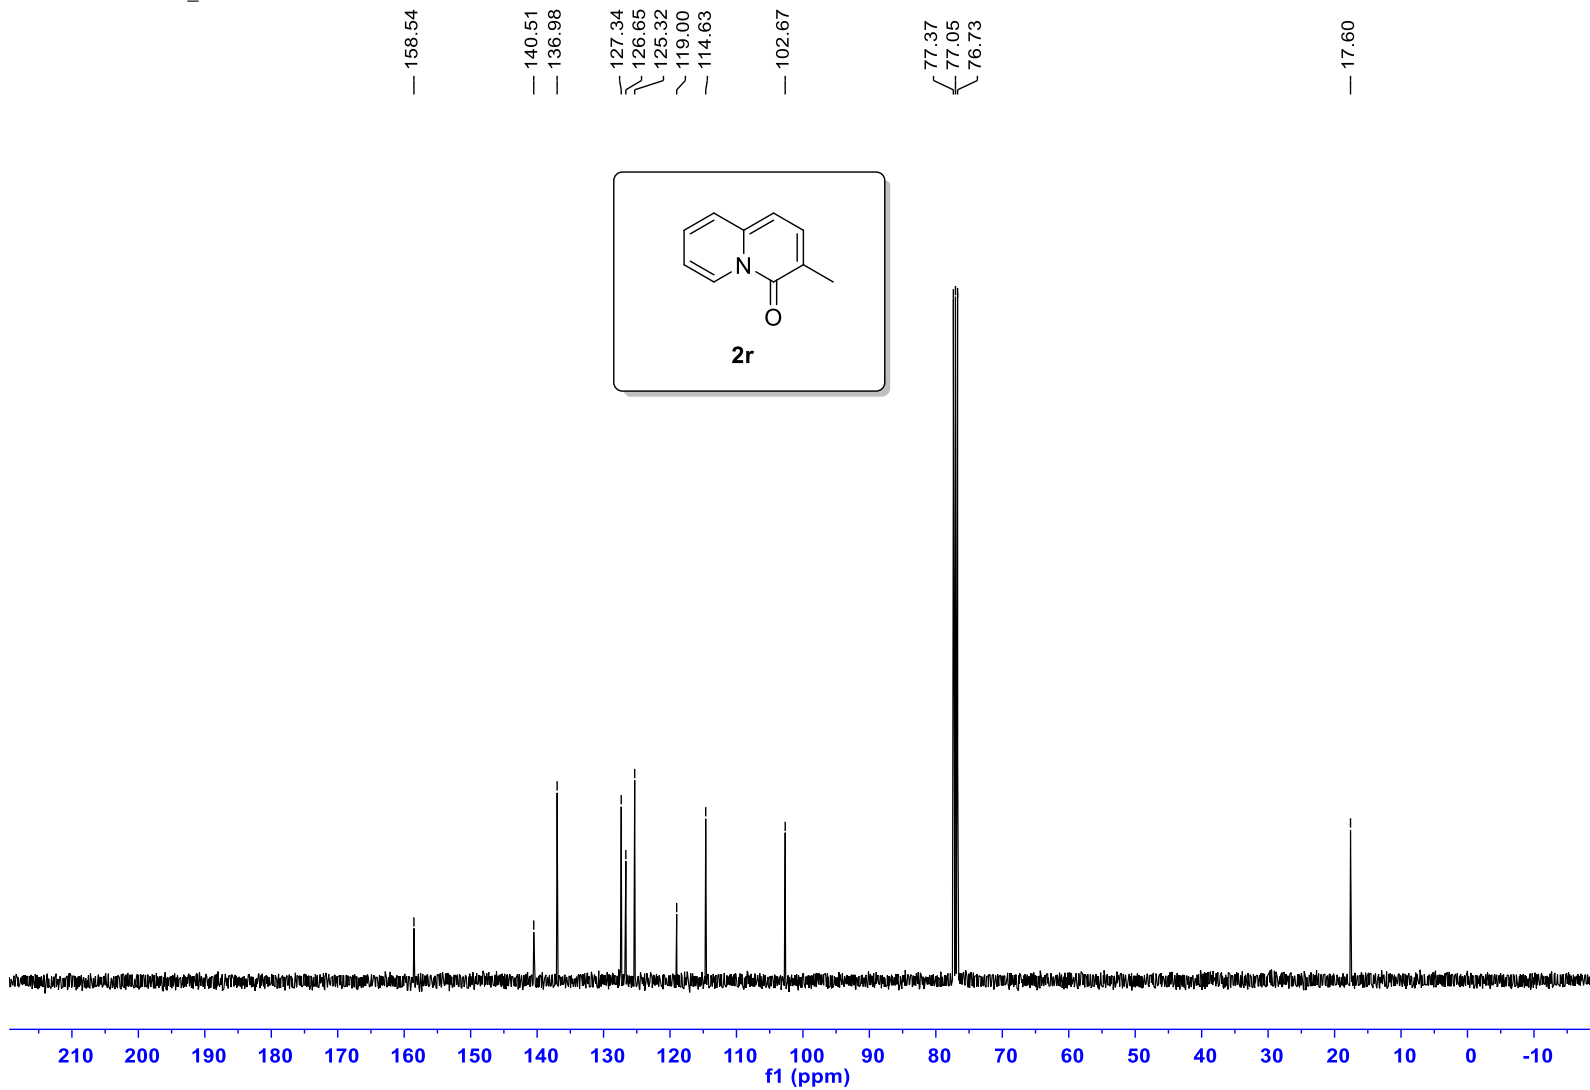

Supplement: d0ob02529a1.pdf [file d0ob02529a1.pdf]
